# Supplementary material for: ToPS: A Framework to Manipulate Probabilistic Models of Sequence Data
Source: PLoS Comput Biol. 2013 Oct 3;9(10):e1003234. doi: 10.1371/journal.pcbi.1003234 (PMC3789777; doi:10.1371/journal.pcbi.1003234)
Supplement: Software S1 — Source code for ToPS. A compressed file containing the source code for ToPS. (GZ) [file pcbi.1003234.s001.gz]

Archive with 979 entries (860 files):
- tops
- tops/.git
- tops/.gitignore
- tops/.gitmodules
- tops/app
- tops/cmake_install.cmake
- tops/CMakeCache.txt
- tops/CMakeLists.txt
- tops/CTestTestfile.cmake
- tops/doc
- tops/examples
- tops/FindPerlLibs.cmake
- tops/FindRmath.cmake
- tops/googletest
- tops/lang
- tops/LICENSE.txt
- tops/Makefile
- tops/README
- tops/src
- tops/tops-R-package
- tops/update_version.pl
- tops/tops-R-package/DESCRIPTION
- tops/tops-R-package/Makevars
- tops/tops-R-package/man
- tops/tops-R-package/R
- tops/tops-R-package/src
- tops/tops-R-package/src/evaluate.cpp
- tops/tops-R-package/src/load_model.cpp
- tops/tops-R-package/src/Makevars
- tops/tops-R-package/src/ProbabilisticModelParameterAdapter.cpp
- tops/tops-R-package/src/ProbabilisticModelParameterAdapter.hpp
- tops/tops-R-package/src/save_model.cpp
- tops/tops-R-package/src/simulate.cpp
- tops/tops-R-package/src/tops.cpp
- tops/tops-R-package/src/tops.h
- tops/tops-R-package/src/tops_to_R.cpp
- tops/tops-R-package/src/tops_to_R.hpp
- tops/tops-R-package/src/ToPSWrapperClient.cpp
- tops/tops-R-package/src/ToPSWrapperClient.hpp
- tops/tops-R-package/src/train.cpp
- tops/tops-R-package/src/viterbi.cpp
- tops/tops-R-package/R/evaluate.R
- tops/tops-R-package/R/load_model.R
- tops/tops-R-package/R/save_model.R
- tops/tops-R-package/R/simulate.R
- tops/tops-R-package/R/train_model.R
- tops/tops-R-package/R/viterbi.R
- tops/tops-R-package/R/zzz.R
- tops/tops-R-package/man/tops.Rd
- tops/tops-R-package/man/tops_evaluate.Rd
- tops/tops-R-package/man/tops_load.Rd
- tops/tops-R-package/man/tops_save.Rd
- tops/tops-R-package/man/tops_simulate.Rd
- tops/tops-R-package/man/tops_train.Rd
- tops/tops-R-package/man/tops_viterbi.Rd
- tops/src/AkaikeInformationCriteria.cpp
- tops/src/AkaikeInformationCriteria.hpp
- tops/src/Alphabet.cpp
- tops/src/Alphabet.hpp
- tops/src/BayesianInformationCriteria.cpp
- tops/src/BayesianInformationCriteria.hpp
- tops/src/BernoulliModelCreator.cpp
- tops/src/BernoulliModelCreator.hpp
- tops/src/cmake_install.cmake
- tops/src/CMakeFiles
- tops/src/CMakeLists.txt
- tops/src/ConfigurationReader.cpp
- tops/src/ConfigurationReader.hpp
- tops/src/ContextTree.cpp
- tops/src/ContextTree.hpp
- tops/src/crossplatform.hpp
- tops/src/DecodableModel.cpp
- tops/src/DecodableModel.hpp
- tops/src/DegenerateDistribution.hpp
- tops/src/DiscreteIIDModel.cpp
- tops/src/DiscreteIIDModel.hpp
- tops/src/DiscreteIIDModelCreateModel.cpp
- tops/src/DiscreteIIDModelCreator.cpp
- tops/src/DiscreteIIDModelCreator.hpp
- tops/src/doxygen.cnf
- tops/src/FactorableModel.cpp
- tops/src/FactorableModel.hpp
- tops/src/FactorableModelPrefixSumArray.cpp
- tops/src/FactorableModelPrefixSumArray.hpp
- tops/src/FixedSequenceAtPosition.cpp
- tops/src/FixedSequenceAtPosition.hpp
- tops/src/FixedSequenceAtPositionCreator.cpp
- tops/src/FixedSequenceAtPositionCreator.hpp
- tops/src/GeneralizedHiddenMarkovModel.cpp
- tops/src/GeneralizedHiddenMarkovModel.hpp
- tops/src/GeneralizedHiddenMarkovModelCreator.cpp
- tops/src/GeneralizedHiddenMarkovModelCreator.hpp
- tops/src/GeneralizedPairHiddenMarkovModel.cpp
- tops/src/GeneralizedPairHiddenMarkovModel.hpp
- tops/src/GeneralizedPairHiddenMarkovModelCreator.cpp
- tops/src/GeneralizedPairHiddenMarkovModelCreator.hpp
- tops/src/GHMMStates.cpp
- tops/src/GHMMStates.hpp
- tops/src/HiddenMarkovModel.cpp
- tops/src/HiddenMarkovModel.hpp
- tops/src/HiddenMarkovModelCreator.cpp
- tops/src/HiddenMarkovModelCreator.hpp
- tops/src/InhomogeneousFactorableModel.cpp
- tops/src/InhomogeneousFactorableModel.hpp
- tops/src/InhomogeneousMarkovChain.cpp
- tops/src/InhomogeneousMarkovChain.hpp
- tops/src/InhomogeneousMarkovChainCreator.cpp
- tops/src/InhomogeneousMarkovChainCreator.hpp
- tops/src/Makefile
- tops/src/MaximumDependenceDecomposition.cpp
- tops/src/MaximumDependenceDecomposition.hpp
- tops/src/MultipleAlignment.cpp
- tops/src/MultipleAlignment.hpp
- tops/src/MultipleSequentialModel.cpp
- tops/src/MultipleSequentialModel.hpp
- tops/src/MultipleSequentialModelCreator.cpp
- tops/src/MultipleSequentialModelCreator.hpp
- tops/src/NullPrefixSumArray.hpp
- tops/src/PairDecodableModel.hpp
- tops/src/PairHiddenMarkovModel.cpp
- tops/src/PairHiddenMarkovModel.hpp
- tops/src/PairHiddenMarkovModelCreator.cpp
- tops/src/PairHiddenMarkovModelCreator.hpp
- tops/src/PhasedFactorableModelEvaluationAlgorithm.cpp
- tops/src/PhasedFactorableModelEvaluationAlgorithm.hpp
- tops/src/PhasedRunLengthDistribution.cpp
- tops/src/PhasedRunLengthDistribution.hpp
- tops/src/PhasedRunLengthDistributionCreator.cpp
- tops/src/PhasedRunLengthDistributionCreator.hpp
- tops/src/PrefixSumArray.hpp
- tops/src/ProbabilisticModel.hpp
- tops/src/ProbabilisticModelConfiguration.cpp
- tops/src/ProbabilisticModelConfiguration.hpp
- tops/src/ProbabilisticModelCreator.hpp
- tops/src/ProbabilisticModelCreatorClient.cpp
- tops/src/ProbabilisticModelCreatorClient.hpp
- tops/src/ProbabilisticModelDecorator.hpp
- tops/src/ProbabilisticModelParameter.cpp
- tops/src/ProbabilisticModelParameter.hpp
- tops/src/ProbabilisticModelParameterValue2.cpp
- tops/src/ProbabilisticModelParameterValue2.hpp
- tops/src/ProfileHiddenMarkovModel.cpp
- tops/src/ProfileHiddenMarkovModel.hpp
- tops/src/ProfileHiddenMarkovModelCreator.cpp
- tops/src/ProfileHiddenMarkovModelCreator.hpp
- tops/src/RemoveSequenceFromModel.cpp
- tops/src/RemoveSequenceFromModel.hpp
- tops/src/ReverseComplementDNA.cpp
- tops/src/ReverseComplementDNA.hpp
- tops/src/ReverseComplementDNACreator.cpp
- tops/src/ReverseComplementDNACreator.hpp
- tops/src/Sequence.hpp
- tops/src/SequenceEntry.cpp
- tops/src/SequenceEntry.hpp
- tops/src/SequenceFactory.cpp
- tops/src/SequenceFactory.hpp
- tops/src/SequenceFormat.cpp
- tops/src/SequenceFormat.hpp
- tops/src/SimilarityBasedSequenceWeighting.cpp
- tops/src/SimilarityBasedSequenceWeighting.hpp
- tops/src/SimilarityBasedSequenceWeightingCreator.cpp
- tops/src/SimilarityBasedSequenceWeightingCreator.hpp
- tops/src/SmoothedHistogramBurge.cpp
- tops/src/SmoothedHistogramBurge.hpp
- tops/src/SmoothedHistogramKernelDensity.cpp
- tops/src/SmoothedHistogramKernelDensity.hpp
- tops/src/SmoothedHistogramStanke.cpp
- tops/src/SmoothedHistogramStanke.hpp
- tops/src/SparseMatrix.cpp
- tops/src/SparseMatrix.hpp
- tops/src/StoreLoadedModel.cpp
- tops/src/StoreLoadedModel.hpp
- tops/src/Symbol.cpp
- tops/src/Symbol.hpp
- tops/src/TargetModel.cpp
- tops/src/TargetModel.hpp
- tops/src/TargetModelCreator.cpp
- tops/src/TargetModelCreator.hpp
- tops/src/TrainDiscreteIIDModel.cpp
- tops/src/TrainDiscreteIIDModel.hpp
- tops/src/TrainFixedLengthMarkovChain.cpp
- tops/src/TrainFixedLengthMarkovChain.hpp
- tops/src/TrainGHMMTransitions.cpp
- tops/src/TrainGHMMTransitions.hpp
- tops/src/TrainHMMBaumWelch.cpp
- tops/src/TrainHMMBaumWelch.hpp
- tops/src/TrainHMMMaximumLikelihood.cpp
- tops/src/TrainHMMMaximumLikelihood.hpp
- tops/src/TrainInterpolatedMarkovChain.cpp
- tops/src/TrainInterpolatedMarkovChain.hpp
- tops/src/TrainInterpolatedPhasedMarkovChain.cpp
- tops/src/TrainInterpolatedPhasedMarkovChain.hpp
- tops/src/TrainPhasedMarkovChain.cpp
- tops/src/TrainPhasedMarkovChain.hpp
- tops/src/TrainPhasedMarkovChainContextAlgorithm.cpp
- tops/src/TrainPhasedMarkovChainContextAlgorithm.hpp
- tops/src/TrainPHMMBaumWelch.cpp
- tops/src/TrainPHMMBaumWelch.hpp
- tops/src/TrainProfileHMMBaumWelch.cpp
- tops/src/TrainProfileHMMBaumWelch.hpp
- tops/src/TrainProfileHMMMaxLikelihood.cpp
- tops/src/TrainProfileHMMMaxLikelihood.hpp
- tops/src/TrainSimilarityBasedSequenceWeighting.cpp
- tops/src/TrainSimilarityBasedSequenceWeighting.hpp
- tops/src/TrainVariableLengthInhomogeneousMarkovChain.cpp
- tops/src/TrainVariableLengthInhomogeneousMarkovChain.hpp
- tops/src/TrainVariableLengthMarkovChain.cpp
- tops/src/TrainVariableLengthMarkovChain.hpp
- tops/src/TrainWeightArrayModel.cpp
- tops/src/TrainWeightArrayModel.hpp
- tops/src/util.cpp
- tops/src/util.hpp
- tops/src/VariableLengthMarkovChain.cpp
- tops/src/VariableLengthMarkovChain.hpp
- tops/src/VariableLengthMarkovChainCreator.cpp
- tops/src/VariableLengthMarkovChainCreator.hpp
- tops/src/version.hpp
- tops/src/CMakeFiles/CMakeDirectoryInformation.cmake
- tops/src/CMakeFiles/progress.marks
- tops/src/CMakeFiles/ToPS.dir
- tops/src/CMakeFiles/ToPS.dir/__
- tops/src/CMakeFiles/ToPS.dir/build.make
- tops/src/CMakeFiles/ToPS.dir/cmake_clean.cmake
- tops/src/CMakeFiles/ToPS.dir/CXX.includecache
- tops/src/CMakeFiles/ToPS.dir/depend.internal
- tops/src/CMakeFiles/ToPS.dir/depend.make
- tops/src/CMakeFiles/ToPS.dir/DependInfo.cmake
- tops/src/CMakeFiles/ToPS.dir/flags.make
- tops/src/CMakeFiles/ToPS.dir/link.txt
- tops/src/CMakeFiles/ToPS.dir/progress.make
- tops/src/CMakeFiles/ToPS.dir/__/lang
- tops/src/CMakeFiles/ToPS.dir/__/lang/src
- tops/lang/.DS_Store
- tops/lang/app
- tops/lang/cmake_install.cmake
- tops/lang/CMakeFiles
- tops/lang/CMakeLists.txt
- tops/lang/CTestTestfile.cmake
- tops/lang/Makefile
- tops/lang/README.md
- tops/lang/src
- tops/lang/test
- tops/lang/test/.DS_Store
- tops/lang/test/ast_test.cpp
- tops/lang/test/cmake_install.cmake
- tops/lang/test/CMakeFiles
- tops/lang/test/CMakeLists.txt
- tops/lang/test/CTestTestfile.cmake
- tops/lang/test/Makefile
- tops/lang/test/parser_test.cpp
- tops/lang/test/CMakeFiles/ast_test.dir
- tops/lang/test/CMakeFiles/CMakeDirectoryInformation.cmake
- tops/lang/test/CMakeFiles/parser_test.dir
- tops/lang/test/CMakeFiles/progress.marks
- tops/lang/test/CMakeFiles/parser_test.dir/build.make
- tops/lang/test/CMakeFiles/parser_test.dir/cmake_clean.cmake
- tops/lang/test/CMakeFiles/parser_test.dir/CXX.includecache
- tops/lang/test/CMakeFiles/parser_test.dir/depend.internal
- tops/lang/test/CMakeFiles/parser_test.dir/depend.make
- tops/lang/test/CMakeFiles/parser_test.dir/DependInfo.cmake
- tops/lang/test/CMakeFiles/parser_test.dir/flags.make
- tops/lang/test/CMakeFiles/parser_test.dir/link.txt
- tops/lang/test/CMakeFiles/parser_test.dir/progress.make
- tops/lang/test/CMakeFiles/ast_test.dir/build.make
- tops/lang/test/CMakeFiles/ast_test.dir/cmake_clean.cmake
- tops/lang/test/CMakeFiles/ast_test.dir/CXX.includecache
- tops/lang/test/CMakeFiles/ast_test.dir/depend.internal
- tops/lang/test/CMakeFiles/ast_test.dir/depend.make
- tops/lang/test/CMakeFiles/ast_test.dir/DependInfo.cmake
- tops/lang/test/CMakeFiles/ast_test.dir/flags.make
- tops/lang/test/CMakeFiles/ast_test.dir/link.txt
- tops/lang/test/CMakeFiles/ast_test.dir/progress.make
- tops/lang/src/.DS_Store
- tops/lang/src/ASTNode.cpp
- tops/lang/src/ASTNode.hpp
- tops/lang/src/CMakeLists.txt
- tops/lang/src/ConditionalProbabilityMapNode.cpp
- tops/lang/src/ConditionalProbabilityMapNode.hpp
- tops/lang/src/ConditionalProbabilityNode.cpp
- tops/lang/src/ConditionalProbabilityNode.hpp
- tops/lang/src/ConditionNode.cpp
- tops/lang/src/ConditionNode.hpp
- tops/lang/src/ConfigurationNode.cpp
- tops/lang/src/ConfigurationNode.hpp
- tops/lang/src/FloatNode.cpp
- tops/lang/src/FloatNode.hpp
- tops/lang/src/generate-parser
- tops/lang/src/IntegerNode.cpp
- tops/lang/src/IntegerNode.hpp
- tops/lang/src/KeyNode.cpp
- tops/lang/src/KeyNode.hpp
- tops/lang/src/lang.cpp
- tops/lang/src/lang.hpp
- tops/lang/src/ListNode.cpp
- tops/lang/src/ListNode.hpp
- tops/lang/src/parser.cpp
- tops/lang/src/parser.hpp
- tops/lang/src/parser.y
- tops/lang/src/ProbabilityMapNode.cpp
- tops/lang/src/ProbabilityMapNode.hpp
[truncated: 679 more entries]
