# Supplementary material for: ToPS: A Framework to Manipulate Probabilistic Models of Sequence Data
Source: PLoS Comput Biol. 2013 Oct 3;9(10):e1003234. doi: 10.1371/journal.pcbi.1003234 (PMC3789777; doi:10.1371/journal.pcbi.1003234)
Supplement: Software S1 — Source code for ToPS. A compressed file containing the source code for ToPS. (GZ) [file pcbi.1003234.s001.gz › tops/CMakeCache.txt]

# This is the CMakeCache file.
# For build in directory: /Users/yoshiaki/tmp/tops
# It was generated by CMake: /Applications/CMake 2.8-10.app/Contents/bin/cmake
# You can edit this file to change values found and used by cmake.
# If you do not want to change any of the values, simply exit the editor.
# If you do want to change a value, simply edit, save, and exit the editor.
# The syntax for the file is as follows:
# KEY:TYPE=VALUE
# KEY is the name of a variable in the cache.
# TYPE is a hint to GUI's for the type of VALUE, DO NOT EDIT TYPE!.
# VALUE is the current value for the KEY.

########################
# EXTERNAL cache entries
########################

//Build shared libraries (DLLs).
BUILD_SHARED_LIBS:BOOL=OFF

//The directory containing a CMake configuration file for Boost.
Boost_DIR:PATH=Boost_DIR-NOTFOUND

//The Boost FILESYSTEM library
Boost_FILESYSTEM_LIBRARY:FILEPATH=/usr/local/lib/libboost_filesystem.dylib

//Boost filesystem library (debug)
Boost_FILESYSTEM_LIBRARY_DEBUG:FILEPATH=/usr/local/lib/libboost_filesystem.dylib

//Boost filesystem library (release)
Boost_FILESYSTEM_LIBRARY_RELEASE:FILEPATH=/usr/local/lib/libboost_filesystem.dylib

//Path to a file.
Boost_INCLUDE_DIR:PATH=/usr/local/include

//Boost library directory
Boost_LIBRARY_DIRS:FILEPATH=/usr/local/lib

//The Boost PROGRAM_OPTIONS library
Boost_PROGRAM_OPTIONS_LIBRARY:FILEPATH=/usr/local/lib/libboost_program_options.dylib

//Boost program_options library (debug)
Boost_PROGRAM_OPTIONS_LIBRARY_DEBUG:FILEPATH=/usr/local/lib/libboost_program_options.dylib

//Boost program_options library (release)
Boost_PROGRAM_OPTIONS_LIBRARY_RELEASE:FILEPATH=/usr/local/lib/libboost_program_options.dylib

//The Boost REGEX library
Boost_REGEX_LIBRARY:FILEPATH=/usr/local/lib/libboost_regex.dylib

//Boost regex library (debug)
Boost_REGEX_LIBRARY_DEBUG:FILEPATH=/usr/local/lib/libboost_regex.dylib

//Boost regex library (release)
Boost_REGEX_LIBRARY_RELEASE:FILEPATH=/usr/local/lib/libboost_regex.dylib

//The Boost SYSTEM library
Boost_SYSTEM_LIBRARY:FILEPATH=/usr/local/lib/libboost_system.dylib

//Boost system library (debug)
Boost_SYSTEM_LIBRARY_DEBUG:FILEPATH=/usr/local/lib/libboost_system.dylib

//Boost system library (release)
Boost_SYSTEM_LIBRARY_RELEASE:FILEPATH=/usr/local/lib/libboost_system.dylib

//Path to a program.
CMAKE_AR:FILEPATH=/usr/bin/ar

//Choose the type of build, options are: None(CMAKE_CXX_FLAGS or
// CMAKE_C_FLAGS used) Debug Release RelWithDebInfo MinSizeRel.
CMAKE_BUILD_TYPE:STRING=

//Enable/Disable color output during build.
CMAKE_COLOR_MAKEFILE:BOOL=ON

//CXX compiler.
CMAKE_CXX_COMPILER:FILEPATH=/usr/bin/c++

//Flags used by the compiler during all build types.
CMAKE_CXX_FLAGS:STRING=

//Flags used by the compiler during debug builds.
CMAKE_CXX_FLAGS_DEBUG:STRING=-g

//Flags used by the compiler during release minsize builds.
CMAKE_CXX_FLAGS_MINSIZEREL:STRING=-Os -DNDEBUG

//Flags used by the compiler during release builds (/MD /Ob1 /Oi
// /Ot /Oy /Gs will produce slightly less optimized but smaller
// files).
CMAKE_CXX_FLAGS_RELEASE:STRING=-O3 -DNDEBUG

//Flags used by the compiler during Release with Debug Info builds.
CMAKE_CXX_FLAGS_RELWITHDEBINFO:STRING=-O2 -g -DNDEBUG

//C compiler.
CMAKE_C_COMPILER:FILEPATH=/usr/bin/cc

//Flags used by the compiler during all build types.
CMAKE_C_FLAGS:STRING=

//Flags used by the compiler during debug builds.
CMAKE_C_FLAGS_DEBUG:STRING=-g

//Flags used by the compiler during release minsize builds.
CMAKE_C_FLAGS_MINSIZEREL:STRING=-Os -DNDEBUG

//Flags used by the compiler during release builds (/MD /Ob1 /Oi
// /Ot /Oy /Gs will produce slightly less optimized but smaller
// files).
CMAKE_C_FLAGS_RELEASE:STRING=-O3 -DNDEBUG

//Flags used by the compiler during Release with Debug Info builds.
CMAKE_C_FLAGS_RELWITHDEBINFO:STRING=-O2 -g -DNDEBUG

//Flags used by the linker.
CMAKE_EXE_LINKER_FLAGS:STRING=' '

//Flags used by the linker during debug builds.
CMAKE_EXE_LINKER_FLAGS_DEBUG:STRING=

//Flags used by the linker during release minsize builds.
CMAKE_EXE_LINKER_FLAGS_MINSIZEREL:STRING=

//Flags used by the linker during release builds.
CMAKE_EXE_LINKER_FLAGS_RELEASE:STRING=

//Flags used by the linker during Release with Debug Info builds.
CMAKE_EXE_LINKER_FLAGS_RELWITHDEBINFO:STRING=

//Enable/Disable output of compile commands during generation.
CMAKE_EXPORT_COMPILE_COMMANDS:BOOL=OFF

//Path to a program.
CMAKE_INSTALL_NAME_TOOL:FILEPATH=/usr/bin/install_name_tool

//Install path prefix, prepended onto install directories.
CMAKE_INSTALL_PREFIX:PATH=/usr/local

//Path to a program.
CMAKE_LINKER:FILEPATH=/usr/bin/ld

//Path to a program.
CMAKE_MAKE_PROGRAM:FILEPATH=/usr/bin/make

//Flags used by the linker during the creation of modules.
CMAKE_MODULE_LINKER_FLAGS:STRING=' '

//Flags used by the linker during debug builds.
CMAKE_MODULE_LINKER_FLAGS_DEBUG:STRING=

//Flags used by the linker during release minsize builds.
CMAKE_MODULE_LINKER_FLAGS_MINSIZEREL:STRING=

//Flags used by the linker during release builds.
CMAKE_MODULE_LINKER_FLAGS_RELEASE:STRING=

//Flags used by the linker during Release with Debug Info builds.
CMAKE_MODULE_LINKER_FLAGS_RELWITHDEBINFO:STRING=

//Path to a program.
CMAKE_NM:FILEPATH=/usr/bin/nm

//Path to a program.
CMAKE_OBJCOPY:FILEPATH=CMAKE_OBJCOPY-NOTFOUND

//Path to a program.
CMAKE_OBJDUMP:FILEPATH=CMAKE_OBJDUMP-NOTFOUND

//Build architectures for OSX
CMAKE_OSX_ARCHITECTURES:STRING=

//Minimum OS X version to target for deployment (at runtime); newer
// APIs weak linked. Set to empty string for default value.
CMAKE_OSX_DEPLOYMENT_TARGET:STRING=

//The product will be built against the headers and libraries located
// inside the indicated SDK.
CMAKE_OSX_SYSROOT:STRING=

//Value Computed by CMake
CMAKE_PROJECT_NAME:STATIC=ToPS

//Path to a program.
CMAKE_RANLIB:FILEPATH=/usr/bin/ranlib

//Flags used by the linker during the creation of dll's.
CMAKE_SHARED_LINKER_FLAGS:STRING=' '

//Flags used by the linker during debug builds.
CMAKE_SHARED_LINKER_FLAGS_DEBUG:STRING=

//Flags used by the linker during release minsize builds.
CMAKE_SHARED_LINKER_FLAGS_MINSIZEREL:STRING=

//Flags used by the linker during release builds.
CMAKE_SHARED_LINKER_FLAGS_RELEASE:STRING=

//Flags used by the linker during Release with Debug Info builds.
CMAKE_SHARED_LINKER_FLAGS_RELWITHDEBINFO:STRING=

//If set, runtime paths are not added when installing shared libraries,
// but are added when building.
CMAKE_SKIP_INSTALL_RPATH:BOOL=NO

//If set, runtime paths are not added when using shared libraries.
CMAKE_SKIP_RPATH:BOOL=NO

//Path to a program.
CMAKE_STRIP:FILEPATH=/usr/bin/strip

//If true, cmake will use relative paths in makefiles and projects.
CMAKE_USE_RELATIVE_PATHS:BOOL=OFF

//If this value is on, makefiles will be generated without the
// .SILENT directive, and all commands will be echoed to the console
// during the make.  This is useful for debugging only. With Visual
// Studio IDE projects all commands are done without /nologo.
CMAKE_VERBOSE_MAKEFILE:BOOL=FALSE

//Path to a program.
PYTHON_EXECUTABLE:FILEPATH=/Library/Frameworks/Python.framework/Versions/2.7/bin/python

//Value Computed by CMake
ToPS_BINARY_DIR:STATIC=/Users/yoshiaki/tmp/tops

//Dependencies for the target
ToPS_LIB_DEPENDS:STATIC=general;/usr/local/lib/libboost_regex.dylib;general;/usr/local/lib/libboost_system.dylib;general;/usr/local/lib/libboost_filesystem.dylib;

//Value Computed by CMake
ToPS_SOURCE_DIR:STATIC=/Users/yoshiaki/tmp/tops

//Value Computed by CMake
gtest_BINARY_DIR:STATIC=/Users/yoshiaki/tmp/tops/googletest

//Dependencies for target
gtest_LIB_DEPENDS:STATIC=

//Value Computed by CMake
gtest_SOURCE_DIR:STATIC=/Users/yoshiaki/tmp/tops/googletest

//Build gtest's sample programs.
gtest_build_samples:BOOL=OFF

//Build all of gtest's own tests.
gtest_build_tests:BOOL=OFF

//Disable uses of pthreads in gtest.
gtest_disable_pthreads:BOOL=OFF

//Use shared (DLL) run-time lib even when Google Test is built
// as static lib.
gtest_force_shared_crt:BOOL=OFF

//Dependencies for the target
gtest_main_LIB_DEPENDS:STATIC=general;gtest;

//Value Computed by CMake
tops-lang_BINARY_DIR:STATIC=/Users/yoshiaki/tmp/tops/lang

//Value Computed by CMake
tops-lang_SOURCE_DIR:STATIC=/Users/yoshiaki/tmp/tops/lang


########################
# INTERNAL cache entries
########################

//Whether the Boost FILESYSTEM library found
Boost_FILESYSTEM_FOUND:INTERNAL=ON
//ADVANCED property for variable: Boost_FILESYSTEM_LIBRARY
Boost_FILESYSTEM_LIBRARY-ADVANCED:INTERNAL=1
//ADVANCED property for variable: Boost_FILESYSTEM_LIBRARY_DEBUG
Boost_FILESYSTEM_LIBRARY_DEBUG-ADVANCED:INTERNAL=1
//ADVANCED property for variable: Boost_FILESYSTEM_LIBRARY_RELEASE
Boost_FILESYSTEM_LIBRARY_RELEASE-ADVANCED:INTERNAL=1
//ADVANCED property for variable: Boost_INCLUDE_DIR
Boost_INCLUDE_DIR-ADVANCED:INTERNAL=1
//ADVANCED property for variable: Boost_LIBRARY_DIRS
Boost_LIBRARY_DIRS-ADVANCED:INTERNAL=1
//The library version string for boost libraries
Boost_LIB_VERSION:INTERNAL=1_52
//Whether the Boost PROGRAM_OPTIONS library found
Boost_PROGRAM_OPTIONS_FOUND:INTERNAL=ON
//ADVANCED property for variable: Boost_PROGRAM_OPTIONS_LIBRARY
Boost_PROGRAM_OPTIONS_LIBRARY-ADVANCED:INTERNAL=1
//ADVANCED property for variable: Boost_PROGRAM_OPTIONS_LIBRARY_DEBUG
Boost_PROGRAM_OPTIONS_LIBRARY_DEBUG-ADVANCED:INTERNAL=1
//ADVANCED property for variable: Boost_PROGRAM_OPTIONS_LIBRARY_RELEASE
Boost_PROGRAM_OPTIONS_LIBRARY_RELEASE-ADVANCED:INTERNAL=1
//Whether the Boost REGEX library found
Boost_REGEX_FOUND:INTERNAL=ON
//ADVANCED property for variable: Boost_REGEX_LIBRARY
Boost_REGEX_LIBRARY-ADVANCED:INTERNAL=1
//ADVANCED property for variable: Boost_REGEX_LIBRARY_DEBUG
Boost_REGEX_LIBRARY_DEBUG-ADVANCED:INTERNAL=1
//ADVANCED property for variable: Boost_REGEX_LIBRARY_RELEASE
Boost_REGEX_LIBRARY_RELEASE-ADVANCED:INTERNAL=1
//Whether the Boost SYSTEM library found
Boost_SYSTEM_FOUND:INTERNAL=ON
//ADVANCED property for variable: Boost_SYSTEM_LIBRARY
Boost_SYSTEM_LIBRARY-ADVANCED:INTERNAL=1
//ADVANCED property for variable: Boost_SYSTEM_LIBRARY_DEBUG
Boost_SYSTEM_LIBRARY_DEBUG-ADVANCED:INTERNAL=1
//ADVANCED property for variable: Boost_SYSTEM_LIBRARY_RELEASE
Boost_SYSTEM_LIBRARY_RELEASE-ADVANCED:INTERNAL=1
//The version number for boost libraries
Boost_VERSION:INTERNAL=105200
//ADVANCED property for variable: CMAKE_AR
CMAKE_AR-ADVANCED:INTERNAL=1
//ADVANCED property for variable: CMAKE_BUILD_TOOL
CMAKE_BUILD_TOOL-ADVANCED:INTERNAL=1
//What is the target build tool cmake is generating for.
CMAKE_BUILD_TOOL:INTERNAL=/usr/bin/make
//This is the directory where this CMakeCache.txt was created
CMAKE_CACHEFILE_DIR:INTERNAL=/Users/yoshiaki/tmp/tops
//Major version of cmake used to create the current loaded cache
CMAKE_CACHE_MAJOR_VERSION:INTERNAL=2
//Minor version of cmake used to create the current loaded cache
CMAKE_CACHE_MINOR_VERSION:INTERNAL=8
//Patch version of cmake used to create the current loaded cache
CMAKE_CACHE_PATCH_VERSION:INTERNAL=10
//ADVANCED property for variable: CMAKE_COLOR_MAKEFILE
CMAKE_COLOR_MAKEFILE-ADVANCED:INTERNAL=1
//Path to CMake executable.
CMAKE_COMMAND:INTERNAL=/Applications/CMake 2.8-10.app/Contents/bin/cmake
//Path to cpack program executable.
CMAKE_CPACK_COMMAND:INTERNAL=/Applications/CMake 2.8-10.app/Contents/bin/cpack
//Path to ctest program executable.
CMAKE_CTEST_COMMAND:INTERNAL=/Applications/CMake 2.8-10.app/Contents/bin/ctest
//ADVANCED property for variable: CMAKE_CXX_COMPILER
CMAKE_CXX_COMPILER-ADVANCED:INTERNAL=1
//ADVANCED property for variable: CMAKE_CXX_FLAGS
CMAKE_CXX_FLAGS-ADVANCED:INTERNAL=1
//ADVANCED property for variable: CMAKE_CXX_FLAGS_DEBUG
CMAKE_CXX_FLAGS_DEBUG-ADVANCED:INTERNAL=1
//ADVANCED property for variable: CMAKE_CXX_FLAGS_MINSIZEREL
CMAKE_CXX_FLAGS_MINSIZEREL-ADVANCED:INTERNAL=1
//ADVANCED property for variable: CMAKE_CXX_FLAGS_RELEASE
CMAKE_CXX_FLAGS_RELEASE-ADVANCED:INTERNAL=1
//ADVANCED property for variable: CMAKE_CXX_FLAGS_RELWITHDEBINFO
CMAKE_CXX_FLAGS_RELWITHDEBINFO-ADVANCED:INTERNAL=1
//ADVANCED property for variable: CMAKE_C_COMPILER
CMAKE_C_COMPILER-ADVANCED:INTERNAL=1
//ADVANCED property for variable: CMAKE_C_FLAGS
CMAKE_C_FLAGS-ADVANCED:INTERNAL=1
//ADVANCED property for variable: CMAKE_C_FLAGS_DEBUG
CMAKE_C_FLAGS_DEBUG-ADVANCED:INTERNAL=1
//ADVANCED property for variable: CMAKE_C_FLAGS_MINSIZEREL
CMAKE_C_FLAGS_MINSIZEREL-ADVANCED:INTERNAL=1
//ADVANCED property for variable: CMAKE_C_FLAGS_RELEASE
CMAKE_C_FLAGS_RELEASE-ADVANCED:INTERNAL=1
//ADVANCED property for variable: CMAKE_C_FLAGS_RELWITHDEBINFO
CMAKE_C_FLAGS_RELWITHDEBINFO-ADVANCED:INTERNAL=1
//Path to cache edit program executable.
CMAKE_EDIT_COMMAND:INTERNAL=/Applications/CMake 2.8-10.app/Contents/bin/ccmake
//Executable file format
CMAKE_EXECUTABLE_FORMAT:INTERNAL=Unknown
//ADVANCED property for variable: CMAKE_EXE_LINKER_FLAGS
CMAKE_EXE_LINKER_FLAGS-ADVANCED:INTERNAL=1
//ADVANCED property for variable: CMAKE_EXE_LINKER_FLAGS_DEBUG
CMAKE_EXE_LINKER_FLAGS_DEBUG-ADVANCED:INTERNAL=1
//ADVANCED property for variable: CMAKE_EXE_LINKER_FLAGS_MINSIZEREL
CMAKE_EXE_LINKER_FLAGS_MINSIZEREL-ADVANCED:INTERNAL=1
//ADVANCED property for variable: CMAKE_EXE_LINKER_FLAGS_RELEASE
CMAKE_EXE_LINKER_FLAGS_RELEASE-ADVANCED:INTERNAL=1
//ADVANCED property for variable: CMAKE_EXE_LINKER_FLAGS_RELWITHDEBINFO
CMAKE_EXE_LINKER_FLAGS_RELWITHDEBINFO-ADVANCED:INTERNAL=1
//ADVANCED property for variable: CMAKE_EXPORT_COMPILE_COMMANDS
CMAKE_EXPORT_COMPILE_COMMANDS-ADVANCED:INTERNAL=1
//Name of generator.
CMAKE_GENERATOR:INTERNAL=Unix Makefiles
//Have symbol pthread_create
CMAKE_HAVE_LIBC_CREATE:INTERNAL=1
//Have include pthread.h
CMAKE_HAVE_PTHREAD_H:INTERNAL=1
//Start directory with the top level CMakeLists.txt file for this
// project
CMAKE_HOME_DIRECTORY:INTERNAL=/Users/yoshiaki/tmp/tops
//ADVANCED property for variable: CMAKE_INSTALL_NAME_TOOL
CMAKE_INSTALL_NAME_TOOL-ADVANCED:INTERNAL=1
//ADVANCED property for variable: CMAKE_LINKER
CMAKE_LINKER-ADVANCED:INTERNAL=1
//ADVANCED property for variable: CMAKE_MAKE_PROGRAM
CMAKE_MAKE_PROGRAM-ADVANCED:INTERNAL=1
//ADVANCED property for variable: CMAKE_MODULE_LINKER_FLAGS
CMAKE_MODULE_LINKER_FLAGS-ADVANCED:INTERNAL=1
//ADVANCED property for variable: CMAKE_MODULE_LINKER_FLAGS_DEBUG
CMAKE_MODULE_LINKER_FLAGS_DEBUG-ADVANCED:INTERNAL=1
//ADVANCED property for variable: CMAKE_MODULE_LINKER_FLAGS_MINSIZEREL
CMAKE_MODULE_LINKER_FLAGS_MINSIZEREL-ADVANCED:INTERNAL=1
//ADVANCED property for variable: CMAKE_MODULE_LINKER_FLAGS_RELEASE
CMAKE_MODULE_LINKER_FLAGS_RELEASE-ADVANCED:INTERNAL=1
//ADVANCED property for variable: CMAKE_MODULE_LINKER_FLAGS_RELWITHDEBINFO
CMAKE_MODULE_LINKER_FLAGS_RELWITHDEBINFO-ADVANCED:INTERNAL=1
//ADVANCED property for variable: CMAKE_NM
CMAKE_NM-ADVANCED:INTERNAL=1
//number of local generators
CMAKE_NUMBER_OF_LOCAL_GENERATORS:INTERNAL=7
//ADVANCED property for variable: CMAKE_OBJCOPY
CMAKE_OBJCOPY-ADVANCED:INTERNAL=1
//ADVANCED property for variable: CMAKE_OBJDUMP
CMAKE_OBJDUMP-ADVANCED:INTERNAL=1
//ADVANCED property for variable: CMAKE_RANLIB
CMAKE_RANLIB-ADVANCED:INTERNAL=1
//Path to CMake installation.
CMAKE_ROOT:INTERNAL=/Applications/CMake 2.8-10.app/Contents/share/cmake-2.8
//ADVANCED property for variable: CMAKE_SHARED_LINKER_FLAGS
CMAKE_SHARED_LINKER_FLAGS-ADVANCED:INTERNAL=1
//ADVANCED property for variable: CMAKE_SHARED_LINKER_FLAGS_DEBUG
CMAKE_SHARED_LINKER_FLAGS_DEBUG-ADVANCED:INTERNAL=1
//ADVANCED property for variable: CMAKE_SHARED_LINKER_FLAGS_MINSIZEREL
CMAKE_SHARED_LINKER_FLAGS_MINSIZEREL-ADVANCED:INTERNAL=1
//ADVANCED property for variable: CMAKE_SHARED_LINKER_FLAGS_RELEASE
CMAKE_SHARED_LINKER_FLAGS_RELEASE-ADVANCED:INTERNAL=1
//ADVANCED property for variable: CMAKE_SHARED_LINKER_FLAGS_RELWITHDEBINFO
CMAKE_SHARED_LINKER_FLAGS_RELWITHDEBINFO-ADVANCED:INTERNAL=1
//ADVANCED property for variable: CMAKE_SKIP_INSTALL_RPATH
CMAKE_SKIP_INSTALL_RPATH-ADVANCED:INTERNAL=1
//ADVANCED property for variable: CMAKE_SKIP_RPATH
CMAKE_SKIP_RPATH-ADVANCED:INTERNAL=1
//ADVANCED property for variable: CMAKE_STRIP
CMAKE_STRIP-ADVANCED:INTERNAL=1
//uname command
CMAKE_UNAME:INTERNAL=/usr/bin/uname
//ADVANCED property for variable: CMAKE_USE_RELATIVE_PATHS
CMAKE_USE_RELATIVE_PATHS-ADVANCED:INTERNAL=1
//ADVANCED property for variable: CMAKE_VERBOSE_MAKEFILE
CMAKE_VERBOSE_MAKEFILE-ADVANCED:INTERNAL=1
//Details about finding PythonInterp
FIND_PACKAGE_MESSAGE_DETAILS_PythonInterp:INTERNAL=[/Library/Frameworks/Python.framework/Versions/2.7/bin/python][v2.7.3()]
//Details about finding Threads
FIND_PACKAGE_MESSAGE_DETAILS_Threads:INTERNAL=[TRUE][v()]
//ADVANCED property for variable: PYTHON_EXECUTABLE
PYTHON_EXECUTABLE-ADVANCED:INTERNAL=1
