# Supplementary material for: ToPS: A Framework to Manipulate Probabilistic Models of Sequence Data
Source: PLoS Comput Biol. 2013 Oct 3;9(10):e1003234. doi: 10.1371/journal.pcbi.1003234 (PMC3789777; doi:10.1371/journal.pcbi.1003234)
Supplement: Software S1 — Source code for ToPS. A compressed file containing the source code for ToPS. (GZ) [file pcbi.1003234.s001.gz › tops/CMakeLists.txt]

project(ToPS)
cmake_minimum_required(VERSION 2.6)
set(CMAKE_MODULE_PATH ${CMAKE_CURRENT_SOURCE_DIR})

find_package(Boost 1.50 COMPONENTS regex REQUIRED)
find_package(Boost 1.50 COMPONENTS program_options REQUIRED)
find_package(Boost 1.50 COMPONENTS system REQUIRED)
find_package(Boost 1.50 COMPONENTS filesystem REQUIRED)

# find_package(PerlLibs)
# ADD_DEFINITIONS("-O0 -Wall -gdwarf-2")
ADD_DEFINITIONS("-Wall -O3 -finline-functions -funroll-loops -ffast-math  -g -O3")


IF(UNIX)
  SET(BOOST_REGEX_LIBRARY ${Boost_REGEX_LIBRARY})
  SET(BOOST_PROGRAM_OPTIONS_LIBRARY ${Boost_PROGRAM_OPTIONS_LIBRARY})
  FIND_LIBRARY(BOOST_REGEX_LIBRARY boost_regex-mt PATHS ${Boost_LIBRARY_DIRS} )
  FIND_LIBRARY(BOOST_PROGRAM_OPTIONS_LIBRARY boost_program_options-mt PATHS ${Boost_LIBRARY_DIRS} )
ENDIF(UNIX)


add_subdirectory(src)
add_subdirectory(app)
add_subdirectory(lang)
add_subdirectory(googletest)

enable_testing()
