# Supplementary material for: ToPS: A Framework to Manipulate Probabilistic Models of Sequence Data
Source: PLoS Comput Biol. 2013 Oct 3;9(10):e1003234. doi: 10.1371/journal.pcbi.1003234 (PMC3789777; doi:10.1371/journal.pcbi.1003234)
Supplement: Software S1 — Source code for ToPS. A compressed file containing the source code for ToPS. (GZ) [file pcbi.1003234.s001.gz › tops/CTestTestfile.cmake]

# CMake generated Testfile for 
# Source directory: /Users/yoshiaki/tmp/tops
# Build directory: /Users/yoshiaki/tmp/tops
# 
# This file includes the relevent testing commands required for 
# testing this directory and lists subdirectories to be tested as well.
SUBDIRS(src)
SUBDIRS(app)
SUBDIRS(lang)
SUBDIRS(googletest)
