# Supplementary material for: ToPS: A Framework to Manipulate Probabilistic Models of Sequence Data
Source: PLoS Comput Biol. 2013 Oct 3;9(10):e1003234. doi: 10.1371/journal.pcbi.1003234 (PMC3789777; doi:10.1371/journal.pcbi.1003234)
Supplement: Software S1 — Source code for ToPS. A compressed file containing the source code for ToPS. (GZ) [file pcbi.1003234.s001.gz › tops/src/BayesianInformationCriteria.cpp]

/*
 *       BayesianInformationCriteria.cpp
 *
 *       Copyright 2011 Andre Yoshiaki Kashiwabara <akashiwabara@usp.br>
 *                      �gor Bonadio <ibonadio@ime.usp.br>
 *                      Vitor Onuchic <vitoronuchic@gmail.com>
 *                      Alan Mitchell Durham <aland@usp.br>
 *
 *       This program is free software; you can redistribute it and/or modify
 *       it under the terms of the GNU  General Public License as published by
 *       the Free Software Foundation; either version 3 of the License, or
 *       (at your option) any later version.
 *
 *       This program is distributed in the hope that it will be useful,
 *       but WITHOUT ANY WARRANTY; without even the implied warranty of
 *       MERCHANTABILITY or FITNESS FOR A PARTICULAR PURPOSE.  See the
 *       GNU General Public License for more details.
 *
 *       You should have received a copy of the GNU General Public License
 *       along with this program; if not, write to the Free Software
 *       Foundation, Inc., 51 Franklin Street, Fifth Floor, Boston,
 *       MA 02110-1301, USA.
 */

#include "BayesianInformationCriteria.hpp"
#include <map>
#include <vector>

namespace tops
{
  std::string BayesianInformationCriteria::help() const {
    std::stringstream out;
    out << "\nUSAGE: " << std::endl;
    out << "Mandatory parameters: " << std::endl;
    out << "\nbegin" << std::endl;
    out << "\tend" << std::endl;
    out << "\tstep" << std::endl;
    out << "Example: " << std::endl;
    out << "The configuration file below specify the BIC to select the WAM with the best order" << std::endl;
    out << "training_algorithm=\"WeightArrayModel\"" << std::endl;
    out << "training_set=\"dataset/sequences.txt\"" << std::endl;
    out << "alphabet=(\"A\", \"C\", \"G\", \"T\")" << std::endl;
    out << "length=31" << std::endl;
    out << "vicinity_length = 0" << std::endl;
    out << "pseudo_counts=0" << std::endl;
    out << "model_selection_criteria = \"BIC\"" << std::endl;
    out << "begin = (\"order\": 0)" << std::endl;
    out << "end = (\"order\": 3)" << std::endl;
    out << "step = (\"order\": 1)" << std::endl;
    return out.str();
  }

  ProbabilisticModelPtr BayesianInformationCriteria::create( ProbabilisticModelParameters & parameters) const
  {
    ProbabilisticModelParameterValuePtr beginpar = parameters.getMandatoryParameterValue("begin");
    ProbabilisticModelParameterValuePtr endpar = parameters.getMandatoryParameterValue("end");
    ProbabilisticModelParameterValuePtr steppar = parameters.getMandatoryParameterValue("step");
    ProbabilisticModelParameterValuePtr trainpar = parameters.getMandatoryParameterValue("training_algorithm");

    if((beginpar == NULL) ||
       (endpar == NULL) ||
       (steppar == NULL))
      {
        std::cerr << help() << std::endl;
        exit(-1);
      }
    std::map<std::string, double> beginmap = beginpar->getDoubleMap();
    std::map<std::string, double> endmap = endpar->getDoubleMap();
    std::map<std::string, double> stepmap = steppar->getDoubleMap();
    std::vector <std::string> parnames;
    std::map <std::string, double>::const_iterator it;
    for(it = beginmap.begin(); it!=beginmap.end(); it++)
      parnames.push_back(it->first);

    // generates all possible combinations of parameters
    std::vector <std::string>::const_iterator p;
    std::vector <std::vector <double> > combinations;
    combinations.resize(1);
    for(p = parnames.begin(); p != parnames.end(); p++)
      {
        std::vector <std::vector <double> > new_combinations;
        for (double i = beginmap[*p] ; i <= endmap[*p]; i += stepmap[*p])
          {
            for(int j = 0; j < (int) combinations.size() ; j++)
              {
                std::vector <double> comb;
                for(int k = 0; k < (int)combinations[j].size(); k++)
                  comb.push_back(combinations[j][k]);
                comb.push_back(i);
                new_combinations.push_back(comb);
              }
          }
        combinations = new_combinations;
      }
    double bic = -HUGE;
    ProbabilisticModelPtr result;
    for(int i = 0; i < (int) combinations.size(); i++)
      {
        for(int j = 0; j < (int) combinations[i].size(); j++)
          {
            DoubleParameterValuePtr value = DoubleParameterValuePtr(new DoubleParameterValue(combinations[i][j]));

            parameters.set(parnames[j], value);
          }
        double loglikelihood;
        int sample_size;
        ProbabilisticModelPtr m = _creator->create(parameters, loglikelihood, sample_size);
        if(m == NULL)
            {
                std::cerr << "ERROR (BIC): could not estimate the model size using BIC " << std::endl;
                exit(-1);
            }
        double model_bic =  loglikelihood  - 0.5* m->size() * log((double) sample_size);
        if((bic < model_bic) || (result == NULL))
          {
            bic = model_bic;
            result = m;
          }

        int k = 0;
        if( k < (int) combinations[i].size())
          {
            std::cerr << combinations[i][k];
            for(k = 1; k < (int) combinations[i].size(); k++)
              std::cerr << "\t" << combinations[i][k];
          }
        std::cerr << "\t" << model_bic  << std::endl;

      }
    std::cout << "# Model BIC: " << bic  << std::endl;
    return result;
  }
}
