# Supplementary material for: ToPS: A Framework to Manipulate Probabilistic Models of Sequence Data
Source: PLoS Comput Biol. 2013 Oct 3;9(10):e1003234. doi: 10.1371/journal.pcbi.1003234 (PMC3789777; doi:10.1371/journal.pcbi.1003234)
Supplement: Software S1 — Source code for ToPS. A compressed file containing the source code for ToPS. (GZ) [file pcbi.1003234.s001.gz › tops/src/GeneralizedHiddenMarkovModel.hpp]

/*
 *       GeneralizedHiddenMarkovModel.hpp
 *
 *       Copyright 2011 Andre Yoshiaki Kashiwabara <akashiwabara@usp.br>
 *                      �gor Bonadio <ibonadio@ime.usp.br>
 *                      Vitor Onuchic <vitoronuchic@gmail.com>
 *                      Alan Mitchell Durham <aland@usp.br>
 *
 *       This program is free software; you can redistribute it and/or modify
 *       it under the terms of the GNU  General Public License as published by
 *       the Free Software Foundation; either version 3 of the License, or
 *       (at your option) any later version.
 *
 *       This program is distributed in the hope that it will be useful,
 *       but WITHOUT ANY WARRANTY; without even the implied warranty of
 *       MERCHANTABILITY or FITNESS FOR A PARTICULAR PURPOSE.  See the
 *       GNU General Public License for more details.
 *
 *       You should have received a copy of the GNU General Public License
 *       along with this program; if not, write to the Free Software
 *       Foundation, Inc., 51 Franklin Street, Fifth Floor, Boston,
 *       MA 02110-1301, USA.
 */

#ifndef GENERALIZED_HIDDEN_MARKOV_MODEL_H
#define GENERALIZED_HIDDEN_MARKOV_MODEL_H

#include "crossplatform.hpp"

#include <set>

#include "DiscreteIIDModel.hpp"
#include "ProbabilisticModel.hpp"
#include "Sequence.hpp"
#include "Alphabet.hpp"
#include "DecodableModel.hpp"
#include "GHMMStates.hpp"
#include "util.hpp"
#include "SparseMatrix.hpp"

namespace tops {


  //! This is a class representing Hidden semi-Markov Models
  class DLLEXPORT GeneralizedHiddenMarkovModel: public DecodableModel {
  private:
      Matrix _alpha;
      Sequence _last;
      DiscreteIIDModelPtr _last_state_probabilities;
      DiscreteIIDModelPtr _duration_state_probabilities;
    DiscreteIIDModelPtr _initial_probabilities;
    DiscreteIIDModelPtr _terminal_probabilities;
    GHMMStates _all_states;
    AlphabetPtr _state_names;
    int _nclasses;
    GHMMStates _geometric_duration_states;
    GHMMSignalStates _signal_states;
    GHMMExplicitDurationStates _explicit_duration_states;
    void initialize_prefix_sum_arrays(const Sequence & s) const;
    void buildDoubleParameterValue(DiscreteIIDModelPtr distr, ProbabilisticModelParameters & answer, const char *) const;
    void restore_model(std::string & model_name, const ProbabilisticModelParameters & parameters);
    std::map<std::string, ProbabilisticModelPtr> _models;
  public:
    GeneralizedHiddenMarkovModel() {
    }

    virtual ~GeneralizedHiddenMarkovModel() {
    }

    void fixStatesPredecessorSuccessor();

    virtual double inefficient_forward(const Sequence & s, Matrix &alpha) const;

    virtual std::string print_graph () const ;

    //! Forward algorithm
    virtual double forward(const Sequence & s, Matrix &alpha) const;

    //! Backward algorithm
    virtual double backward(const Sequence & s, Matrix &beta) const;

    virtual void posteriorProbabilitiesWithClasses (const Sequence &s, SparseMatrixPtr probabilities) const;

    virtual void posteriorProbabilitiesNoClasses (const Sequence &s, fMatrix &probabilities) const;
    void posteriorProbabilities(const Sequence &s, fMatrix &postProbs) const;


    float MEAPred(const Sequence &s, Sequence &path);
    float MEAPred(const Sequence &s, Sequence &path, SparseMatrixPtr ppPred);


    virtual void setNumClasses(int nclasses);

    virtual int getNumClasses();

    //! Viterbi algorithm
    virtual double
    viterbi(const Sequence &s, Sequence &path, Matrix & gamma) const;

      //! Choose a path given a sequence_length
      virtual void choosePath(const Sequence &s, Sequence &path) ;

      virtual void initializeChoosePathAlgorithm(const Sequence &s);

    //! Inefficient Viterbi algorithm
    virtual double _viterbi(const Sequence &s, Sequence &path, Matrix & gamma) const;

    //! Choose the observation given a state
    virtual Sequence & chooseObservation(Sequence & h, int i, int state) const;

    //! Choose a state
    virtual int chooseState(int state) const;

    //! Choose the initial state
    virtual int chooseFirstState() const;

    //! Choose the initial state
    virtual DiscreteIIDModelPtr getInitialProbabilities() const {
      return _initial_probabilities;
    }

    //! Get state name
    virtual std::string getStateName(int state) const;

    //! Get the state names
    virtual AlphabetPtr getStateNames() const;
    virtual std::string model_name() const {
      return "GeneralizedHiddenMarkovModel";
    }

    virtual ProbabilisticModelCreatorPtr getFactory() const;
    virtual std::string str() const;

    virtual DecodableModel * decodable() {
      return this;
    }
    int configureExplicitDurationState(std::string observation_model_name, DiscreteIIDModelPtr transition_distr,
               std::string duration_model_name, std::string state_name, int iphase, int ophase, std::vector<int> classes);

    int configureSignalState(std::string observation_model_name,
           DiscreteIIDModelPtr transition_distr,
           int size, std::string state_name, int iphase, int ophase, std::vector<int> classes);

    int configureGeometricDurationState(std::string observation_model_name,
                                         DiscreteIIDModelPtr transition_distr,
          std::string state_name, int iphase, int ophase, std::vector<int> classes);
    void setInitialProbability(DiscreteIIDModelPtr init);
    void setTerminalProbability(DiscreteIIDModelPtr term);
    void setObservationSymbols(AlphabetPtr obs) {
      setAlphabet(obs);
    }
    void setStateNames(AlphabetPtr alphabet);
    virtual ProbabilisticModelParameters parameters() const ;
    virtual void initialize(const ProbabilisticModelParameters & p) ;


  };

  typedef boost::shared_ptr<GeneralizedHiddenMarkovModel>
  GeneralizedHiddenMarkovModelPtr;
}
#endif
