# Supplementary material for: ToPS: A Framework to Manipulate Probabilistic Models of Sequence Data
Source: PLoS Comput Biol. 2013 Oct 3;9(10):e1003234. doi: 10.1371/journal.pcbi.1003234 (PMC3789777; doi:10.1371/journal.pcbi.1003234)
Supplement: Software S1 — Source code for ToPS. A compressed file containing the source code for ToPS. (GZ) [file pcbi.1003234.s001.gz › tops/src/HiddenMarkovModel.cpp]

/*
 *       HiddenMarkovModel.cpp
 *
 *       Copyright 2011 Andre Yoshiaki Kashiwabara <akashiwabara@usp.br>
 *                      �gor Bonadio <ibonadio@ime.usp.br>
 *                      Vitor Onuchic <vitoronuchic@gmail.com>
 *                      Alan Mitchell Durham <aland@usp.br>
 *
 *       This program is free software; you can redistribute it and/or modify
 *       it under the terms of the GNU  General Public License as published by
 *       the Free Software Foundation; either version 3 of the License, or
 *       (at your option) any later version.
 *
 *       This program is distributed in the hope that it will be useful,
 *       but WITHOUT ANY WARRANTY; without even the implied warranty of
 *       MERCHANTABILITY or FITNESS FOR A PARTICULAR PURPOSE.  See the
 *       GNU General Public License for more details.
 *
 *       You should have received a copy of the GNU General Public License
 *       along with this program; if not, write to the Free Software
 *       Foundation, Inc., 51 Franklin Street, Fifth Floor, Boston,
 *       MA 02110-1301, USA.
 */

#include <boost/numeric/ublas/matrix.hpp>
#include "Alphabet.hpp"
#include "HiddenMarkovModel.hpp"
#include "ProbabilisticModelParameter.hpp"
#include "Symbol.hpp"
#include <iostream>
#include <cmath>
#include <sstream>
#include <vector>
#include <iterator>
#include <stdio.h>

namespace tops {
  std::string HiddenMarkovModel::getStateName(int state) const{
      return getState(state)->getName()->name();
    }

  Sequence &  HiddenMarkovModel::chooseObservation ( Sequence & h, int i, int state) const
  {
    if((state >= 0) && (!getState(state)->isSilent() ))
      return getState(state)->emission()->chooseWithHistory(h,i,1);
    return h;
  }
  int HiddenMarkovModel::chooseState(int state) const
  {
    return getState(state) ->transitions()->choose();
  }
  int HiddenMarkovModel::chooseFirstState() const
  {
    return _initial_probability->choose();
  }

  double HiddenMarkovModel::forward(const Sequence & sequence, Matrix &a) const
  {
    int nstates = _states.size();
    int size = sequence.size();
    Matrix alpha (nstates, size);
    for(int k = 0; k < nstates; k++)
      alpha(k,0) = _initial_probability->log_probability_of(k) + getState(k)->emission()->log_probability_of(sequence[0]);

    for (int t = 0; t < size-1; t++)
      {
        for(int i = 0; i < nstates; i++)     {
          int j  = 0;
          if(j < nstates){
            alpha(i,t+1) =  alpha(j, t) + getState(j)->transitions()->log_probability_of(i);
            for( j = 1; j < nstates; j++)
              alpha(i, t+1) = log_sum_2(alpha(i,t+1), alpha(j, t) + getState(j)->transitions()->log_probability_of(i));
          }
          alpha(i,t+1) += getState(i)->emission()->log_probability_of(sequence[t+1]);

        }
      }
    a = alpha;
    double sum =  alpha(0, size-1);
    for(int k = 1; k < nstates; k++)
      sum = log_sum_2(sum, alpha(k, size-1));
    return sum;
  }

    //! Backward algorithm
  double HiddenMarkovModel::backward(const Sequence & sequence, Matrix &b) const
  {
    int nstates = _states.size();
    int size = sequence.size();
    Matrix beta (nstates, size);
    for(int k = 0; k < nstates; k++)
      beta(k,size-1) = 0.0;
    for (int t = size-2; t >= 0; t--)
      {

        for(int i = 0; i < nstates; i++)
          {
            int j = 0;
            if(j < nstates) {
              beta(i,t) =  getState(i)->transitions()->log_probability_of(j) + getState(j)->emission()->log_probability_of(sequence[t+1]) + beta(j, t+1);
              for(j = 1; j < nstates; j++)
                beta(i, t) = log_sum_2(beta(i, t), getState(i)->transitions()->log_probability_of(j) + getState(j)->emission()->log_probability_of(sequence[t+1]) + beta(j, t+1));
            }
          }
      }
    b = beta;
    double sum = -HUGE;
    for(int k = 0; k < nstates; k++)
      sum = log_sum_2(sum, beta(k, 0) + _initial_probability->log_probability_of(k) + getState(k)->emission()->log_probability_of(sequence[0]));
    return sum;

  }

    //! Viterbi algorithm
  double HiddenMarkovModel::viterbi (const Sequence &sequence, Sequence &path, Matrix & viterbi) const
  {
    typedef boost::numeric::ublas::matrix<int> MatrixInt;
    int nstates = _states.size();
    int size =  sequence.size();

    Matrix gamma (nstates, size+1);
    MatrixInt psi (nstates, size+1);

    for(int k = 0; k < nstates; k++)
      gamma(k,0) = _initial_probability->log_probability_of(k) + getState(k)->emission()->log_probability_of(sequence[0]);

    for (int i = 0; i < size-1; i++)
      {
        for(int k = 0; k < nstates; k++)     {
          gamma(k,i+1) =  gamma(0, i) +getState(0)->transitions()->log_probability_of(k);
          psi(k,i+1) = 0;
          for(int p = 1; p < nstates; p++) { // p is the predecessor
            double v = gamma(p, i) + getState(p)->transitions()->log_probability_of(k); //
            if(gamma(k, i+1) < v)
              {
                gamma(k, i+1) = v;
                psi(k,i+1) = p;
              }
          }
          gamma(k,i+1) += getState(k)->emission()->log_probability_of(sequence[i+1]);
        }
      }

    viterbi = gamma;
    int L = size-1;
    path.resize(L+1);
    double max = gamma(0, L);
    path[L] = 0;
    for(int k = 1; k < nstates; k++)
      if(max < gamma(k, L)) {
        max = gamma(k,L);
        path[L] = k;
      }
    for(int i = L; i >= 1; i--) {
      path[i-1] = psi(path[i], i);
    }
    for(int i = 0; i < L; i++) {
      path[i] = path[i+1];
    }
    for(int i = 0; i < L; i++) {
      path[i] = getState(path[i+1])->getName()->id();
    }
    return max;

  }

  void HiddenMarkovModel::scale(std::vector<double> & in,  int t)
  {
    double sum = 0.0;
    for(int i = 0; i < (int)in.size(); i++)
      {
        sum += in[i];
      }
    _ctFactors[t] = sum;
    for(int i = 0; i < (int) in.size(); i++)
      {
        in[i] = in[i]/sum;
      }
  }


  void HiddenMarkovModel::trainBaumWelch(SequenceList & sample, int maxiterations, double diff_threshold)
  {
    int nstates = _states.size();
    int alphabet_size = alphabet()->size();


    double diff  = 10.0;
    if(maxiterations < 0)
      maxiterations = 500;

    for(int s = 0; s < (int)sample.size(); s++)
      {
        double last =10000;
        for(int iterations = 0; iterations < maxiterations; iterations++)
          {

            Matrix A (nstates, nstates);
            Matrix E (nstates,alphabet_size);
            Matrix pi (nstates, 1);

            Matrix alpha(nstates, sample[s].size());
            Matrix beta(nstates, sample[s].size());

            double P = forward(sample[s], alpha);

            double sum = alpha(0, 0) + beta(0, 0);
            for(int i = 1; i < nstates; i++)
              sum = log_sum_2(sum, alpha(i,0) + beta(i,0));

            for(int i = 0; i < nstates; i++){
              pi(i, 0) = alpha(i, 0) + beta(i, 0) - sum;
            }

            for(int i = 0; i < nstates; i++)
              {
                for(int j = 0; j < nstates; j++)
                  {
                    int t = 0;
                    double sum = -HUGE;
                    if(t < (int)sample[s].size()-1) {
                      sum = alpha(i, t) + getState(i)->transitions()->log_probability_of(j) + getState(j)->emission()-> log_probability_of(sample[s][t+1]) + beta(j, t+1);
                      for( t = 1; t < (int)sample[s].size()-1; t++)
                        {
                          sum = log_sum_2(sum, alpha(i, t) + getState(i)->transitions()->log_probability_of(j) + getState(j)->emission()-> log_probability_of(sample[s][t+1]) + beta(j, t+1));
                        }
                    }
                    A(i,j) =  sum;
                  }
                for(int sigma = 0; sigma < alphabet_size; sigma++)
                  {
                    int t = 0;
                    double sum = -HUGE;
                    bool first = true;
                    for(t = 0; t < (int)sample[s].size(); t++)
                      {
                        if((sigma == sample[s][t]) && first){
                          sum =  alpha(i, t) + beta(i,t);
                          first = false;
                        }else if(sigma == sample[s][t]) {
                          sum  = log_sum_2(sum, alpha(i,t) + beta(i,t));
                        }
                      }
                    E(i, sigma) =  sum ;
                  }
              }


            Matrix sumA(1, nstates);
            Matrix sumE(1, alphabet_size);
            for(int k = 0; k < nstates; k++)
              {
                int l = 0;
                if(l < nstates) {
                  sumA(0, k) = A(k, l);
                  for(l = 1; l < nstates; l++)
                    sumA(0, k) = log_sum_2(sumA(0,k), A(k,l));
                }
                int b = 0;
                if(b < alphabet_size) {
                  sumE(0, k) = E(k,b);
                  for( b = 1; b < alphabet_size; b++)
                    sumE(0, k) = log_sum_2(sumE(0, k), E(k,b));
                }
              }
            std::vector <double> probs;
            probs.resize(nstates);
            for(int k = 0; k < nstates; k++)
              {
                _initial_probability->log_probability_of(k,pi(k,0) );
                for(int l = 0; l < nstates; l++)
                  {
                    A(k,l) = A(k,l) - sumA(0,k);
                    getState(k)->transitions()->log_probability_of(l, A(k,l));
                  }
                for(int b = 0; b <alphabet_size; b++){
                  E(k,b) = E(k,b) - sumE(0,k);
                  getState(k)->emission()->log_probability_of(b, E(k,b));
                }
              }

            diff = fabs(last - P);
#if 0 
            if(diff < diff_threshold)
                break;
#endif
#if 1
            std::cerr << "iteration: " << iterations << std::endl;
            fprintf(stderr, "LL: %lf\n" , P );
            std::cerr << "Diff: " << diff << std::endl;
#endif
            last = P;
          }
      }


  }

  std::string HiddenMarkovModel::str () const
  {
    int nstates = _states.size();
    std::stringstream out;
    out << "model_name = \"" << model_name() << "\"" << std::endl;
    out << "state_names = (" ;
    out << "\"" << getStateName(0) << "\"";
    for(int i = 1; i < (int)getStateNames()->size(); i++)
      out << ",\"" << getStateName(i) << "\"";
    out << ")" << std::endl;

    out << "observation_symbols = (" ;
    out << "\"" << alphabet()->getSymbol(0)->name() << "\"";
    for(int i = 1; i < (int)alphabet()->size(); i++)
      out << ",\"" << alphabet()->getSymbol(i)->name() << "\"";
    out << ")" << std::endl;

    out << "transitions = (" ;
    out << "\"" << getStateName(0) << "\" | \"" << getStateName(0) << "\": " << exp(getState(0)->transitions()->log_probability_of(0)) ;
    for(int i = 0; i < nstates; i++)
      for(int j = 0; j < nstates; j++)
        if((i != 0) || (j != 0))
          out << ";\n \"" << getStateName(j) << "\" | \"" << getStateName(i) << "\": " << exp(getState(i)->transitions()->log_probability_of(j));
    out << ")" << std::endl;


    out << "emission_probabilities = (" ;
    out << "\"" <<  alphabet()->getSymbol(0)->name() << "\" | \"" << getStateName(0) << "\": " << exp(getState(0)->emission()->log_probability_of(0)) ;
    for(int i = 0; i < nstates; i++)
      for(int j = 0; j < (int)alphabet()->size(); j++)
        if((i != 0) || (j != 0))
          out << ";\n \"" << alphabet()->getSymbol(j)->name() << "\" | \"" <<  getStateName(i) << "\": " << exp(getState(i)->emission()->log_probability_of(j));
    out << ")" << std::endl;

    double sum = 0;
    std::vector <double> probs;
    probs.resize(nstates);
    for(int i = 0; i < nstates; i++){
      probs[i] = exp(_initial_probability->log_probability_of(i));
      sum += probs[i];
    }


    out << "initial_probabilities = (";
    out << "\"" << getStateName(0) << "\":  " << probs[0]/sum ;
    for(int i = 1; i < nstates; i++)
      out << ";\n \"" << getStateName(i) << "\": " << probs[i]/sum;
    out << ")" << std::endl;
    return out.str();
  }

  void HiddenMarkovModel::initialize(const ProbabilisticModelParameters & parameters) {
    ProbabilisticModelParameterValuePtr state_names = parameters.getMandatoryParameterValue("state_names");
    ProbabilisticModelParameterValuePtr observation_symbols = parameters.getMandatoryParameterValue("observation_symbols");
    ProbabilisticModelParameterValuePtr initial_probabilities = parameters.getMandatoryParameterValue("initial_probabilities");
    ProbabilisticModelParameterValuePtr transitions = parameters.getMandatoryParameterValue("transitions");
    ProbabilisticModelParameterValuePtr emissions = parameters.getMandatoryParameterValue("emission_probabilities");

    std::vector<HMMStatePtr> state_list;
    AlphabetPtr states = AlphabetPtr(new Alphabet());
    AlphabetPtr observations = AlphabetPtr(new Alphabet());
    states->initializeFromVector(state_names->getStringVector());
    observations->initializeFromVector(observation_symbols->getStringVector());

    std::map<std::string,double>::const_iterator it;
    std::map<std::string,std::vector<double> >::const_iterator it2;

    DiscreteIIDModelPtr pi = DiscreteIIDModelPtr(new DiscreteIIDModel());
    pi->initializeFromMap(initial_probabilities->getDoubleMap(), states);

    std::map<std::string,double> emisspar = emissions->getDoubleMap();
    std::map<std::string,double> transpar = transitions->getDoubleMap();

    std::map<std::string,DoubleVector> emiss;
    std::map<std::string,DoubleVector> trans;


    for(it = emisspar.begin(); it != emisspar.end(); it++)
      {
        std::vector<std::string> splited;
        boost::regex separator("\\s*\\|\\s*");
        split_regex(it->first, splited, separator);
        if(splited.size() == 1)
          splited.push_back("");
        std::string symbol(splited[0]);
        std::string state(splited[1]);


        std::map<std::string,DoubleVector>::iterator eit;
        eit = emiss.find(state);
        if(eit == emiss.end())
          {
            int id = observations->getSymbol(symbol)->id();
            emiss[state].resize(observations->size());
            if((id >= 0) && (id < (int)(emiss[state]).size()))
              (emiss[state])[id] = it->second;
          }
        else
          {
            int id = observations->getSymbol(symbol)->id();
            if((id >= 0) && (id < (int)(eit->second).size()))
              (eit->second)[id] = it->second;
          }
      }


    for(it = transpar.begin(); it != transpar.end(); it++)
      {
        std::vector<std::string> splited;
        boost::regex separator("\\|");
        split_regex(it->first, splited, separator);
        if(splited.size() == 1)
          splited.push_back("");

        std::string to(splited[0]);
        std::string from(splited[1]);
        if(trans.find(from) == trans.end())
          {
            int id = states->getSymbol(to)->id();
            DoubleVector probs;
            probs.resize(states->size());
            trans[from]=probs;
            if(id < (int)trans[from].size())
              trans[from][id] = it->second;
          }
        else
          {
            int id = states->getSymbol(to)->id();
            if(id < (int)trans[from].size())
              trans[from][id] = it->second;
          }
      }
    for(unsigned int i = 0; i < states->size(); i++)
      {
        SymbolPtr state_name = states->getSymbol(i);
        DiscreteIIDModelPtr e ;
        DiscreteIIDModelPtr t ;
        it2 = emiss.find(state_name->name());
        if(it2 != emiss.end())
          e = DiscreteIIDModelPtr(new DiscreteIIDModel(it2->second));
        it2 = trans.find(state_name->name());
        if(it2 != trans.end())
          t = DiscreteIIDModelPtr(new DiscreteIIDModel(it2->second));
        else {
          std::cerr << "ERROR: Could not configure the state " << state_name->name() << "!" << std::endl;
          exit(-1);
        }
        HMMStatePtr statePtr = HMMStatePtr(new HMMState(state_list.size(), state_name, e, t));
        state_list.push_back(statePtr);
      }

    setStates(state_list, states);
    setInitialProbability(pi);
    setObservationSymbols(observations);
  }

  ProbabilisticModelParameters HiddenMarkovModel::parameters() const {
    ProbabilisticModelParameters answer;
    int nstates = _states.size();
    answer.add("model_name", StringParameterValuePtr(new StringParameterValue(model_name().c_str())));
    answer.add("state_names", _state_names->getParameterValue());
    answer.add("observation_symbols", alphabet()->getParameterValue());
    std::map <std::string, double> trans;
    std::stringstream out;
    out << getStateName(0) << "|" << getStateName(0) ;
    trans[out.str()] =  exp(getState(0)->transitions()->log_probability_of(0)) ;
    for(int i = 0; i < nstates; i++)
      for(int j = 0; j < nstates; j++)
        if((i != 0) || (j != 0)) {
          std::stringstream out2;
          out2 << getStateName(j) << "|" << getStateName(i) ;
          trans[out2.str()] = exp(getState(i)->transitions()->log_probability_of(j));
        }
    answer.add("transitions", DoubleMapParameterValuePtr(new DoubleMapParameterValue(trans)));

    std::map <std::string, double> emission;
    std::stringstream out3;
    out3 <<   alphabet()->getSymbol(0)->name() << "|" << getStateName(0) ;
    emission[out3.str()] =  exp(getState(0)->emission()->log_probability_of(0));
    for(int i = 0; i < nstates; i++)
      for(int j = 0; j < (int)alphabet()->size(); j++)
        if((i != 0) || (j != 0)){
          std::stringstream out4;
          out4 <<alphabet()->getSymbol(j)->name() << "|" <<  getStateName(i) ;
          emission[out4.str()] =  exp(getState(i)->emission()->log_probability_of(j));
        }
    answer.add("emission_probabilities", DoubleMapParameterValuePtr(new DoubleMapParameterValue(emission)));
    double sum = 0;
    std::vector <double> probs;
    probs.resize(nstates);
    for(int i = 0; i < nstates; i++){
      probs[i] = exp(_initial_probability->log_probability_of(i));
      sum += probs[i];
    }
    std::map <std::string, double> initial;
    std::stringstream out5;
    out5 <<  getStateName(0);
    initial[out5.str()] =  probs[0]/sum;
    for(int i = 0; i < nstates; i++)
      for(int j = 0; j < (int)alphabet()->size(); j++)
        if((i != 0) || (j != 0)){
          std::stringstream out6;
          out6 << getStateName(i);
          initial[out6.str()] = probs[i]/sum;
        }
    answer.add("initial_probabilities", DoubleMapParameterValuePtr(new DoubleMapParameterValue(initial)));
    return answer;

  }


  void HiddenMarkovModel::setInitialProbability(DiscreteIIDModelPtr initial) {
    _initial_probability = initial;
  }
  void HiddenMarkovModel::setObservationSymbols(AlphabetPtr obs) {
    tops::ProbabilisticModel::setAlphabet(obs);
  }
  void HiddenMarkovModel::setStates(std::vector<HMMStatePtr> states, AlphabetPtr state_names) {
    _states = states;
    _state_names = state_names;
  }

}
