# Supplementary material for: ToPS: A Framework to Manipulate Probabilistic Models of Sequence Data
Source: PLoS Comput Biol. 2013 Oct 3;9(10):e1003234. doi: 10.1371/journal.pcbi.1003234 (PMC3789777; doi:10.1371/journal.pcbi.1003234)
Supplement: Software S1 — Source code for ToPS. A compressed file containing the source code for ToPS. (GZ) [file pcbi.1003234.s001.gz › tops/src/HiddenMarkovModelCreator.hpp]

/*
 *       HiddenMarkovModelCreator.hpp
 *
 *       Copyright 2011 Andre Yoshiaki Kashiwabara <akashiwabara@usp.br>
 *                      �gor Bonadio <ibonadio@ime.usp.br>
 *                      Vitor Onuchic <vitoronuchic@gmail.com>
 *                      Alan Mitchell Durham <aland@usp.br>
 *
 *       This program is free software; you can redistribute it and/or modify
 *       it under the terms of the GNU  General Public License as published by
 *       the Free Software Foundation; either version 3 of the License, or
 *       (at your option) any later version.
 *
 *       This program is distributed in the hope that it will be useful,
 *       but WITHOUT ANY WARRANTY; without even the implied warranty of
 *       MERCHANTABILITY or FITNESS FOR A PARTICULAR PURPOSE.  See the
 *       GNU General Public License for more details.
 *
 *       You should have received a copy of the GNU General Public License
 *       along with this program; if not, write to the Free Software
 *       Foundation, Inc., 51 Franklin Street, Fifth Floor, Boston,
 *       MA 02110-1301, USA.
 */

#ifndef HIDDEN_MARKOV_MODEL_CREATOR_HPP
#define HIDDEN_MARKOV_MODEL_CREATOR_HPP

#include "crossplatform.hpp"

#include "ProbabilisticModelCreator.hpp"
#include "ProbabilisticModel.hpp"
#include <boost/shared_ptr.hpp>

namespace tops {
  //! This class is  a factory for the finite discrete distribution
  class DLLEXPORT HiddenMarkovModelCreator : public ProbabilisticModelCreator
  {
  public:
    HiddenMarkovModelCreator() {}
    virtual ~HiddenMarkovModelCreator(){};
    virtual ProbabilisticModelPtr create(ProbabilisticModelParameters & parameters) const ;

    virtual std::string help() const
    {
      std::stringstream out;
      out << "\nUSAGE: " << std::endl;
      out << "Mandatory parameters: " << std::endl;
      out << "\tstate_names" << std::endl;
      out << "\tobservation_symbols" << std::endl;
      out << "\tinitial_probabilities" << std::endl;
      out << "\ttransitions" << std::endl;
      out << "\temission_probabilities" << std::endl;
      out << "Example: " << std::endl;
      out << "\tmodel_name = \"HiddenMarkovModel\"" << std::endl;
      out << "\tstate_names = (\"F\",\"L\")" << std::endl;
      out << "\tobservation_symbols = (\"1\",\"2\",\"3\",\"4\",\"5\",\"6\")" << std::endl;
      out << "\ttransitions = (\"F\" | \"F\": 0.7;" << std::endl;
      out << "\t \"L\" | \"F\": 0.3;" << std::endl;
      out << "\t \"F\" | \"L\": 0.3;" << std::endl;
      out << "\t \"L\" | \"L\": 0.7)" << std::endl;
      out << "\temissions = (\"1\" | \"F\": 0.166667;" << std::endl;
      out << "\t             \"2\" | \"F\": 0.166667;" << std::endl;
      out << "\t             \"3\" | \"F\": 0.166667;" << std::endl;
      out << "\t             \"4\" | \"F\": 0.166667;" << std::endl;
      out << "\t             \"5\" | \"F\": 0.166667;" << std::endl;
      out << "\t             \"6\" | \"F\": 0.166667;" << std::endl;
      out << "\t             \"1\" | \"L\": 0.5;" << std::endl;
      out << "\t             \"2\" | \"L\": 0.1;" << std::endl;
      out << "\t             \"3\" | \"L\": 0.1;" << std::endl;
      out << "\t             \"4\" | \"L\": 0.1;" << std::endl;
      out << "\t             \"5\" | \"L\": 0.1;" << std::endl;
      out << "\t             \"6\" | \"L\": 0.1)" << std::endl;
      out << "\tinitial_probabilities = (\"F\":  0.5;" << std::endl;
      out << "\t \"L\": 0.5)" << std::endl;
      return out.str();
    }


  };
  typedef boost::shared_ptr < HiddenMarkovModelCreator> HiddenMarkovModelCreatorPtr;
}

#endif
