# Supplementary material for: ToPS: A Framework to Manipulate Probabilistic Models of Sequence Data
Source: PLoS Comput Biol. 2013 Oct 3;9(10):e1003234. doi: 10.1371/journal.pcbi.1003234 (PMC3789777; doi:10.1371/journal.pcbi.1003234)
Supplement: Software S1 — Source code for ToPS. A compressed file containing the source code for ToPS. (GZ) [file pcbi.1003234.s001.gz › tops/src/InhomogeneousFactorableModel.cpp]

/*
 *       InhomogeneousFactorableModel.cpp
 *
 *       Copyright 2011 Andre Yoshiaki Kashiwabara <akashiwabara@usp.br>
 *                      �gor Bonadio <ibonadio@ime.usp.br>
 *                      Vitor Onuchic <vitoronuchic@gmail.com>
 *                      Alan Mitchell Durham <aland@usp.br>
 *
 *       This program is free software; you can redistribute it and/or modify
 *       it under the terms of the GNU  General Public License as published by
 *       the Free Software Foundation; either version 3 of the License, or
 *       (at your option) any later version.
 *
 *       This program is distributed in the hope that it will be useful,
 *       but WITHOUT ANY WARRANTY; without even the implied warranty of
 *       MERCHANTABILITY or FITNESS FOR A PARTICULAR PURPOSE.  See the
 *       GNU General Public License for more details.
 *
 *       You should have received a copy of the GNU General Public License
 *       along with this program; if not, write to the Free Software
 *       Foundation, Inc., 51 Franklin Street, Fifth Floor, Boston,
 *       MA 02110-1301, USA.
 */

#include "InhomogeneousFactorableModel.hpp"
#include "Symbol.hpp"
namespace tops {

  double InhomogeneousFactorableModel::evaluate(const Sequence & s, unsigned int begin, unsigned int end) const
  {
    double result = 0.0;
    int t = 0;
    int maximumTime = maximumTimeValue();
    for (int i = (int) begin; (i <= (int) end); i++) {
      if (((i - (int) begin) > maximumTime)
          && (!isPhased()))
        break;
      result += evaluatePosition(s, i, t);
      t = mod(t + 1, maximumTime + 1);
    }
    return result;
  }


  double InhomogeneousFactorableModel::evaluate(const Sequence & s, unsigned int begin, unsigned int end, int phase) const
  {
    double result = 0.0;
    if(isPhased()) {
        int t = phase;
        int maximumTime = maximumTimeValue();
        for (int i = (int) begin; (i <= (int) end); i++) {
            if (((i - (int) begin) > maximumTime)
                && (!isPhased()))
                break;
            result += evaluatePosition(s, i, t);
        t = mod(t + 1, maximumTime + 1);
        }
        return result;
    }
    else
        return evaluate(s, begin, end);
  }


  Sequence & InhomogeneousFactorableModel::choose(Sequence & h, int size) const
  {
    chooseWithHistory(h,0,size);
    return h;
  }

  Sequence & InhomogeneousFactorableModel::chooseWithHistory(Sequence & h, int i, int size) const
  {
    chooseWithHistory(h,i,0,size);
    return h;
  }

  double InhomogeneousFactorableModel::prefix_sum_array_compute(int begin, int end, int phase) {
    if (isPhased()) {
      int nphase = maximumTimeValue()+1;
      int p = mod(begin, nphase);
      int k = 0;
      if(begin < 0)
          return -HUGE;
      while ((phase >= 0) && (mod(p + k, nphase) != phase))
        k++;
      p = k;

      if ((end + 1) >= (int) _precision[p].size())
        end = _precision[p].size() - 2;
      double t = _precision[p][end + 1] - _precision[p][begin];
      if ((t > 0) || (begin > end))
        return -HUGE;
      if(_alpha[p][end + 1] - _alpha[p][begin] > 0)
        {
            std::cerr << "ERROR: InhomogeneousFactorableModel " << begin << " " << end << " " << _alpha[p][end + 1] << " " <<  _alpha[p][begin] << " " << t << std::endl;
        }
      assert(_alpha[p][end + 1] - _alpha[p][begin] <= 0);

      return _alpha[p][end + 1] - _alpha[p][begin];
    } else {
      if ((begin < (int) _scores.size()) && (begin >= 0))
        return _scores[begin];
      return -HUGE;
    }

  }
  double InhomogeneousFactorableModel::prefix_sum_array_compute(int begin, int end)
  {
    return prefix_sum_array_compute(begin, end, 0);
  }

  bool InhomogeneousFactorableModel::initialize_prefix_sum_array(const Sequence & s, int phase)
  {
    if(ProbabilisticModel::initialize_prefix_sum_array(s))
      return true;

    if (isPhased())
      {


        _phase = phase;
        int nphases = maximumTimeValue()+1;
        _alpha.resize(nphases);
        _precision.resize(nphases);
        for (int k = 0; k < nphases; k++) {
          _alpha[k].resize(s.size() + 1);
          _precision[k].resize(s.size() + 1);
        }
        for (int k = 0; k < nphases; k++) {
          _alpha[k][0] = 0;
          _precision[k][0] = 0;
          for (int i = 0; i < (int) s.size(); i++) {
            int p = mod(i + k, nphases);
            double prob = evaluatePosition(s, i, p);
            if ((prob != prob) || close(prob, -HUGE, 1e-10)) {
              _precision[k][i + 1] = _precision[k][i] + 1;
              _alpha[k][i + 1] = 0;
            } else {
              _precision[k][i + 1] = _precision[k][i];
              _alpha[k][i + 1] = _alpha[k][i] + prob;
            }
#if 0
            std::cerr << i << " " << alphabet()->getSymbol(s[i])->name() << " " << k << " " << p << " " << prob << " " << _alpha[k][i] << " " << _precision[k][i] << " " << std::endl;
#endif
          }

        }

      }
    else {
      _scores.resize(s.size());
      for (int i = 0; i < (int) s.size(); i++)
        _scores[i] = evaluate(s, i, s.size() - 1);
    }
    return true;
  }

  Sequence & InhomogeneousFactorableModel::chooseWithHistory(Sequence & h, int i,  int initial_phase, int size) const{
    int maximumTime = maximumTimeValue();
    int t = initial_phase;
    if(t < 0) t = 0;
    if(isPhased())
      t = mod(initial_phase, maximumTime+1);
    if((size  > maximumTime) && !isPhased())
      size = maximumTime+1;

    for(int k = i; (k < (size+i)); k++)
      {
        if( (t >  maximumTime) && (!isPhased()))
          break;
        if(k < (int)h.size())
          h[k] = choosePosition(h, k, t);
        else
          h.push_back(choosePosition(h, k,t));
        t = mod(t+1, maximumTime+1);
      }
    return h;

  }
}
