# Supplementary material for: ToPS: A Framework to Manipulate Probabilistic Models of Sequence Data
Source: PLoS Comput Biol. 2013 Oct 3;9(10):e1003234. doi: 10.1371/journal.pcbi.1003234 (PMC3789777; doi:10.1371/journal.pcbi.1003234)
Supplement: Software S1 — Source code for ToPS. A compressed file containing the source code for ToPS. (GZ) [file pcbi.1003234.s001.gz › tops/src/Makefile]

# CMAKE generated file: DO NOT EDIT!
# Generated by "Unix Makefiles" Generator, CMake Version 2.8

# Default target executed when no arguments are given to make.
default_target: all
.PHONY : default_target

#=============================================================================
# Special targets provided by cmake.

# Disable implicit rules so canonical targets will work.
.SUFFIXES:

# Remove some rules from gmake that .SUFFIXES does not remove.
SUFFIXES =

.SUFFIXES: .hpux_make_needs_suffix_list

# Suppress display of executed commands.
$(VERBOSE).SILENT:

# A target that is always out of date.
cmake_force:
.PHONY : cmake_force

#=============================================================================
# Set environment variables for the build.

# The shell in which to execute make rules.
SHELL = /bin/sh

# The CMake executable.
CMAKE_COMMAND = "/Applications/CMake 2.8-10.app/Contents/bin/cmake"

# The command to remove a file.
RM = "/Applications/CMake 2.8-10.app/Contents/bin/cmake" -E remove -f

# Escaping for special characters.
EQUALS = =

# The program to use to edit the cache.
CMAKE_EDIT_COMMAND = "/Applications/CMake 2.8-10.app/Contents/bin/ccmake"

# The top-level source directory on which CMake was run.
CMAKE_SOURCE_DIR = /Users/yoshiaki/tmp/tops

# The top-level build directory on which CMake was run.
CMAKE_BINARY_DIR = /Users/yoshiaki/tmp/tops

#=============================================================================
# Targets provided globally by CMake.

# Special rule for the target edit_cache
edit_cache:
	@$(CMAKE_COMMAND) -E cmake_echo_color --switch=$(COLOR) --cyan "Running CMake cache editor..."
	"/Applications/CMake 2.8-10.app/Contents/bin/ccmake" -H$(CMAKE_SOURCE_DIR) -B$(CMAKE_BINARY_DIR)
.PHONY : edit_cache

# Special rule for the target edit_cache
edit_cache/fast: edit_cache
.PHONY : edit_cache/fast

# Special rule for the target install
install: preinstall
	@$(CMAKE_COMMAND) -E cmake_echo_color --switch=$(COLOR) --cyan "Install the project..."
	"/Applications/CMake 2.8-10.app/Contents/bin/cmake" -P cmake_install.cmake
.PHONY : install

# Special rule for the target install
install/fast: preinstall/fast
	@$(CMAKE_COMMAND) -E cmake_echo_color --switch=$(COLOR) --cyan "Install the project..."
	"/Applications/CMake 2.8-10.app/Contents/bin/cmake" -P cmake_install.cmake
.PHONY : install/fast

# Special rule for the target install/local
install/local: preinstall
	@$(CMAKE_COMMAND) -E cmake_echo_color --switch=$(COLOR) --cyan "Installing only the local directory..."
	"/Applications/CMake 2.8-10.app/Contents/bin/cmake" -DCMAKE_INSTALL_LOCAL_ONLY=1 -P cmake_install.cmake
.PHONY : install/local

# Special rule for the target install/local
install/local/fast: install/local
.PHONY : install/local/fast

# Special rule for the target install/strip
install/strip: preinstall
	@$(CMAKE_COMMAND) -E cmake_echo_color --switch=$(COLOR) --cyan "Installing the project stripped..."
	"/Applications/CMake 2.8-10.app/Contents/bin/cmake" -DCMAKE_INSTALL_DO_STRIP=1 -P cmake_install.cmake
.PHONY : install/strip

# Special rule for the target install/strip
install/strip/fast: install/strip
.PHONY : install/strip/fast

# Special rule for the target list_install_components
list_install_components:
	@$(CMAKE_COMMAND) -E cmake_echo_color --switch=$(COLOR) --cyan "Available install components are: \"Unspecified\""
.PHONY : list_install_components

# Special rule for the target list_install_components
list_install_components/fast: list_install_components
.PHONY : list_install_components/fast

# Special rule for the target rebuild_cache
rebuild_cache:
	@$(CMAKE_COMMAND) -E cmake_echo_color --switch=$(COLOR) --cyan "Running CMake to regenerate build system..."
	"/Applications/CMake 2.8-10.app/Contents/bin/cmake" -H$(CMAKE_SOURCE_DIR) -B$(CMAKE_BINARY_DIR)
.PHONY : rebuild_cache

# Special rule for the target rebuild_cache
rebuild_cache/fast: rebuild_cache
.PHONY : rebuild_cache/fast

# Special rule for the target test
test:
	@$(CMAKE_COMMAND) -E cmake_echo_color --switch=$(COLOR) --cyan "Running tests..."
	"/Applications/CMake 2.8-10.app/Contents/bin/ctest" --force-new-ctest-process $(ARGS)
.PHONY : test

# Special rule for the target test
test/fast: test
.PHONY : test/fast

# The main all target
all: cmake_check_build_system
	cd /Users/yoshiaki/tmp/tops && $(CMAKE_COMMAND) -E cmake_progress_start /Users/yoshiaki/tmp/tops/CMakeFiles /Users/yoshiaki/tmp/tops/src/CMakeFiles/progress.marks
	cd /Users/yoshiaki/tmp/tops && $(MAKE) -f CMakeFiles/Makefile2 src/all
	$(CMAKE_COMMAND) -E cmake_progress_start /Users/yoshiaki/tmp/tops/CMakeFiles 0
.PHONY : all

# The main clean target
clean:
	cd /Users/yoshiaki/tmp/tops && $(MAKE) -f CMakeFiles/Makefile2 src/clean
.PHONY : clean

# The main clean target
clean/fast: clean
.PHONY : clean/fast

# Prepare targets for installation.
preinstall: all
	cd /Users/yoshiaki/tmp/tops && $(MAKE) -f CMakeFiles/Makefile2 src/preinstall
.PHONY : preinstall

# Prepare targets for installation.
preinstall/fast:
	cd /Users/yoshiaki/tmp/tops && $(MAKE) -f CMakeFiles/Makefile2 src/preinstall
.PHONY : preinstall/fast

# clear depends
depend:
	cd /Users/yoshiaki/tmp/tops && $(CMAKE_COMMAND) -H$(CMAKE_SOURCE_DIR) -B$(CMAKE_BINARY_DIR) --check-build-system CMakeFiles/Makefile.cmake 1
.PHONY : depend

# Convenience name for target.
src/CMakeFiles/ToPS.dir/rule:
	cd /Users/yoshiaki/tmp/tops && $(MAKE) -f CMakeFiles/Makefile2 src/CMakeFiles/ToPS.dir/rule
.PHONY : src/CMakeFiles/ToPS.dir/rule

# Convenience name for target.
ToPS: src/CMakeFiles/ToPS.dir/rule
.PHONY : ToPS

# fast build rule for target.
ToPS/fast:
	cd /Users/yoshiaki/tmp/tops && $(MAKE) -f src/CMakeFiles/ToPS.dir/build.make src/CMakeFiles/ToPS.dir/build
.PHONY : ToPS/fast

AkaikeInformationCriteria.o: AkaikeInformationCriteria.cpp.o
.PHONY : AkaikeInformationCriteria.o

# target to build an object file
AkaikeInformationCriteria.cpp.o:
	cd /Users/yoshiaki/tmp/tops && $(MAKE) -f src/CMakeFiles/ToPS.dir/build.make src/CMakeFiles/ToPS.dir/AkaikeInformationCriteria.cpp.o
.PHONY : AkaikeInformationCriteria.cpp.o

AkaikeInformationCriteria.i: AkaikeInformationCriteria.cpp.i
.PHONY : AkaikeInformationCriteria.i

# target to preprocess a source file
AkaikeInformationCriteria.cpp.i:
	cd /Users/yoshiaki/tmp/tops && $(MAKE) -f src/CMakeFiles/ToPS.dir/build.make src/CMakeFiles/ToPS.dir/AkaikeInformationCriteria.cpp.i
.PHONY : AkaikeInformationCriteria.cpp.i

AkaikeInformationCriteria.s: AkaikeInformationCriteria.cpp.s
.PHONY : AkaikeInformationCriteria.s

# target to generate assembly for a file
AkaikeInformationCriteria.cpp.s:
	cd /Users/yoshiaki/tmp/tops && $(MAKE) -f src/CMakeFiles/ToPS.dir/build.make src/CMakeFiles/ToPS.dir/AkaikeInformationCriteria.cpp.s
.PHONY : AkaikeInformationCriteria.cpp.s

Alphabet.o: Alphabet.cpp.o
.PHONY : Alphabet.o

# target to build an object file
Alphabet.cpp.o:
	cd /Users/yoshiaki/tmp/tops && $(MAKE) -f src/CMakeFiles/ToPS.dir/build.make src/CMakeFiles/ToPS.dir/Alphabet.cpp.o
.PHONY : Alphabet.cpp.o

Alphabet.i: Alphabet.cpp.i
.PHONY : Alphabet.i

# target to preprocess a source file
Alphabet.cpp.i:
	cd /Users/yoshiaki/tmp/tops && $(MAKE) -f src/CMakeFiles/ToPS.dir/build.make src/CMakeFiles/ToPS.dir/Alphabet.cpp.i
.PHONY : Alphabet.cpp.i

Alphabet.s: Alphabet.cpp.s
.PHONY : Alphabet.s

# target to generate assembly for a file
Alphabet.cpp.s:
	cd /Users/yoshiaki/tmp/tops && $(MAKE) -f src/CMakeFiles/ToPS.dir/build.make src/CMakeFiles/ToPS.dir/Alphabet.cpp.s
.PHONY : Alphabet.cpp.s

BayesianInformationCriteria.o: BayesianInformationCriteria.cpp.o
.PHONY : BayesianInformationCriteria.o

# target to build an object file
BayesianInformationCriteria.cpp.o:
	cd /Users/yoshiaki/tmp/tops && $(MAKE) -f src/CMakeFiles/ToPS.dir/build.make src/CMakeFiles/ToPS.dir/BayesianInformationCriteria.cpp.o
.PHONY : BayesianInformationCriteria.cpp.o

BayesianInformationCriteria.i: BayesianInformationCriteria.cpp.i
.PHONY : BayesianInformationCriteria.i

# target to preprocess a source file
BayesianInformationCriteria.cpp.i:
	cd /Users/yoshiaki/tmp/tops && $(MAKE) -f src/CMakeFiles/ToPS.dir/build.make src/CMakeFiles/ToPS.dir/BayesianInformationCriteria.cpp.i
.PHONY : BayesianInformationCriteria.cpp.i

BayesianInformationCriteria.s: BayesianInformationCriteria.cpp.s
.PHONY : BayesianInformationCriteria.s

# target to generate assembly for a file
BayesianInformationCriteria.cpp.s:
	cd /Users/yoshiaki/tmp/tops && $(MAKE) -f src/CMakeFiles/ToPS.dir/build.make src/CMakeFiles/ToPS.dir/BayesianInformationCriteria.cpp.s
.PHONY : BayesianInformationCriteria.cpp.s

BernoulliModelCreator.o: BernoulliModelCreator.cpp.o
.PHONY : BernoulliModelCreator.o

# target to build an object file
BernoulliModelCreator.cpp.o:
	cd /Users/yoshiaki/tmp/tops && $(MAKE) -f src/CMakeFiles/ToPS.dir/build.make src/CMakeFiles/ToPS.dir/BernoulliModelCreator.cpp.o
.PHONY : BernoulliModelCreator.cpp.o

BernoulliModelCreator.i: BernoulliModelCreator.cpp.i
.PHONY : BernoulliModelCreator.i

# target to preprocess a source file
BernoulliModelCreator.cpp.i:
	cd /Users/yoshiaki/tmp/tops && $(MAKE) -f src/CMakeFiles/ToPS.dir/build.make src/CMakeFiles/ToPS.dir/BernoulliModelCreator.cpp.i
.PHONY : BernoulliModelCreator.cpp.i

BernoulliModelCreator.s: BernoulliModelCreator.cpp.s
.PHONY : BernoulliModelCreator.s

# target to generate assembly for a file
BernoulliModelCreator.cpp.s:
	cd /Users/yoshiaki/tmp/tops && $(MAKE) -f src/CMakeFiles/ToPS.dir/build.make src/CMakeFiles/ToPS.dir/BernoulliModelCreator.cpp.s
.PHONY : BernoulliModelCreator.cpp.s

ConfigurationReader.o: ConfigurationReader.cpp.o
.PHONY : ConfigurationReader.o

# target to build an object file
ConfigurationReader.cpp.o:
	cd /Users/yoshiaki/tmp/tops && $(MAKE) -f src/CMakeFiles/ToPS.dir/build.make src/CMakeFiles/ToPS.dir/ConfigurationReader.cpp.o
.PHONY : ConfigurationReader.cpp.o

ConfigurationReader.i: ConfigurationReader.cpp.i
.PHONY : ConfigurationReader.i

# target to preprocess a source file
ConfigurationReader.cpp.i:
	cd /Users/yoshiaki/tmp/tops && $(MAKE) -f src/CMakeFiles/ToPS.dir/build.make src/CMakeFiles/ToPS.dir/ConfigurationReader.cpp.i
.PHONY : ConfigurationReader.cpp.i

ConfigurationReader.s: ConfigurationReader.cpp.s
.PHONY : ConfigurationReader.s

# target to generate assembly for a file
ConfigurationReader.cpp.s:
	cd /Users/yoshiaki/tmp/tops && $(MAKE) -f src/CMakeFiles/ToPS.dir/build.make src/CMakeFiles/ToPS.dir/ConfigurationReader.cpp.s
.PHONY : ConfigurationReader.cpp.s

ContextTree.o: ContextTree.cpp.o
.PHONY : ContextTree.o

# target to build an object file
ContextTree.cpp.o:
	cd /Users/yoshiaki/tmp/tops && $(MAKE) -f src/CMakeFiles/ToPS.dir/build.make src/CMakeFiles/ToPS.dir/ContextTree.cpp.o
.PHONY : ContextTree.cpp.o

ContextTree.i: ContextTree.cpp.i
.PHONY : ContextTree.i

# target to preprocess a source file
ContextTree.cpp.i:
	cd /Users/yoshiaki/tmp/tops && $(MAKE) -f src/CMakeFiles/ToPS.dir/build.make src/CMakeFiles/ToPS.dir/ContextTree.cpp.i
.PHONY : ContextTree.cpp.i

ContextTree.s: ContextTree.cpp.s
.PHONY : ContextTree.s

# target to generate assembly for a file
ContextTree.cpp.s:
	cd /Users/yoshiaki/tmp/tops && $(MAKE) -f src/CMakeFiles/ToPS.dir/build.make src/CMakeFiles/ToPS.dir/ContextTree.cpp.s
.PHONY : ContextTree.cpp.s

DecodableModel.o: DecodableModel.cpp.o
.PHONY : DecodableModel.o

# target to build an object file
DecodableModel.cpp.o:
	cd /Users/yoshiaki/tmp/tops && $(MAKE) -f src/CMakeFiles/ToPS.dir/build.make src/CMakeFiles/ToPS.dir/DecodableModel.cpp.o
.PHONY : DecodableModel.cpp.o

DecodableModel.i: DecodableModel.cpp.i
.PHONY : DecodableModel.i

# target to preprocess a source file
DecodableModel.cpp.i:
	cd /Users/yoshiaki/tmp/tops && $(MAKE) -f src/CMakeFiles/ToPS.dir/build.make src/CMakeFiles/ToPS.dir/DecodableModel.cpp.i
.PHONY : DecodableModel.cpp.i

DecodableModel.s: DecodableModel.cpp.s
.PHONY : DecodableModel.s

# target to generate assembly for a file
DecodableModel.cpp.s:
	cd /Users/yoshiaki/tmp/tops && $(MAKE) -f src/CMakeFiles/ToPS.dir/build.make src/CMakeFiles/ToPS.dir/DecodableModel.cpp.s
.PHONY : DecodableModel.cpp.s

DiscreteIIDModel.o: DiscreteIIDModel.cpp.o
.PHONY : DiscreteIIDModel.o

# target to build an object file
DiscreteIIDModel.cpp.o:
	cd /Users/yoshiaki/tmp/tops && $(MAKE) -f src/CMakeFiles/ToPS.dir/build.make src/CMakeFiles/ToPS.dir/DiscreteIIDModel.cpp.o
.PHONY : DiscreteIIDModel.cpp.o

DiscreteIIDModel.i: DiscreteIIDModel.cpp.i
.PHONY : DiscreteIIDModel.i

# target to preprocess a source file
DiscreteIIDModel.cpp.i:
	cd /Users/yoshiaki/tmp/tops && $(MAKE) -f src/CMakeFiles/ToPS.dir/build.make src/CMakeFiles/ToPS.dir/DiscreteIIDModel.cpp.i
.PHONY : DiscreteIIDModel.cpp.i

DiscreteIIDModel.s: DiscreteIIDModel.cpp.s
.PHONY : DiscreteIIDModel.s

# target to generate assembly for a file
DiscreteIIDModel.cpp.s:
	cd /Users/yoshiaki/tmp/tops && $(MAKE) -f src/CMakeFiles/ToPS.dir/build.make src/CMakeFiles/ToPS.dir/DiscreteIIDModel.cpp.s
.PHONY : DiscreteIIDModel.cpp.s

DiscreteIIDModelCreator.o: DiscreteIIDModelCreator.cpp.o
.PHONY : DiscreteIIDModelCreator.o

# target to build an object file
DiscreteIIDModelCreator.cpp.o:
	cd /Users/yoshiaki/tmp/tops && $(MAKE) -f src/CMakeFiles/ToPS.dir/build.make src/CMakeFiles/ToPS.dir/DiscreteIIDModelCreator.cpp.o
.PHONY : DiscreteIIDModelCreator.cpp.o

DiscreteIIDModelCreator.i: DiscreteIIDModelCreator.cpp.i
.PHONY : DiscreteIIDModelCreator.i

# target to preprocess a source file
DiscreteIIDModelCreator.cpp.i:
	cd /Users/yoshiaki/tmp/tops && $(MAKE) -f src/CMakeFiles/ToPS.dir/build.make src/CMakeFiles/ToPS.dir/DiscreteIIDModelCreator.cpp.i
.PHONY : DiscreteIIDModelCreator.cpp.i

DiscreteIIDModelCreator.s: DiscreteIIDModelCreator.cpp.s
.PHONY : DiscreteIIDModelCreator.s

# target to generate assembly for a file
DiscreteIIDModelCreator.cpp.s:
	cd /Users/yoshiaki/tmp/tops && $(MAKE) -f src/CMakeFiles/ToPS.dir/build.make src/CMakeFiles/ToPS.dir/DiscreteIIDModelCreator.cpp.s
.PHONY : DiscreteIIDModelCreator.cpp.s

FactorableModel.o: FactorableModel.cpp.o
.PHONY : FactorableModel.o

# target to build an object file
FactorableModel.cpp.o:
	cd /Users/yoshiaki/tmp/tops && $(MAKE) -f src/CMakeFiles/ToPS.dir/build.make src/CMakeFiles/ToPS.dir/FactorableModel.cpp.o
.PHONY : FactorableModel.cpp.o

FactorableModel.i: FactorableModel.cpp.i
.PHONY : FactorableModel.i

# target to preprocess a source file
FactorableModel.cpp.i:
	cd /Users/yoshiaki/tmp/tops && $(MAKE) -f src/CMakeFiles/ToPS.dir/build.make src/CMakeFiles/ToPS.dir/FactorableModel.cpp.i
.PHONY : FactorableModel.cpp.i

FactorableModel.s: FactorableModel.cpp.s
.PHONY : FactorableModel.s

# target to generate assembly for a file
FactorableModel.cpp.s:
	cd /Users/yoshiaki/tmp/tops && $(MAKE) -f src/CMakeFiles/ToPS.dir/build.make src/CMakeFiles/ToPS.dir/FactorableModel.cpp.s
.PHONY : FactorableModel.cpp.s

FixedSequenceAtPosition.o: FixedSequenceAtPosition.cpp.o
.PHONY : FixedSequenceAtPosition.o

# target to build an object file
FixedSequenceAtPosition.cpp.o:
	cd /Users/yoshiaki/tmp/tops && $(MAKE) -f src/CMakeFiles/ToPS.dir/build.make src/CMakeFiles/ToPS.dir/FixedSequenceAtPosition.cpp.o
.PHONY : FixedSequenceAtPosition.cpp.o

FixedSequenceAtPosition.i: FixedSequenceAtPosition.cpp.i
.PHONY : FixedSequenceAtPosition.i

# target to preprocess a source file
FixedSequenceAtPosition.cpp.i:
	cd /Users/yoshiaki/tmp/tops && $(MAKE) -f src/CMakeFiles/ToPS.dir/build.make src/CMakeFiles/ToPS.dir/FixedSequenceAtPosition.cpp.i
.PHONY : FixedSequenceAtPosition.cpp.i

FixedSequenceAtPosition.s: FixedSequenceAtPosition.cpp.s
.PHONY : FixedSequenceAtPosition.s

# target to generate assembly for a file
FixedSequenceAtPosition.cpp.s:
	cd /Users/yoshiaki/tmp/tops && $(MAKE) -f src/CMakeFiles/ToPS.dir/build.make src/CMakeFiles/ToPS.dir/FixedSequenceAtPosition.cpp.s
.PHONY : FixedSequenceAtPosition.cpp.s

FixedSequenceAtPositionCreator.o: FixedSequenceAtPositionCreator.cpp.o
.PHONY : FixedSequenceAtPositionCreator.o

# target to build an object file
FixedSequenceAtPositionCreator.cpp.o:
	cd /Users/yoshiaki/tmp/tops && $(MAKE) -f src/CMakeFiles/ToPS.dir/build.make src/CMakeFiles/ToPS.dir/FixedSequenceAtPositionCreator.cpp.o
.PHONY : FixedSequenceAtPositionCreator.cpp.o

FixedSequenceAtPositionCreator.i: FixedSequenceAtPositionCreator.cpp.i
.PHONY : FixedSequenceAtPositionCreator.i

# target to preprocess a source file
FixedSequenceAtPositionCreator.cpp.i:
	cd /Users/yoshiaki/tmp/tops && $(MAKE) -f src/CMakeFiles/ToPS.dir/build.make src/CMakeFiles/ToPS.dir/FixedSequenceAtPositionCreator.cpp.i
.PHONY : FixedSequenceAtPositionCreator.cpp.i

FixedSequenceAtPositionCreator.s: FixedSequenceAtPositionCreator.cpp.s
.PHONY : FixedSequenceAtPositionCreator.s

# target to generate assembly for a file
FixedSequenceAtPositionCreator.cpp.s:
	cd /Users/yoshiaki/tmp/tops && $(MAKE) -f src/CMakeFiles/ToPS.dir/build.make src/CMakeFiles/ToPS.dir/FixedSequenceAtPositionCreator.cpp.s
.PHONY : FixedSequenceAtPositionCreator.cpp.s

GHMMStates.o: GHMMStates.cpp.o
.PHONY : GHMMStates.o

# target to build an object file
GHMMStates.cpp.o:
	cd /Users/yoshiaki/tmp/tops && $(MAKE) -f src/CMakeFiles/ToPS.dir/build.make src/CMakeFiles/ToPS.dir/GHMMStates.cpp.o
.PHONY : GHMMStates.cpp.o

GHMMStates.i: GHMMStates.cpp.i
.PHONY : GHMMStates.i

# target to preprocess a source file
GHMMStates.cpp.i:
	cd /Users/yoshiaki/tmp/tops && $(MAKE) -f src/CMakeFiles/ToPS.dir/build.make src/CMakeFiles/ToPS.dir/GHMMStates.cpp.i
.PHONY : GHMMStates.cpp.i

GHMMStates.s: GHMMStates.cpp.s
.PHONY : GHMMStates.s

# target to generate assembly for a file
GHMMStates.cpp.s:
	cd /Users/yoshiaki/tmp/tops && $(MAKE) -f src/CMakeFiles/ToPS.dir/build.make src/CMakeFiles/ToPS.dir/GHMMStates.cpp.s
.PHONY : GHMMStates.cpp.s

GeneralizedHiddenMarkovModel.o: GeneralizedHiddenMarkovModel.cpp.o
.PHONY : GeneralizedHiddenMarkovModel.o

# target to build an object file
GeneralizedHiddenMarkovModel.cpp.o:
	cd /Users/yoshiaki/tmp/tops && $(MAKE) -f src/CMakeFiles/ToPS.dir/build.make src/CMakeFiles/ToPS.dir/GeneralizedHiddenMarkovModel.cpp.o
.PHONY : GeneralizedHiddenMarkovModel.cpp.o

GeneralizedHiddenMarkovModel.i: GeneralizedHiddenMarkovModel.cpp.i
.PHONY : GeneralizedHiddenMarkovModel.i

# target to preprocess a source file
GeneralizedHiddenMarkovModel.cpp.i:
	cd /Users/yoshiaki/tmp/tops && $(MAKE) -f src/CMakeFiles/ToPS.dir/build.make src/CMakeFiles/ToPS.dir/GeneralizedHiddenMarkovModel.cpp.i
.PHONY : GeneralizedHiddenMarkovModel.cpp.i

GeneralizedHiddenMarkovModel.s: GeneralizedHiddenMarkovModel.cpp.s
.PHONY : GeneralizedHiddenMarkovModel.s

# target to generate assembly for a file
GeneralizedHiddenMarkovModel.cpp.s:
	cd /Users/yoshiaki/tmp/tops && $(MAKE) -f src/CMakeFiles/ToPS.dir/build.make src/CMakeFiles/ToPS.dir/GeneralizedHiddenMarkovModel.cpp.s
.PHONY : GeneralizedHiddenMarkovModel.cpp.s

GeneralizedHiddenMarkovModelCreator.o: GeneralizedHiddenMarkovModelCreator.cpp.o
.PHONY : GeneralizedHiddenMarkovModelCreator.o

# target to build an object file
GeneralizedHiddenMarkovModelCreator.cpp.o:
	cd /Users/yoshiaki/tmp/tops && $(MAKE) -f src/CMakeFiles/ToPS.dir/build.make src/CMakeFiles/ToPS.dir/GeneralizedHiddenMarkovModelCreator.cpp.o
.PHONY : GeneralizedHiddenMarkovModelCreator.cpp.o

GeneralizedHiddenMarkovModelCreator.i: GeneralizedHiddenMarkovModelCreator.cpp.i
.PHONY : GeneralizedHiddenMarkovModelCreator.i

# target to preprocess a source file
GeneralizedHiddenMarkovModelCreator.cpp.i:
	cd /Users/yoshiaki/tmp/tops && $(MAKE) -f src/CMakeFiles/ToPS.dir/build.make src/CMakeFiles/ToPS.dir/GeneralizedHiddenMarkovModelCreator.cpp.i
.PHONY : GeneralizedHiddenMarkovModelCreator.cpp.i

GeneralizedHiddenMarkovModelCreator.s: GeneralizedHiddenMarkovModelCreator.cpp.s
.PHONY : GeneralizedHiddenMarkovModelCreator.s

# target to generate assembly for a file
GeneralizedHiddenMarkovModelCreator.cpp.s:
	cd /Users/yoshiaki/tmp/tops && $(MAKE) -f src/CMakeFiles/ToPS.dir/build.make src/CMakeFiles/ToPS.dir/GeneralizedHiddenMarkovModelCreator.cpp.s
.PHONY : GeneralizedHiddenMarkovModelCreator.cpp.s

HiddenMarkovModel.o: HiddenMarkovModel.cpp.o
.PHONY : HiddenMarkovModel.o

# target to build an object file
HiddenMarkovModel.cpp.o:
	cd /Users/yoshiaki/tmp/tops && $(MAKE) -f src/CMakeFiles/ToPS.dir/build.make src/CMakeFiles/ToPS.dir/HiddenMarkovModel.cpp.o
.PHONY : HiddenMarkovModel.cpp.o

HiddenMarkovModel.i: HiddenMarkovModel.cpp.i
.PHONY : HiddenMarkovModel.i

# target to preprocess a source file
HiddenMarkovModel.cpp.i:
	cd /Users/yoshiaki/tmp/tops && $(MAKE) -f src/CMakeFiles/ToPS.dir/build.make src/CMakeFiles/ToPS.dir/HiddenMarkovModel.cpp.i
.PHONY : HiddenMarkovModel.cpp.i

HiddenMarkovModel.s: HiddenMarkovModel.cpp.s
.PHONY : HiddenMarkovModel.s

# target to generate assembly for a file
HiddenMarkovModel.cpp.s:
	cd /Users/yoshiaki/tmp/tops && $(MAKE) -f src/CMakeFiles/ToPS.dir/build.make src/CMakeFiles/ToPS.dir/HiddenMarkovModel.cpp.s
.PHONY : HiddenMarkovModel.cpp.s

HiddenMarkovModelCreator.o: HiddenMarkovModelCreator.cpp.o
.PHONY : HiddenMarkovModelCreator.o

# target to build an object file
HiddenMarkovModelCreator.cpp.o:
	cd /Users/yoshiaki/tmp/tops && $(MAKE) -f src/CMakeFiles/ToPS.dir/build.make src/CMakeFiles/ToPS.dir/HiddenMarkovModelCreator.cpp.o
.PHONY : HiddenMarkovModelCreator.cpp.o

HiddenMarkovModelCreator.i: HiddenMarkovModelCreator.cpp.i
.PHONY : HiddenMarkovModelCreator.i

# target to preprocess a source file
HiddenMarkovModelCreator.cpp.i:
	cd /Users/yoshiaki/tmp/tops && $(MAKE) -f src/CMakeFiles/ToPS.dir/build.make src/CMakeFiles/ToPS.dir/HiddenMarkovModelCreator.cpp.i
.PHONY : HiddenMarkovModelCreator.cpp.i

HiddenMarkovModelCreator.s: HiddenMarkovModelCreator.cpp.s
.PHONY : HiddenMarkovModelCreator.s

# target to generate assembly for a file
HiddenMarkovModelCreator.cpp.s:
	cd /Users/yoshiaki/tmp/tops && $(MAKE) -f src/CMakeFiles/ToPS.dir/build.make src/CMakeFiles/ToPS.dir/HiddenMarkovModelCreator.cpp.s
.PHONY : HiddenMarkovModelCreator.cpp.s

InhomogeneousFactorableModel.o: InhomogeneousFactorableModel.cpp.o
.PHONY : InhomogeneousFactorableModel.o

# target to build an object file
InhomogeneousFactorableModel.cpp.o:
	cd /Users/yoshiaki/tmp/tops && $(MAKE) -f src/CMakeFiles/ToPS.dir/build.make src/CMakeFiles/ToPS.dir/InhomogeneousFactorableModel.cpp.o
.PHONY : InhomogeneousFactorableModel.cpp.o

InhomogeneousFactorableModel.i: InhomogeneousFactorableModel.cpp.i
.PHONY : InhomogeneousFactorableModel.i

# target to preprocess a source file
InhomogeneousFactorableModel.cpp.i:
	cd /Users/yoshiaki/tmp/tops && $(MAKE) -f src/CMakeFiles/ToPS.dir/build.make src/CMakeFiles/ToPS.dir/InhomogeneousFactorableModel.cpp.i
.PHONY : InhomogeneousFactorableModel.cpp.i

InhomogeneousFactorableModel.s: InhomogeneousFactorableModel.cpp.s
.PHONY : InhomogeneousFactorableModel.s

# target to generate assembly for a file
InhomogeneousFactorableModel.cpp.s:
	cd /Users/yoshiaki/tmp/tops && $(MAKE) -f src/CMakeFiles/ToPS.dir/build.make src/CMakeFiles/ToPS.dir/InhomogeneousFactorableModel.cpp.s
.PHONY : InhomogeneousFactorableModel.cpp.s

InhomogeneousMarkovChain.o: InhomogeneousMarkovChain.cpp.o
.PHONY : InhomogeneousMarkovChain.o

# target to build an object file
InhomogeneousMarkovChain.cpp.o:
	cd /Users/yoshiaki/tmp/tops && $(MAKE) -f src/CMakeFiles/ToPS.dir/build.make src/CMakeFiles/ToPS.dir/InhomogeneousMarkovChain.cpp.o
.PHONY : InhomogeneousMarkovChain.cpp.o

InhomogeneousMarkovChain.i: InhomogeneousMarkovChain.cpp.i
.PHONY : InhomogeneousMarkovChain.i

# target to preprocess a source file
InhomogeneousMarkovChain.cpp.i:
	cd /Users/yoshiaki/tmp/tops && $(MAKE) -f src/CMakeFiles/ToPS.dir/build.make src/CMakeFiles/ToPS.dir/InhomogeneousMarkovChain.cpp.i
.PHONY : InhomogeneousMarkovChain.cpp.i

InhomogeneousMarkovChain.s: InhomogeneousMarkovChain.cpp.s
.PHONY : InhomogeneousMarkovChain.s

# target to generate assembly for a file
InhomogeneousMarkovChain.cpp.s:
	cd /Users/yoshiaki/tmp/tops && $(MAKE) -f src/CMakeFiles/ToPS.dir/build.make src/CMakeFiles/ToPS.dir/InhomogeneousMarkovChain.cpp.s
.PHONY : InhomogeneousMarkovChain.cpp.s

InhomogeneousMarkovChainCreator.o: InhomogeneousMarkovChainCreator.cpp.o
.PHONY : InhomogeneousMarkovChainCreator.o

# target to build an object file
InhomogeneousMarkovChainCreator.cpp.o:
	cd /Users/yoshiaki/tmp/tops && $(MAKE) -f src/CMakeFiles/ToPS.dir/build.make src/CMakeFiles/ToPS.dir/InhomogeneousMarkovChainCreator.cpp.o
.PHONY : InhomogeneousMarkovChainCreator.cpp.o

InhomogeneousMarkovChainCreator.i: InhomogeneousMarkovChainCreator.cpp.i
.PHONY : InhomogeneousMarkovChainCreator.i

# target to preprocess a source file
InhomogeneousMarkovChainCreator.cpp.i:
	cd /Users/yoshiaki/tmp/tops && $(MAKE) -f src/CMakeFiles/ToPS.dir/build.make src/CMakeFiles/ToPS.dir/InhomogeneousMarkovChainCreator.cpp.i
.PHONY : InhomogeneousMarkovChainCreator.cpp.i

InhomogeneousMarkovChainCreator.s: InhomogeneousMarkovChainCreator.cpp.s
.PHONY : InhomogeneousMarkovChainCreator.s

# target to generate assembly for a file
InhomogeneousMarkovChainCreator.cpp.s:
	cd /Users/yoshiaki/tmp/tops && $(MAKE) -f src/CMakeFiles/ToPS.dir/build.make src/CMakeFiles/ToPS.dir/InhomogeneousMarkovChainCreator.cpp.s
.PHONY : InhomogeneousMarkovChainCreator.cpp.s

MaximumDependenceDecomposition.o: MaximumDependenceDecomposition.cpp.o
.PHONY : MaximumDependenceDecomposition.o

# target to build an object file
MaximumDependenceDecomposition.cpp.o:
	cd /Users/yoshiaki/tmp/tops && $(MAKE) -f src/CMakeFiles/ToPS.dir/build.make src/CMakeFiles/ToPS.dir/MaximumDependenceDecomposition.cpp.o
.PHONY : MaximumDependenceDecomposition.cpp.o

MaximumDependenceDecomposition.i: MaximumDependenceDecomposition.cpp.i
.PHONY : MaximumDependenceDecomposition.i

# target to preprocess a source file
MaximumDependenceDecomposition.cpp.i:
	cd /Users/yoshiaki/tmp/tops && $(MAKE) -f src/CMakeFiles/ToPS.dir/build.make src/CMakeFiles/ToPS.dir/MaximumDependenceDecomposition.cpp.i
.PHONY : MaximumDependenceDecomposition.cpp.i

MaximumDependenceDecomposition.s: MaximumDependenceDecomposition.cpp.s
.PHONY : MaximumDependenceDecomposition.s

# target to generate assembly for a file
MaximumDependenceDecomposition.cpp.s:
	cd /Users/yoshiaki/tmp/tops && $(MAKE) -f src/CMakeFiles/ToPS.dir/build.make src/CMakeFiles/ToPS.dir/MaximumDependenceDecomposition.cpp.s
.PHONY : MaximumDependenceDecomposition.cpp.s

MultipleAlignment.o: MultipleAlignment.cpp.o
.PHONY : MultipleAlignment.o

# target to build an object file
MultipleAlignment.cpp.o:
	cd /Users/yoshiaki/tmp/tops && $(MAKE) -f src/CMakeFiles/ToPS.dir/build.make src/CMakeFiles/ToPS.dir/MultipleAlignment.cpp.o
.PHONY : MultipleAlignment.cpp.o

MultipleAlignment.i: MultipleAlignment.cpp.i
.PHONY : MultipleAlignment.i

# target to preprocess a source file
MultipleAlignment.cpp.i:
	cd /Users/yoshiaki/tmp/tops && $(MAKE) -f src/CMakeFiles/ToPS.dir/build.make src/CMakeFiles/ToPS.dir/MultipleAlignment.cpp.i
.PHONY : MultipleAlignment.cpp.i

MultipleAlignment.s: MultipleAlignment.cpp.s
.PHONY : MultipleAlignment.s

# target to generate assembly for a file
MultipleAlignment.cpp.s:
	cd /Users/yoshiaki/tmp/tops && $(MAKE) -f src/CMakeFiles/ToPS.dir/build.make src/CMakeFiles/ToPS.dir/MultipleAlignment.cpp.s
.PHONY : MultipleAlignment.cpp.s

MultipleSequentialModel.o: MultipleSequentialModel.cpp.o
.PHONY : MultipleSequentialModel.o

# target to build an object file
MultipleSequentialModel.cpp.o:
	cd /Users/yoshiaki/tmp/tops && $(MAKE) -f src/CMakeFiles/ToPS.dir/build.make src/CMakeFiles/ToPS.dir/MultipleSequentialModel.cpp.o
.PHONY : MultipleSequentialModel.cpp.o

MultipleSequentialModel.i: MultipleSequentialModel.cpp.i
.PHONY : MultipleSequentialModel.i

# target to preprocess a source file
MultipleSequentialModel.cpp.i:
	cd /Users/yoshiaki/tmp/tops && $(MAKE) -f src/CMakeFiles/ToPS.dir/build.make src/CMakeFiles/ToPS.dir/MultipleSequentialModel.cpp.i
.PHONY : MultipleSequentialModel.cpp.i

MultipleSequentialModel.s: MultipleSequentialModel.cpp.s
.PHONY : MultipleSequentialModel.s

# target to generate assembly for a file
MultipleSequentialModel.cpp.s:
	cd /Users/yoshiaki/tmp/tops && $(MAKE) -f src/CMakeFiles/ToPS.dir/build.make src/CMakeFiles/ToPS.dir/MultipleSequentialModel.cpp.s
.PHONY : MultipleSequentialModel.cpp.s

MultipleSequentialModelCreator.o: MultipleSequentialModelCreator.cpp.o
.PHONY : MultipleSequentialModelCreator.o

# target to build an object file
MultipleSequentialModelCreator.cpp.o:
	cd /Users/yoshiaki/tmp/tops && $(MAKE) -f src/CMakeFiles/ToPS.dir/build.make src/CMakeFiles/ToPS.dir/MultipleSequentialModelCreator.cpp.o
.PHONY : MultipleSequentialModelCreator.cpp.o

MultipleSequentialModelCreator.i: MultipleSequentialModelCreator.cpp.i
.PHONY : MultipleSequentialModelCreator.i

# target to preprocess a source file
MultipleSequentialModelCreator.cpp.i:
	cd /Users/yoshiaki/tmp/tops && $(MAKE) -f src/CMakeFiles/ToPS.dir/build.make src/CMakeFiles/ToPS.dir/MultipleSequentialModelCreator.cpp.i
.PHONY : MultipleSequentialModelCreator.cpp.i

MultipleSequentialModelCreator.s: MultipleSequentialModelCreator.cpp.s
.PHONY : MultipleSequentialModelCreator.s

# target to generate assembly for a file
MultipleSequentialModelCreator.cpp.s:
	cd /Users/yoshiaki/tmp/tops && $(MAKE) -f src/CMakeFiles/ToPS.dir/build.make src/CMakeFiles/ToPS.dir/MultipleSequentialModelCreator.cpp.s
.PHONY : MultipleSequentialModelCreator.cpp.s

PairHiddenMarkovModel.o: PairHiddenMarkovModel.cpp.o
.PHONY : PairHiddenMarkovModel.o

# target to build an object file
PairHiddenMarkovModel.cpp.o:
	cd /Users/yoshiaki/tmp/tops && $(MAKE) -f src/CMakeFiles/ToPS.dir/build.make src/CMakeFiles/ToPS.dir/PairHiddenMarkovModel.cpp.o
.PHONY : PairHiddenMarkovModel.cpp.o

PairHiddenMarkovModel.i: PairHiddenMarkovModel.cpp.i
.PHONY : PairHiddenMarkovModel.i

# target to preprocess a source file
PairHiddenMarkovModel.cpp.i:
	cd /Users/yoshiaki/tmp/tops && $(MAKE) -f src/CMakeFiles/ToPS.dir/build.make src/CMakeFiles/ToPS.dir/PairHiddenMarkovModel.cpp.i
.PHONY : PairHiddenMarkovModel.cpp.i

PairHiddenMarkovModel.s: PairHiddenMarkovModel.cpp.s
.PHONY : PairHiddenMarkovModel.s

# target to generate assembly for a file
PairHiddenMarkovModel.cpp.s:
	cd /Users/yoshiaki/tmp/tops && $(MAKE) -f src/CMakeFiles/ToPS.dir/build.make src/CMakeFiles/ToPS.dir/PairHiddenMarkovModel.cpp.s
.PHONY : PairHiddenMarkovModel.cpp.s

PairHiddenMarkovModelCreator.o: PairHiddenMarkovModelCreator.cpp.o
.PHONY : PairHiddenMarkovModelCreator.o

# target to build an object file
PairHiddenMarkovModelCreator.cpp.o:
	cd /Users/yoshiaki/tmp/tops && $(MAKE) -f src/CMakeFiles/ToPS.dir/build.make src/CMakeFiles/ToPS.dir/PairHiddenMarkovModelCreator.cpp.o
.PHONY : PairHiddenMarkovModelCreator.cpp.o

PairHiddenMarkovModelCreator.i: PairHiddenMarkovModelCreator.cpp.i
.PHONY : PairHiddenMarkovModelCreator.i

# target to preprocess a source file
PairHiddenMarkovModelCreator.cpp.i:
	cd /Users/yoshiaki/tmp/tops && $(MAKE) -f src/CMakeFiles/ToPS.dir/build.make src/CMakeFiles/ToPS.dir/PairHiddenMarkovModelCreator.cpp.i
.PHONY : PairHiddenMarkovModelCreator.cpp.i

PairHiddenMarkovModelCreator.s: PairHiddenMarkovModelCreator.cpp.s
.PHONY : PairHiddenMarkovModelCreator.s

# target to generate assembly for a file
PairHiddenMarkovModelCreator.cpp.s:
	cd /Users/yoshiaki/tmp/tops && $(MAKE) -f src/CMakeFiles/ToPS.dir/build.make src/CMakeFiles/ToPS.dir/PairHiddenMarkovModelCreator.cpp.s
.PHONY : PairHiddenMarkovModelCreator.cpp.s

PhasedRunLengthDistribution.o: PhasedRunLengthDistribution.cpp.o
.PHONY : PhasedRunLengthDistribution.o

# target to build an object file
PhasedRunLengthDistribution.cpp.o:
	cd /Users/yoshiaki/tmp/tops && $(MAKE) -f src/CMakeFiles/ToPS.dir/build.make src/CMakeFiles/ToPS.dir/PhasedRunLengthDistribution.cpp.o
.PHONY : PhasedRunLengthDistribution.cpp.o

PhasedRunLengthDistribution.i: PhasedRunLengthDistribution.cpp.i
.PHONY : PhasedRunLengthDistribution.i

# target to preprocess a source file
PhasedRunLengthDistribution.cpp.i:
	cd /Users/yoshiaki/tmp/tops && $(MAKE) -f src/CMakeFiles/ToPS.dir/build.make src/CMakeFiles/ToPS.dir/PhasedRunLengthDistribution.cpp.i
.PHONY : PhasedRunLengthDistribution.cpp.i

PhasedRunLengthDistribution.s: PhasedRunLengthDistribution.cpp.s
.PHONY : PhasedRunLengthDistribution.s

# target to generate assembly for a file
PhasedRunLengthDistribution.cpp.s:
	cd /Users/yoshiaki/tmp/tops && $(MAKE) -f src/CMakeFiles/ToPS.dir/build.make src/CMakeFiles/ToPS.dir/PhasedRunLengthDistribution.cpp.s
.PHONY : PhasedRunLengthDistribution.cpp.s

PhasedRunLengthDistributionCreator.o: PhasedRunLengthDistributionCreator.cpp.o
.PHONY : PhasedRunLengthDistributionCreator.o

# target to build an object file
PhasedRunLengthDistributionCreator.cpp.o:
	cd /Users/yoshiaki/tmp/tops && $(MAKE) -f src/CMakeFiles/ToPS.dir/build.make src/CMakeFiles/ToPS.dir/PhasedRunLengthDistributionCreator.cpp.o
.PHONY : PhasedRunLengthDistributionCreator.cpp.o

PhasedRunLengthDistributionCreator.i: PhasedRunLengthDistributionCreator.cpp.i
.PHONY : PhasedRunLengthDistributionCreator.i

# target to preprocess a source file
PhasedRunLengthDistributionCreator.cpp.i:
	cd /Users/yoshiaki/tmp/tops && $(MAKE) -f src/CMakeFiles/ToPS.dir/build.make src/CMakeFiles/ToPS.dir/PhasedRunLengthDistributionCreator.cpp.i
.PHONY : PhasedRunLengthDistributionCreator.cpp.i

PhasedRunLengthDistributionCreator.s: PhasedRunLengthDistributionCreator.cpp.s
.PHONY : PhasedRunLengthDistributionCreator.s

# target to generate assembly for a file
PhasedRunLengthDistributionCreator.cpp.s:
	cd /Users/yoshiaki/tmp/tops && $(MAKE) -f src/CMakeFiles/ToPS.dir/build.make src/CMakeFiles/ToPS.dir/PhasedRunLengthDistributionCreator.cpp.s
.PHONY : PhasedRunLengthDistributionCreator.cpp.s

ProbabilisticModelConfiguration.o: ProbabilisticModelConfiguration.cpp.o
.PHONY : ProbabilisticModelConfiguration.o

# target to build an object file
ProbabilisticModelConfiguration.cpp.o:
	cd /Users/yoshiaki/tmp/tops && $(MAKE) -f src/CMakeFiles/ToPS.dir/build.make src/CMakeFiles/ToPS.dir/ProbabilisticModelConfiguration.cpp.o
.PHONY : ProbabilisticModelConfiguration.cpp.o

ProbabilisticModelConfiguration.i: ProbabilisticModelConfiguration.cpp.i
.PHONY : ProbabilisticModelConfiguration.i

# target to preprocess a source file
ProbabilisticModelConfiguration.cpp.i:
	cd /Users/yoshiaki/tmp/tops && $(MAKE) -f src/CMakeFiles/ToPS.dir/build.make src/CMakeFiles/ToPS.dir/ProbabilisticModelConfiguration.cpp.i
.PHONY : ProbabilisticModelConfiguration.cpp.i

ProbabilisticModelConfiguration.s: ProbabilisticModelConfiguration.cpp.s
.PHONY : ProbabilisticModelConfiguration.s

# target to generate assembly for a file
ProbabilisticModelConfiguration.cpp.s:
	cd /Users/yoshiaki/tmp/tops && $(MAKE) -f src/CMakeFiles/ToPS.dir/build.make src/CMakeFiles/ToPS.dir/ProbabilisticModelConfiguration.cpp.s
.PHONY : ProbabilisticModelConfiguration.cpp.s

ProbabilisticModelCreatorClient.o: ProbabilisticModelCreatorClient.cpp.o
.PHONY : ProbabilisticModelCreatorClient.o

# target to build an object file
ProbabilisticModelCreatorClient.cpp.o:
	cd /Users/yoshiaki/tmp/tops && $(MAKE) -f src/CMakeFiles/ToPS.dir/build.make src/CMakeFiles/ToPS.dir/ProbabilisticModelCreatorClient.cpp.o
.PHONY : ProbabilisticModelCreatorClient.cpp.o

ProbabilisticModelCreatorClient.i: ProbabilisticModelCreatorClient.cpp.i
.PHONY : ProbabilisticModelCreatorClient.i

# target to preprocess a source file
ProbabilisticModelCreatorClient.cpp.i:
	cd /Users/yoshiaki/tmp/tops && $(MAKE) -f src/CMakeFiles/ToPS.dir/build.make src/CMakeFiles/ToPS.dir/ProbabilisticModelCreatorClient.cpp.i
.PHONY : ProbabilisticModelCreatorClient.cpp.i

ProbabilisticModelCreatorClient.s: ProbabilisticModelCreatorClient.cpp.s
.PHONY : ProbabilisticModelCreatorClient.s

# target to generate assembly for a file
ProbabilisticModelCreatorClient.cpp.s:
	cd /Users/yoshiaki/tmp/tops && $(MAKE) -f src/CMakeFiles/ToPS.dir/build.make src/CMakeFiles/ToPS.dir/ProbabilisticModelCreatorClient.cpp.s
.PHONY : ProbabilisticModelCreatorClient.cpp.s

ProbabilisticModelParameter.o: ProbabilisticModelParameter.cpp.o
.PHONY : ProbabilisticModelParameter.o

# target to build an object file
ProbabilisticModelParameter.cpp.o:
	cd /Users/yoshiaki/tmp/tops && $(MAKE) -f src/CMakeFiles/ToPS.dir/build.make src/CMakeFiles/ToPS.dir/ProbabilisticModelParameter.cpp.o
.PHONY : ProbabilisticModelParameter.cpp.o

ProbabilisticModelParameter.i: ProbabilisticModelParameter.cpp.i
.PHONY : ProbabilisticModelParameter.i

# target to preprocess a source file
ProbabilisticModelParameter.cpp.i:
	cd /Users/yoshiaki/tmp/tops && $(MAKE) -f src/CMakeFiles/ToPS.dir/build.make src/CMakeFiles/ToPS.dir/ProbabilisticModelParameter.cpp.i
.PHONY : ProbabilisticModelParameter.cpp.i

ProbabilisticModelParameter.s: ProbabilisticModelParameter.cpp.s
.PHONY : ProbabilisticModelParameter.s

# target to generate assembly for a file
ProbabilisticModelParameter.cpp.s:
	cd /Users/yoshiaki/tmp/tops && $(MAKE) -f src/CMakeFiles/ToPS.dir/build.make src/CMakeFiles/ToPS.dir/ProbabilisticModelParameter.cpp.s
.PHONY : ProbabilisticModelParameter.cpp.s

ProbabilisticModelParameterValue2.o: ProbabilisticModelParameterValue2.cpp.o
.PHONY : ProbabilisticModelParameterValue2.o

# target to build an object file
ProbabilisticModelParameterValue2.cpp.o:
	cd /Users/yoshiaki/tmp/tops && $(MAKE) -f src/CMakeFiles/ToPS.dir/build.make src/CMakeFiles/ToPS.dir/ProbabilisticModelParameterValue2.cpp.o
.PHONY : ProbabilisticModelParameterValue2.cpp.o

ProbabilisticModelParameterValue2.i: ProbabilisticModelParameterValue2.cpp.i
.PHONY : ProbabilisticModelParameterValue2.i

# target to preprocess a source file
ProbabilisticModelParameterValue2.cpp.i:
	cd /Users/yoshiaki/tmp/tops && $(MAKE) -f src/CMakeFiles/ToPS.dir/build.make src/CMakeFiles/ToPS.dir/ProbabilisticModelParameterValue2.cpp.i
.PHONY : ProbabilisticModelParameterValue2.cpp.i

ProbabilisticModelParameterValue2.s: ProbabilisticModelParameterValue2.cpp.s
.PHONY : ProbabilisticModelParameterValue2.s

# target to generate assembly for a file
ProbabilisticModelParameterValue2.cpp.s:
	cd /Users/yoshiaki/tmp/tops && $(MAKE) -f src/CMakeFiles/ToPS.dir/build.make src/CMakeFiles/ToPS.dir/ProbabilisticModelParameterValue2.cpp.s
.PHONY : ProbabilisticModelParameterValue2.cpp.s

ProfileHiddenMarkovModel.o: ProfileHiddenMarkovModel.cpp.o
.PHONY : ProfileHiddenMarkovModel.o

# target to build an object file
ProfileHiddenMarkovModel.cpp.o:
	cd /Users/yoshiaki/tmp/tops && $(MAKE) -f src/CMakeFiles/ToPS.dir/build.make src/CMakeFiles/ToPS.dir/ProfileHiddenMarkovModel.cpp.o
.PHONY : ProfileHiddenMarkovModel.cpp.o

ProfileHiddenMarkovModel.i: ProfileHiddenMarkovModel.cpp.i
.PHONY : ProfileHiddenMarkovModel.i

# target to preprocess a source file
ProfileHiddenMarkovModel.cpp.i:
	cd /Users/yoshiaki/tmp/tops && $(MAKE) -f src/CMakeFiles/ToPS.dir/build.make src/CMakeFiles/ToPS.dir/ProfileHiddenMarkovModel.cpp.i
.PHONY : ProfileHiddenMarkovModel.cpp.i

ProfileHiddenMarkovModel.s: ProfileHiddenMarkovModel.cpp.s
.PHONY : ProfileHiddenMarkovModel.s

# target to generate assembly for a file
ProfileHiddenMarkovModel.cpp.s:
	cd /Users/yoshiaki/tmp/tops && $(MAKE) -f src/CMakeFiles/ToPS.dir/build.make src/CMakeFiles/ToPS.dir/ProfileHiddenMarkovModel.cpp.s
.PHONY : ProfileHiddenMarkovModel.cpp.s

ProfileHiddenMarkovModelCreator.o: ProfileHiddenMarkovModelCreator.cpp.o
.PHONY : ProfileHiddenMarkovModelCreator.o

# target to build an object file
ProfileHiddenMarkovModelCreator.cpp.o:
	cd /Users/yoshiaki/tmp/tops && $(MAKE) -f src/CMakeFiles/ToPS.dir/build.make src/CMakeFiles/ToPS.dir/ProfileHiddenMarkovModelCreator.cpp.o
.PHONY : ProfileHiddenMarkovModelCreator.cpp.o

ProfileHiddenMarkovModelCreator.i: ProfileHiddenMarkovModelCreator.cpp.i
.PHONY : ProfileHiddenMarkovModelCreator.i

# target to preprocess a source file
ProfileHiddenMarkovModelCreator.cpp.i:
	cd /Users/yoshiaki/tmp/tops && $(MAKE) -f src/CMakeFiles/ToPS.dir/build.make src/CMakeFiles/ToPS.dir/ProfileHiddenMarkovModelCreator.cpp.i
.PHONY : ProfileHiddenMarkovModelCreator.cpp.i

ProfileHiddenMarkovModelCreator.s: ProfileHiddenMarkovModelCreator.cpp.s
.PHONY : ProfileHiddenMarkovModelCreator.s

# target to generate assembly for a file
ProfileHiddenMarkovModelCreator.cpp.s:
	cd /Users/yoshiaki/tmp/tops && $(MAKE) -f src/CMakeFiles/ToPS.dir/build.make src/CMakeFiles/ToPS.dir/ProfileHiddenMarkovModelCreator.cpp.s
.PHONY : ProfileHiddenMarkovModelCreator.cpp.s

RemoveSequenceFromModel.o: RemoveSequenceFromModel.cpp.o
.PHONY : RemoveSequenceFromModel.o

# target to build an object file
RemoveSequenceFromModel.cpp.o:
	cd /Users/yoshiaki/tmp/tops && $(MAKE) -f src/CMakeFiles/ToPS.dir/build.make src/CMakeFiles/ToPS.dir/RemoveSequenceFromModel.cpp.o
.PHONY : RemoveSequenceFromModel.cpp.o

RemoveSequenceFromModel.i: RemoveSequenceFromModel.cpp.i
.PHONY : RemoveSequenceFromModel.i

# target to preprocess a source file
RemoveSequenceFromModel.cpp.i:
	cd /Users/yoshiaki/tmp/tops && $(MAKE) -f src/CMakeFiles/ToPS.dir/build.make src/CMakeFiles/ToPS.dir/RemoveSequenceFromModel.cpp.i
.PHONY : RemoveSequenceFromModel.cpp.i

RemoveSequenceFromModel.s: RemoveSequenceFromModel.cpp.s
.PHONY : RemoveSequenceFromModel.s

# target to generate assembly for a file
RemoveSequenceFromModel.cpp.s:
	cd /Users/yoshiaki/tmp/tops && $(MAKE) -f src/CMakeFiles/ToPS.dir/build.make src/CMakeFiles/ToPS.dir/RemoveSequenceFromModel.cpp.s
.PHONY : RemoveSequenceFromModel.cpp.s

ReverseComplementDNA.o: ReverseComplementDNA.cpp.o
.PHONY : ReverseComplementDNA.o

# target to build an object file
ReverseComplementDNA.cpp.o:
	cd /Users/yoshiaki/tmp/tops && $(MAKE) -f src/CMakeFiles/ToPS.dir/build.make src/CMakeFiles/ToPS.dir/ReverseComplementDNA.cpp.o
.PHONY : ReverseComplementDNA.cpp.o

ReverseComplementDNA.i: ReverseComplementDNA.cpp.i
.PHONY : ReverseComplementDNA.i

# target to preprocess a source file
ReverseComplementDNA.cpp.i:
	cd /Users/yoshiaki/tmp/tops && $(MAKE) -f src/CMakeFiles/ToPS.dir/build.make src/CMakeFiles/ToPS.dir/ReverseComplementDNA.cpp.i
.PHONY : ReverseComplementDNA.cpp.i

ReverseComplementDNA.s: ReverseComplementDNA.cpp.s
.PHONY : ReverseComplementDNA.s

# target to generate assembly for a file
ReverseComplementDNA.cpp.s:
	cd /Users/yoshiaki/tmp/tops && $(MAKE) -f src/CMakeFiles/ToPS.dir/build.make src/CMakeFiles/ToPS.dir/ReverseComplementDNA.cpp.s
.PHONY : ReverseComplementDNA.cpp.s

ReverseComplementDNACreator.o: ReverseComplementDNACreator.cpp.o
.PHONY : ReverseComplementDNACreator.o

# target to build an object file
ReverseComplementDNACreator.cpp.o:
	cd /Users/yoshiaki/tmp/tops && $(MAKE) -f src/CMakeFiles/ToPS.dir/build.make src/CMakeFiles/ToPS.dir/ReverseComplementDNACreator.cpp.o
.PHONY : ReverseComplementDNACreator.cpp.o

ReverseComplementDNACreator.i: ReverseComplementDNACreator.cpp.i
.PHONY : ReverseComplementDNACreator.i

# target to preprocess a source file
ReverseComplementDNACreator.cpp.i:
	cd /Users/yoshiaki/tmp/tops && $(MAKE) -f src/CMakeFiles/ToPS.dir/build.make src/CMakeFiles/ToPS.dir/ReverseComplementDNACreator.cpp.i
.PHONY : ReverseComplementDNACreator.cpp.i

ReverseComplementDNACreator.s: ReverseComplementDNACreator.cpp.s
.PHONY : ReverseComplementDNACreator.s

# target to generate assembly for a file
ReverseComplementDNACreator.cpp.s:
	cd /Users/yoshiaki/tmp/tops && $(MAKE) -f src/CMakeFiles/ToPS.dir/build.make src/CMakeFiles/ToPS.dir/ReverseComplementDNACreator.cpp.s
.PHONY : ReverseComplementDNACreator.cpp.s

SequenceEntry.o: SequenceEntry.cpp.o
.PHONY : SequenceEntry.o

# target to build an object file
SequenceEntry.cpp.o:
	cd /Users/yoshiaki/tmp/tops && $(MAKE) -f src/CMakeFiles/ToPS.dir/build.make src/CMakeFiles/ToPS.dir/SequenceEntry.cpp.o
.PHONY : SequenceEntry.cpp.o

SequenceEntry.i: SequenceEntry.cpp.i
.PHONY : SequenceEntry.i

# target to preprocess a source file
SequenceEntry.cpp.i:
	cd /Users/yoshiaki/tmp/tops && $(MAKE) -f src/CMakeFiles/ToPS.dir/build.make src/CMakeFiles/ToPS.dir/SequenceEntry.cpp.i
.PHONY : SequenceEntry.cpp.i

SequenceEntry.s: SequenceEntry.cpp.s
.PHONY : SequenceEntry.s

# target to generate assembly for a file
SequenceEntry.cpp.s:
	cd /Users/yoshiaki/tmp/tops && $(MAKE) -f src/CMakeFiles/ToPS.dir/build.make src/CMakeFiles/ToPS.dir/SequenceEntry.cpp.s
.PHONY : SequenceEntry.cpp.s

SequenceFactory.o: SequenceFactory.cpp.o
.PHONY : SequenceFactory.o

# target to build an object file
SequenceFactory.cpp.o:
	cd /Users/yoshiaki/tmp/tops && $(MAKE) -f src/CMakeFiles/ToPS.dir/build.make src/CMakeFiles/ToPS.dir/SequenceFactory.cpp.o
.PHONY : SequenceFactory.cpp.o

SequenceFactory.i: SequenceFactory.cpp.i
.PHONY : SequenceFactory.i

# target to preprocess a source file
SequenceFactory.cpp.i:
	cd /Users/yoshiaki/tmp/tops && $(MAKE) -f src/CMakeFiles/ToPS.dir/build.make src/CMakeFiles/ToPS.dir/SequenceFactory.cpp.i
.PHONY : SequenceFactory.cpp.i

SequenceFactory.s: SequenceFactory.cpp.s
.PHONY : SequenceFactory.s

# target to generate assembly for a file
SequenceFactory.cpp.s:
	cd /Users/yoshiaki/tmp/tops && $(MAKE) -f src/CMakeFiles/ToPS.dir/build.make src/CMakeFiles/ToPS.dir/SequenceFactory.cpp.s
.PHONY : SequenceFactory.cpp.s

SequenceFormat.o: SequenceFormat.cpp.o
.PHONY : SequenceFormat.o

# target to build an object file
SequenceFormat.cpp.o:
	cd /Users/yoshiaki/tmp/tops && $(MAKE) -f src/CMakeFiles/ToPS.dir/build.make src/CMakeFiles/ToPS.dir/SequenceFormat.cpp.o
.PHONY : SequenceFormat.cpp.o

SequenceFormat.i: SequenceFormat.cpp.i
.PHONY : SequenceFormat.i

# target to preprocess a source file
SequenceFormat.cpp.i:
	cd /Users/yoshiaki/tmp/tops && $(MAKE) -f src/CMakeFiles/ToPS.dir/build.make src/CMakeFiles/ToPS.dir/SequenceFormat.cpp.i
.PHONY : SequenceFormat.cpp.i

SequenceFormat.s: SequenceFormat.cpp.s
.PHONY : SequenceFormat.s

# target to generate assembly for a file
SequenceFormat.cpp.s:
	cd /Users/yoshiaki/tmp/tops && $(MAKE) -f src/CMakeFiles/ToPS.dir/build.make src/CMakeFiles/ToPS.dir/SequenceFormat.cpp.s
.PHONY : SequenceFormat.cpp.s

SimilarityBasedSequenceWeighting.o: SimilarityBasedSequenceWeighting.cpp.o
.PHONY : SimilarityBasedSequenceWeighting.o

# target to build an object file
SimilarityBasedSequenceWeighting.cpp.o:
	cd /Users/yoshiaki/tmp/tops && $(MAKE) -f src/CMakeFiles/ToPS.dir/build.make src/CMakeFiles/ToPS.dir/SimilarityBasedSequenceWeighting.cpp.o
.PHONY : SimilarityBasedSequenceWeighting.cpp.o

SimilarityBasedSequenceWeighting.i: SimilarityBasedSequenceWeighting.cpp.i
.PHONY : SimilarityBasedSequenceWeighting.i

# target to preprocess a source file
SimilarityBasedSequenceWeighting.cpp.i:
	cd /Users/yoshiaki/tmp/tops && $(MAKE) -f src/CMakeFiles/ToPS.dir/build.make src/CMakeFiles/ToPS.dir/SimilarityBasedSequenceWeighting.cpp.i
.PHONY : SimilarityBasedSequenceWeighting.cpp.i

SimilarityBasedSequenceWeighting.s: SimilarityBasedSequenceWeighting.cpp.s
.PHONY : SimilarityBasedSequenceWeighting.s

# target to generate assembly for a file
SimilarityBasedSequenceWeighting.cpp.s:
	cd /Users/yoshiaki/tmp/tops && $(MAKE) -f src/CMakeFiles/ToPS.dir/build.make src/CMakeFiles/ToPS.dir/SimilarityBasedSequenceWeighting.cpp.s
.PHONY : SimilarityBasedSequenceWeighting.cpp.s

SimilarityBasedSequenceWeightingCreator.o: SimilarityBasedSequenceWeightingCreator.cpp.o
.PHONY : SimilarityBasedSequenceWeightingCreator.o

# target to build an object file
SimilarityBasedSequenceWeightingCreator.cpp.o:
	cd /Users/yoshiaki/tmp/tops && $(MAKE) -f src/CMakeFiles/ToPS.dir/build.make src/CMakeFiles/ToPS.dir/SimilarityBasedSequenceWeightingCreator.cpp.o
.PHONY : SimilarityBasedSequenceWeightingCreator.cpp.o

SimilarityBasedSequenceWeightingCreator.i: SimilarityBasedSequenceWeightingCreator.cpp.i
.PHONY : SimilarityBasedSequenceWeightingCreator.i

# target to preprocess a source file
SimilarityBasedSequenceWeightingCreator.cpp.i:
	cd /Users/yoshiaki/tmp/tops && $(MAKE) -f src/CMakeFiles/ToPS.dir/build.make src/CMakeFiles/ToPS.dir/SimilarityBasedSequenceWeightingCreator.cpp.i
.PHONY : SimilarityBasedSequenceWeightingCreator.cpp.i

SimilarityBasedSequenceWeightingCreator.s: SimilarityBasedSequenceWeightingCreator.cpp.s
.PHONY : SimilarityBasedSequenceWeightingCreator.s

# target to generate assembly for a file
SimilarityBasedSequenceWeightingCreator.cpp.s:
	cd /Users/yoshiaki/tmp/tops && $(MAKE) -f src/CMakeFiles/ToPS.dir/build.make src/CMakeFiles/ToPS.dir/SimilarityBasedSequenceWeightingCreator.cpp.s
.PHONY : SimilarityBasedSequenceWeightingCreator.cpp.s

SmoothedHistogramBurge.o: SmoothedHistogramBurge.cpp.o
.PHONY : SmoothedHistogramBurge.o

# target to build an object file
SmoothedHistogramBurge.cpp.o:
	cd /Users/yoshiaki/tmp/tops && $(MAKE) -f src/CMakeFiles/ToPS.dir/build.make src/CMakeFiles/ToPS.dir/SmoothedHistogramBurge.cpp.o
.PHONY : SmoothedHistogramBurge.cpp.o

SmoothedHistogramBurge.i: SmoothedHistogramBurge.cpp.i
.PHONY : SmoothedHistogramBurge.i

# target to preprocess a source file
SmoothedHistogramBurge.cpp.i:
	cd /Users/yoshiaki/tmp/tops && $(MAKE) -f src/CMakeFiles/ToPS.dir/build.make src/CMakeFiles/ToPS.dir/SmoothedHistogramBurge.cpp.i
.PHONY : SmoothedHistogramBurge.cpp.i

SmoothedHistogramBurge.s: SmoothedHistogramBurge.cpp.s
.PHONY : SmoothedHistogramBurge.s

# target to generate assembly for a file
SmoothedHistogramBurge.cpp.s:
	cd /Users/yoshiaki/tmp/tops && $(MAKE) -f src/CMakeFiles/ToPS.dir/build.make src/CMakeFiles/ToPS.dir/SmoothedHistogramBurge.cpp.s
.PHONY : SmoothedHistogramBurge.cpp.s

SmoothedHistogramKernelDensity.o: SmoothedHistogramKernelDensity.cpp.o
.PHONY : SmoothedHistogramKernelDensity.o

# target to build an object file
SmoothedHistogramKernelDensity.cpp.o:
	cd /Users/yoshiaki/tmp/tops && $(MAKE) -f src/CMakeFiles/ToPS.dir/build.make src/CMakeFiles/ToPS.dir/SmoothedHistogramKernelDensity.cpp.o
.PHONY : SmoothedHistogramKernelDensity.cpp.o

SmoothedHistogramKernelDensity.i: SmoothedHistogramKernelDensity.cpp.i
.PHONY : SmoothedHistogramKernelDensity.i

# target to preprocess a source file
SmoothedHistogramKernelDensity.cpp.i:
	cd /Users/yoshiaki/tmp/tops && $(MAKE) -f src/CMakeFiles/ToPS.dir/build.make src/CMakeFiles/ToPS.dir/SmoothedHistogramKernelDensity.cpp.i
.PHONY : SmoothedHistogramKernelDensity.cpp.i

SmoothedHistogramKernelDensity.s: SmoothedHistogramKernelDensity.cpp.s
.PHONY : SmoothedHistogramKernelDensity.s

# target to generate assembly for a file
SmoothedHistogramKernelDensity.cpp.s:
	cd /Users/yoshiaki/tmp/tops && $(MAKE) -f src/CMakeFiles/ToPS.dir/build.make src/CMakeFiles/ToPS.dir/SmoothedHistogramKernelDensity.cpp.s
.PHONY : SmoothedHistogramKernelDensity.cpp.s

SmoothedHistogramStanke.o: SmoothedHistogramStanke.cpp.o
.PHONY : SmoothedHistogramStanke.o

# target to build an object file
SmoothedHistogramStanke.cpp.o:
	cd /Users/yoshiaki/tmp/tops && $(MAKE) -f src/CMakeFiles/ToPS.dir/build.make src/CMakeFiles/ToPS.dir/SmoothedHistogramStanke.cpp.o
.PHONY : SmoothedHistogramStanke.cpp.o

SmoothedHistogramStanke.i: SmoothedHistogramStanke.cpp.i
.PHONY : SmoothedHistogramStanke.i

# target to preprocess a source file
SmoothedHistogramStanke.cpp.i:
	cd /Users/yoshiaki/tmp/tops && $(MAKE) -f src/CMakeFiles/ToPS.dir/build.make src/CMakeFiles/ToPS.dir/SmoothedHistogramStanke.cpp.i
.PHONY : SmoothedHistogramStanke.cpp.i

SmoothedHistogramStanke.s: SmoothedHistogramStanke.cpp.s
.PHONY : SmoothedHistogramStanke.s

# target to generate assembly for a file
SmoothedHistogramStanke.cpp.s:
	cd /Users/yoshiaki/tmp/tops && $(MAKE) -f src/CMakeFiles/ToPS.dir/build.make src/CMakeFiles/ToPS.dir/SmoothedHistogramStanke.cpp.s
.PHONY : SmoothedHistogramStanke.cpp.s

SparseMatrix.o: SparseMatrix.cpp.o
.PHONY : SparseMatrix.o

# target to build an object file
SparseMatrix.cpp.o:
	cd /Users/yoshiaki/tmp/tops && $(MAKE) -f src/CMakeFiles/ToPS.dir/build.make src/CMakeFiles/ToPS.dir/SparseMatrix.cpp.o
.PHONY : SparseMatrix.cpp.o

SparseMatrix.i: SparseMatrix.cpp.i
.PHONY : SparseMatrix.i

# target to preprocess a source file
SparseMatrix.cpp.i:
	cd /Users/yoshiaki/tmp/tops && $(MAKE) -f src/CMakeFiles/ToPS.dir/build.make src/CMakeFiles/ToPS.dir/SparseMatrix.cpp.i
.PHONY : SparseMatrix.cpp.i

SparseMatrix.s: SparseMatrix.cpp.s
.PHONY : SparseMatrix.s

# target to generate assembly for a file
SparseMatrix.cpp.s:
	cd /Users/yoshiaki/tmp/tops && $(MAKE) -f src/CMakeFiles/ToPS.dir/build.make src/CMakeFiles/ToPS.dir/SparseMatrix.cpp.s
.PHONY : SparseMatrix.cpp.s

StoreLoadedModel.o: StoreLoadedModel.cpp.o
.PHONY : StoreLoadedModel.o

# target to build an object file
StoreLoadedModel.cpp.o:
	cd /Users/yoshiaki/tmp/tops && $(MAKE) -f src/CMakeFiles/ToPS.dir/build.make src/CMakeFiles/ToPS.dir/StoreLoadedModel.cpp.o
.PHONY : StoreLoadedModel.cpp.o

StoreLoadedModel.i: StoreLoadedModel.cpp.i
.PHONY : StoreLoadedModel.i

# target to preprocess a source file
StoreLoadedModel.cpp.i:
	cd /Users/yoshiaki/tmp/tops && $(MAKE) -f src/CMakeFiles/ToPS.dir/build.make src/CMakeFiles/ToPS.dir/StoreLoadedModel.cpp.i
.PHONY : StoreLoadedModel.cpp.i

StoreLoadedModel.s: StoreLoadedModel.cpp.s
.PHONY : StoreLoadedModel.s

# target to generate assembly for a file
StoreLoadedModel.cpp.s:
	cd /Users/yoshiaki/tmp/tops && $(MAKE) -f src/CMakeFiles/ToPS.dir/build.make src/CMakeFiles/ToPS.dir/StoreLoadedModel.cpp.s
.PHONY : StoreLoadedModel.cpp.s

Symbol.o: Symbol.cpp.o
.PHONY : Symbol.o

# target to build an object file
Symbol.cpp.o:
	cd /Users/yoshiaki/tmp/tops && $(MAKE) -f src/CMakeFiles/ToPS.dir/build.make src/CMakeFiles/ToPS.dir/Symbol.cpp.o
.PHONY : Symbol.cpp.o

Symbol.i: Symbol.cpp.i
.PHONY : Symbol.i

# target to preprocess a source file
Symbol.cpp.i:
	cd /Users/yoshiaki/tmp/tops && $(MAKE) -f src/CMakeFiles/ToPS.dir/build.make src/CMakeFiles/ToPS.dir/Symbol.cpp.i
.PHONY : Symbol.cpp.i

Symbol.s: Symbol.cpp.s
.PHONY : Symbol.s

# target to generate assembly for a file
Symbol.cpp.s:
	cd /Users/yoshiaki/tmp/tops && $(MAKE) -f src/CMakeFiles/ToPS.dir/build.make src/CMakeFiles/ToPS.dir/Symbol.cpp.s
.PHONY : Symbol.cpp.s

TargetModel.o: TargetModel.cpp.o
.PHONY : TargetModel.o

# target to build an object file
TargetModel.cpp.o:
	cd /Users/yoshiaki/tmp/tops && $(MAKE) -f src/CMakeFiles/ToPS.dir/build.make src/CMakeFiles/ToPS.dir/TargetModel.cpp.o
.PHONY : TargetModel.cpp.o

TargetModel.i: TargetModel.cpp.i
.PHONY : TargetModel.i

# target to preprocess a source file
TargetModel.cpp.i:
	cd /Users/yoshiaki/tmp/tops && $(MAKE) -f src/CMakeFiles/ToPS.dir/build.make src/CMakeFiles/ToPS.dir/TargetModel.cpp.i
.PHONY : TargetModel.cpp.i

TargetModel.s: TargetModel.cpp.s
.PHONY : TargetModel.s

# target to generate assembly for a file
TargetModel.cpp.s:
	cd /Users/yoshiaki/tmp/tops && $(MAKE) -f src/CMakeFiles/ToPS.dir/build.make src/CMakeFiles/ToPS.dir/TargetModel.cpp.s
.PHONY : TargetModel.cpp.s

TargetModelCreator.o: TargetModelCreator.cpp.o
.PHONY : TargetModelCreator.o

# target to build an object file
TargetModelCreator.cpp.o:
	cd /Users/yoshiaki/tmp/tops && $(MAKE) -f src/CMakeFiles/ToPS.dir/build.make src/CMakeFiles/ToPS.dir/TargetModelCreator.cpp.o
.PHONY : TargetModelCreator.cpp.o

TargetModelCreator.i: TargetModelCreator.cpp.i
.PHONY : TargetModelCreator.i

# target to preprocess a source file
TargetModelCreator.cpp.i:
	cd /Users/yoshiaki/tmp/tops && $(MAKE) -f src/CMakeFiles/ToPS.dir/build.make src/CMakeFiles/ToPS.dir/TargetModelCreator.cpp.i
.PHONY : TargetModelCreator.cpp.i

TargetModelCreator.s: TargetModelCreator.cpp.s
.PHONY : TargetModelCreator.s

# target to generate assembly for a file
TargetModelCreator.cpp.s:
	cd /Users/yoshiaki/tmp/tops && $(MAKE) -f src/CMakeFiles/ToPS.dir/build.make src/CMakeFiles/ToPS.dir/TargetModelCreator.cpp.s
.PHONY : TargetModelCreator.cpp.s

TrainDiscreteIIDModel.o: TrainDiscreteIIDModel.cpp.o
.PHONY : TrainDiscreteIIDModel.o

# target to build an object file
TrainDiscreteIIDModel.cpp.o:
	cd /Users/yoshiaki/tmp/tops && $(MAKE) -f src/CMakeFiles/ToPS.dir/build.make src/CMakeFiles/ToPS.dir/TrainDiscreteIIDModel.cpp.o
.PHONY : TrainDiscreteIIDModel.cpp.o

TrainDiscreteIIDModel.i: TrainDiscreteIIDModel.cpp.i
.PHONY : TrainDiscreteIIDModel.i

# target to preprocess a source file
TrainDiscreteIIDModel.cpp.i:
	cd /Users/yoshiaki/tmp/tops && $(MAKE) -f src/CMakeFiles/ToPS.dir/build.make src/CMakeFiles/ToPS.dir/TrainDiscreteIIDModel.cpp.i
.PHONY : TrainDiscreteIIDModel.cpp.i

TrainDiscreteIIDModel.s: TrainDiscreteIIDModel.cpp.s
.PHONY : TrainDiscreteIIDModel.s

# target to generate assembly for a file
TrainDiscreteIIDModel.cpp.s:
	cd /Users/yoshiaki/tmp/tops && $(MAKE) -f src/CMakeFiles/ToPS.dir/build.make src/CMakeFiles/ToPS.dir/TrainDiscreteIIDModel.cpp.s
.PHONY : TrainDiscreteIIDModel.cpp.s

TrainFixedLengthMarkovChain.o: TrainFixedLengthMarkovChain.cpp.o
.PHONY : TrainFixedLengthMarkovChain.o

# target to build an object file
TrainFixedLengthMarkovChain.cpp.o:
	cd /Users/yoshiaki/tmp/tops && $(MAKE) -f src/CMakeFiles/ToPS.dir/build.make src/CMakeFiles/ToPS.dir/TrainFixedLengthMarkovChain.cpp.o
.PHONY : TrainFixedLengthMarkovChain.cpp.o

TrainFixedLengthMarkovChain.i: TrainFixedLengthMarkovChain.cpp.i
.PHONY : TrainFixedLengthMarkovChain.i

# target to preprocess a source file
TrainFixedLengthMarkovChain.cpp.i:
	cd /Users/yoshiaki/tmp/tops && $(MAKE) -f src/CMakeFiles/ToPS.dir/build.make src/CMakeFiles/ToPS.dir/TrainFixedLengthMarkovChain.cpp.i
.PHONY : TrainFixedLengthMarkovChain.cpp.i

TrainFixedLengthMarkovChain.s: TrainFixedLengthMarkovChain.cpp.s
.PHONY : TrainFixedLengthMarkovChain.s

# target to generate assembly for a file
TrainFixedLengthMarkovChain.cpp.s:
	cd /Users/yoshiaki/tmp/tops && $(MAKE) -f src/CMakeFiles/ToPS.dir/build.make src/CMakeFiles/ToPS.dir/TrainFixedLengthMarkovChain.cpp.s
.PHONY : TrainFixedLengthMarkovChain.cpp.s

TrainGHMMTransitions.o: TrainGHMMTransitions.cpp.o
.PHONY : TrainGHMMTransitions.o

# target to build an object file
TrainGHMMTransitions.cpp.o:
	cd /Users/yoshiaki/tmp/tops && $(MAKE) -f src/CMakeFiles/ToPS.dir/build.make src/CMakeFiles/ToPS.dir/TrainGHMMTransitions.cpp.o
.PHONY : TrainGHMMTransitions.cpp.o

TrainGHMMTransitions.i: TrainGHMMTransitions.cpp.i
.PHONY : TrainGHMMTransitions.i

# target to preprocess a source file
TrainGHMMTransitions.cpp.i:
	cd /Users/yoshiaki/tmp/tops && $(MAKE) -f src/CMakeFiles/ToPS.dir/build.make src/CMakeFiles/ToPS.dir/TrainGHMMTransitions.cpp.i
.PHONY : TrainGHMMTransitions.cpp.i

TrainGHMMTransitions.s: TrainGHMMTransitions.cpp.s
.PHONY : TrainGHMMTransitions.s

# target to generate assembly for a file
TrainGHMMTransitions.cpp.s:
	cd /Users/yoshiaki/tmp/tops && $(MAKE) -f src/CMakeFiles/ToPS.dir/build.make src/CMakeFiles/ToPS.dir/TrainGHMMTransitions.cpp.s
.PHONY : TrainGHMMTransitions.cpp.s

TrainHMMBaumWelch.o: TrainHMMBaumWelch.cpp.o
.PHONY : TrainHMMBaumWelch.o

# target to build an object file
TrainHMMBaumWelch.cpp.o:
	cd /Users/yoshiaki/tmp/tops && $(MAKE) -f src/CMakeFiles/ToPS.dir/build.make src/CMakeFiles/ToPS.dir/TrainHMMBaumWelch.cpp.o
.PHONY : TrainHMMBaumWelch.cpp.o

TrainHMMBaumWelch.i: TrainHMMBaumWelch.cpp.i
.PHONY : TrainHMMBaumWelch.i

# target to preprocess a source file
TrainHMMBaumWelch.cpp.i:
	cd /Users/yoshiaki/tmp/tops && $(MAKE) -f src/CMakeFiles/ToPS.dir/build.make src/CMakeFiles/ToPS.dir/TrainHMMBaumWelch.cpp.i
.PHONY : TrainHMMBaumWelch.cpp.i

TrainHMMBaumWelch.s: TrainHMMBaumWelch.cpp.s
.PHONY : TrainHMMBaumWelch.s

# target to generate assembly for a file
TrainHMMBaumWelch.cpp.s:
	cd /Users/yoshiaki/tmp/tops && $(MAKE) -f src/CMakeFiles/ToPS.dir/build.make src/CMakeFiles/ToPS.dir/TrainHMMBaumWelch.cpp.s
.PHONY : TrainHMMBaumWelch.cpp.s

TrainHMMMaximumLikelihood.o: TrainHMMMaximumLikelihood.cpp.o
.PHONY : TrainHMMMaximumLikelihood.o

# target to build an object file
TrainHMMMaximumLikelihood.cpp.o:
	cd /Users/yoshiaki/tmp/tops && $(MAKE) -f src/CMakeFiles/ToPS.dir/build.make src/CMakeFiles/ToPS.dir/TrainHMMMaximumLikelihood.cpp.o
.PHONY : TrainHMMMaximumLikelihood.cpp.o

TrainHMMMaximumLikelihood.i: TrainHMMMaximumLikelihood.cpp.i
.PHONY : TrainHMMMaximumLikelihood.i

# target to preprocess a source file
TrainHMMMaximumLikelihood.cpp.i:
	cd /Users/yoshiaki/tmp/tops && $(MAKE) -f src/CMakeFiles/ToPS.dir/build.make src/CMakeFiles/ToPS.dir/TrainHMMMaximumLikelihood.cpp.i
.PHONY : TrainHMMMaximumLikelihood.cpp.i

TrainHMMMaximumLikelihood.s: TrainHMMMaximumLikelihood.cpp.s
.PHONY : TrainHMMMaximumLikelihood.s

# target to generate assembly for a file
TrainHMMMaximumLikelihood.cpp.s:
	cd /Users/yoshiaki/tmp/tops && $(MAKE) -f src/CMakeFiles/ToPS.dir/build.make src/CMakeFiles/ToPS.dir/TrainHMMMaximumLikelihood.cpp.s
.PHONY : TrainHMMMaximumLikelihood.cpp.s

TrainInterpolatedMarkovChain.o: TrainInterpolatedMarkovChain.cpp.o
.PHONY : TrainInterpolatedMarkovChain.o

# target to build an object file
TrainInterpolatedMarkovChain.cpp.o:
	cd /Users/yoshiaki/tmp/tops && $(MAKE) -f src/CMakeFiles/ToPS.dir/build.make src/CMakeFiles/ToPS.dir/TrainInterpolatedMarkovChain.cpp.o
.PHONY : TrainInterpolatedMarkovChain.cpp.o

TrainInterpolatedMarkovChain.i: TrainInterpolatedMarkovChain.cpp.i
.PHONY : TrainInterpolatedMarkovChain.i

# target to preprocess a source file
TrainInterpolatedMarkovChain.cpp.i:
	cd /Users/yoshiaki/tmp/tops && $(MAKE) -f src/CMakeFiles/ToPS.dir/build.make src/CMakeFiles/ToPS.dir/TrainInterpolatedMarkovChain.cpp.i
.PHONY : TrainInterpolatedMarkovChain.cpp.i

TrainInterpolatedMarkovChain.s: TrainInterpolatedMarkovChain.cpp.s
.PHONY : TrainInterpolatedMarkovChain.s

# target to generate assembly for a file
TrainInterpolatedMarkovChain.cpp.s:
	cd /Users/yoshiaki/tmp/tops && $(MAKE) -f src/CMakeFiles/ToPS.dir/build.make src/CMakeFiles/ToPS.dir/TrainInterpolatedMarkovChain.cpp.s
.PHONY : TrainInterpolatedMarkovChain.cpp.s

TrainInterpolatedPhasedMarkovChain.o: TrainInterpolatedPhasedMarkovChain.cpp.o
.PHONY : TrainInterpolatedPhasedMarkovChain.o

# target to build an object file
TrainInterpolatedPhasedMarkovChain.cpp.o:
	cd /Users/yoshiaki/tmp/tops && $(MAKE) -f src/CMakeFiles/ToPS.dir/build.make src/CMakeFiles/ToPS.dir/TrainInterpolatedPhasedMarkovChain.cpp.o
.PHONY : TrainInterpolatedPhasedMarkovChain.cpp.o

TrainInterpolatedPhasedMarkovChain.i: TrainInterpolatedPhasedMarkovChain.cpp.i
.PHONY : TrainInterpolatedPhasedMarkovChain.i

# target to preprocess a source file
TrainInterpolatedPhasedMarkovChain.cpp.i:
	cd /Users/yoshiaki/tmp/tops && $(MAKE) -f src/CMakeFiles/ToPS.dir/build.make src/CMakeFiles/ToPS.dir/TrainInterpolatedPhasedMarkovChain.cpp.i
.PHONY : TrainInterpolatedPhasedMarkovChain.cpp.i

TrainInterpolatedPhasedMarkovChain.s: TrainInterpolatedPhasedMarkovChain.cpp.s
.PHONY : TrainInterpolatedPhasedMarkovChain.s

# target to generate assembly for a file
TrainInterpolatedPhasedMarkovChain.cpp.s:
	cd /Users/yoshiaki/tmp/tops && $(MAKE) -f src/CMakeFiles/ToPS.dir/build.make src/CMakeFiles/ToPS.dir/TrainInterpolatedPhasedMarkovChain.cpp.s
.PHONY : TrainInterpolatedPhasedMarkovChain.cpp.s

TrainPHMMBaumWelch.o: TrainPHMMBaumWelch.cpp.o
.PHONY : TrainPHMMBaumWelch.o

# target to build an object file
TrainPHMMBaumWelch.cpp.o:
	cd /Users/yoshiaki/tmp/tops && $(MAKE) -f src/CMakeFiles/ToPS.dir/build.make src/CMakeFiles/ToPS.dir/TrainPHMMBaumWelch.cpp.o
.PHONY : TrainPHMMBaumWelch.cpp.o

TrainPHMMBaumWelch.i: TrainPHMMBaumWelch.cpp.i
.PHONY : TrainPHMMBaumWelch.i

# target to preprocess a source file
TrainPHMMBaumWelch.cpp.i:
	cd /Users/yoshiaki/tmp/tops && $(MAKE) -f src/CMakeFiles/ToPS.dir/build.make src/CMakeFiles/ToPS.dir/TrainPHMMBaumWelch.cpp.i
.PHONY : TrainPHMMBaumWelch.cpp.i

TrainPHMMBaumWelch.s: TrainPHMMBaumWelch.cpp.s
.PHONY : TrainPHMMBaumWelch.s

# target to generate assembly for a file
TrainPHMMBaumWelch.cpp.s:
	cd /Users/yoshiaki/tmp/tops && $(MAKE) -f src/CMakeFiles/ToPS.dir/build.make src/CMakeFiles/ToPS.dir/TrainPHMMBaumWelch.cpp.s
.PHONY : TrainPHMMBaumWelch.cpp.s

TrainPhasedMarkovChain.o: TrainPhasedMarkovChain.cpp.o
.PHONY : TrainPhasedMarkovChain.o

# target to build an object file
TrainPhasedMarkovChain.cpp.o:
	cd /Users/yoshiaki/tmp/tops && $(MAKE) -f src/CMakeFiles/ToPS.dir/build.make src/CMakeFiles/ToPS.dir/TrainPhasedMarkovChain.cpp.o
.PHONY : TrainPhasedMarkovChain.cpp.o

TrainPhasedMarkovChain.i: TrainPhasedMarkovChain.cpp.i
.PHONY : TrainPhasedMarkovChain.i

# target to preprocess a source file
TrainPhasedMarkovChain.cpp.i:
	cd /Users/yoshiaki/tmp/tops && $(MAKE) -f src/CMakeFiles/ToPS.dir/build.make src/CMakeFiles/ToPS.dir/TrainPhasedMarkovChain.cpp.i
.PHONY : TrainPhasedMarkovChain.cpp.i

TrainPhasedMarkovChain.s: TrainPhasedMarkovChain.cpp.s
.PHONY : TrainPhasedMarkovChain.s

# target to generate assembly for a file
TrainPhasedMarkovChain.cpp.s:
	cd /Users/yoshiaki/tmp/tops && $(MAKE) -f src/CMakeFiles/ToPS.dir/build.make src/CMakeFiles/ToPS.dir/TrainPhasedMarkovChain.cpp.s
.PHONY : TrainPhasedMarkovChain.cpp.s

TrainPhasedMarkovChainContextAlgorithm.o: TrainPhasedMarkovChainContextAlgorithm.cpp.o
.PHONY : TrainPhasedMarkovChainContextAlgorithm.o

# target to build an object file
TrainPhasedMarkovChainContextAlgorithm.cpp.o:
	cd /Users/yoshiaki/tmp/tops && $(MAKE) -f src/CMakeFiles/ToPS.dir/build.make src/CMakeFiles/ToPS.dir/TrainPhasedMarkovChainContextAlgorithm.cpp.o
.PHONY : TrainPhasedMarkovChainContextAlgorithm.cpp.o

TrainPhasedMarkovChainContextAlgorithm.i: TrainPhasedMarkovChainContextAlgorithm.cpp.i
.PHONY : TrainPhasedMarkovChainContextAlgorithm.i

# target to preprocess a source file
TrainPhasedMarkovChainContextAlgorithm.cpp.i:
	cd /Users/yoshiaki/tmp/tops && $(MAKE) -f src/CMakeFiles/ToPS.dir/build.make src/CMakeFiles/ToPS.dir/TrainPhasedMarkovChainContextAlgorithm.cpp.i
.PHONY : TrainPhasedMarkovChainContextAlgorithm.cpp.i

TrainPhasedMarkovChainContextAlgorithm.s: TrainPhasedMarkovChainContextAlgorithm.cpp.s
.PHONY : TrainPhasedMarkovChainContextAlgorithm.s

# target to generate assembly for a file
TrainPhasedMarkovChainContextAlgorithm.cpp.s:
	cd /Users/yoshiaki/tmp/tops && $(MAKE) -f src/CMakeFiles/ToPS.dir/build.make src/CMakeFiles/ToPS.dir/TrainPhasedMarkovChainContextAlgorithm.cpp.s
.PHONY : TrainPhasedMarkovChainContextAlgorithm.cpp.s

TrainProfileHMMBaumWelch.o: TrainProfileHMMBaumWelch.cpp.o
.PHONY : TrainProfileHMMBaumWelch.o

# target to build an object file
TrainProfileHMMBaumWelch.cpp.o:
	cd /Users/yoshiaki/tmp/tops && $(MAKE) -f src/CMakeFiles/ToPS.dir/build.make src/CMakeFiles/ToPS.dir/TrainProfileHMMBaumWelch.cpp.o
.PHONY : TrainProfileHMMBaumWelch.cpp.o

TrainProfileHMMBaumWelch.i: TrainProfileHMMBaumWelch.cpp.i
.PHONY : TrainProfileHMMBaumWelch.i

# target to preprocess a source file
TrainProfileHMMBaumWelch.cpp.i:
	cd /Users/yoshiaki/tmp/tops && $(MAKE) -f src/CMakeFiles/ToPS.dir/build.make src/CMakeFiles/ToPS.dir/TrainProfileHMMBaumWelch.cpp.i
.PHONY : TrainProfileHMMBaumWelch.cpp.i

TrainProfileHMMBaumWelch.s: TrainProfileHMMBaumWelch.cpp.s
.PHONY : TrainProfileHMMBaumWelch.s

# target to generate assembly for a file
TrainProfileHMMBaumWelch.cpp.s:
	cd /Users/yoshiaki/tmp/tops && $(MAKE) -f src/CMakeFiles/ToPS.dir/build.make src/CMakeFiles/ToPS.dir/TrainProfileHMMBaumWelch.cpp.s
.PHONY : TrainProfileHMMBaumWelch.cpp.s

TrainProfileHMMMaxLikelihood.o: TrainProfileHMMMaxLikelihood.cpp.o
.PHONY : TrainProfileHMMMaxLikelihood.o

# target to build an object file
TrainProfileHMMMaxLikelihood.cpp.o:
	cd /Users/yoshiaki/tmp/tops && $(MAKE) -f src/CMakeFiles/ToPS.dir/build.make src/CMakeFiles/ToPS.dir/TrainProfileHMMMaxLikelihood.cpp.o
.PHONY : TrainProfileHMMMaxLikelihood.cpp.o

TrainProfileHMMMaxLikelihood.i: TrainProfileHMMMaxLikelihood.cpp.i
.PHONY : TrainProfileHMMMaxLikelihood.i

# target to preprocess a source file
TrainProfileHMMMaxLikelihood.cpp.i:
	cd /Users/yoshiaki/tmp/tops && $(MAKE) -f src/CMakeFiles/ToPS.dir/build.make src/CMakeFiles/ToPS.dir/TrainProfileHMMMaxLikelihood.cpp.i
.PHONY : TrainProfileHMMMaxLikelihood.cpp.i

TrainProfileHMMMaxLikelihood.s: TrainProfileHMMMaxLikelihood.cpp.s
.PHONY : TrainProfileHMMMaxLikelihood.s

# target to generate assembly for a file
TrainProfileHMMMaxLikelihood.cpp.s:
	cd /Users/yoshiaki/tmp/tops && $(MAKE) -f src/CMakeFiles/ToPS.dir/build.make src/CMakeFiles/ToPS.dir/TrainProfileHMMMaxLikelihood.cpp.s
.PHONY : TrainProfileHMMMaxLikelihood.cpp.s

TrainSimilarityBasedSequenceWeighting.o: TrainSimilarityBasedSequenceWeighting.cpp.o
.PHONY : TrainSimilarityBasedSequenceWeighting.o

# target to build an object file
TrainSimilarityBasedSequenceWeighting.cpp.o:
	cd /Users/yoshiaki/tmp/tops && $(MAKE) -f src/CMakeFiles/ToPS.dir/build.make src/CMakeFiles/ToPS.dir/TrainSimilarityBasedSequenceWeighting.cpp.o
.PHONY : TrainSimilarityBasedSequenceWeighting.cpp.o

TrainSimilarityBasedSequenceWeighting.i: TrainSimilarityBasedSequenceWeighting.cpp.i
.PHONY : TrainSimilarityBasedSequenceWeighting.i

# target to preprocess a source file
TrainSimilarityBasedSequenceWeighting.cpp.i:
	cd /Users/yoshiaki/tmp/tops && $(MAKE) -f src/CMakeFiles/ToPS.dir/build.make src/CMakeFiles/ToPS.dir/TrainSimilarityBasedSequenceWeighting.cpp.i
.PHONY : TrainSimilarityBasedSequenceWeighting.cpp.i

TrainSimilarityBasedSequenceWeighting.s: TrainSimilarityBasedSequenceWeighting.cpp.s
.PHONY : TrainSimilarityBasedSequenceWeighting.s

# target to generate assembly for a file
TrainSimilarityBasedSequenceWeighting.cpp.s:
	cd /Users/yoshiaki/tmp/tops && $(MAKE) -f src/CMakeFiles/ToPS.dir/build.make src/CMakeFiles/ToPS.dir/TrainSimilarityBasedSequenceWeighting.cpp.s
.PHONY : TrainSimilarityBasedSequenceWeighting.cpp.s

TrainVariableLengthInhomogeneousMarkovChain.o: TrainVariableLengthInhomogeneousMarkovChain.cpp.o
.PHONY : TrainVariableLengthInhomogeneousMarkovChain.o

# target to build an object file
TrainVariableLengthInhomogeneousMarkovChain.cpp.o:
	cd /Users/yoshiaki/tmp/tops && $(MAKE) -f src/CMakeFiles/ToPS.dir/build.make src/CMakeFiles/ToPS.dir/TrainVariableLengthInhomogeneousMarkovChain.cpp.o
.PHONY : TrainVariableLengthInhomogeneousMarkovChain.cpp.o

TrainVariableLengthInhomogeneousMarkovChain.i: TrainVariableLengthInhomogeneousMarkovChain.cpp.i
.PHONY : TrainVariableLengthInhomogeneousMarkovChain.i

# target to preprocess a source file
TrainVariableLengthInhomogeneousMarkovChain.cpp.i:
	cd /Users/yoshiaki/tmp/tops && $(MAKE) -f src/CMakeFiles/ToPS.dir/build.make src/CMakeFiles/ToPS.dir/TrainVariableLengthInhomogeneousMarkovChain.cpp.i
.PHONY : TrainVariableLengthInhomogeneousMarkovChain.cpp.i

TrainVariableLengthInhomogeneousMarkovChain.s: TrainVariableLengthInhomogeneousMarkovChain.cpp.s
.PHONY : TrainVariableLengthInhomogeneousMarkovChain.s

# target to generate assembly for a file
TrainVariableLengthInhomogeneousMarkovChain.cpp.s:
	cd /Users/yoshiaki/tmp/tops && $(MAKE) -f src/CMakeFiles/ToPS.dir/build.make src/CMakeFiles/ToPS.dir/TrainVariableLengthInhomogeneousMarkovChain.cpp.s
.PHONY : TrainVariableLengthInhomogeneousMarkovChain.cpp.s

TrainVariableLengthMarkovChain.o: TrainVariableLengthMarkovChain.cpp.o
.PHONY : TrainVariableLengthMarkovChain.o

# target to build an object file
TrainVariableLengthMarkovChain.cpp.o:
	cd /Users/yoshiaki/tmp/tops && $(MAKE) -f src/CMakeFiles/ToPS.dir/build.make src/CMakeFiles/ToPS.dir/TrainVariableLengthMarkovChain.cpp.o
.PHONY : TrainVariableLengthMarkovChain.cpp.o

TrainVariableLengthMarkovChain.i: TrainVariableLengthMarkovChain.cpp.i
.PHONY : TrainVariableLengthMarkovChain.i

# target to preprocess a source file
TrainVariableLengthMarkovChain.cpp.i:
	cd /Users/yoshiaki/tmp/tops && $(MAKE) -f src/CMakeFiles/ToPS.dir/build.make src/CMakeFiles/ToPS.dir/TrainVariableLengthMarkovChain.cpp.i
.PHONY : TrainVariableLengthMarkovChain.cpp.i

TrainVariableLengthMarkovChain.s: TrainVariableLengthMarkovChain.cpp.s
.PHONY : TrainVariableLengthMarkovChain.s

# target to generate assembly for a file
TrainVariableLengthMarkovChain.cpp.s:
	cd /Users/yoshiaki/tmp/tops && $(MAKE) -f src/CMakeFiles/ToPS.dir/build.make src/CMakeFiles/ToPS.dir/TrainVariableLengthMarkovChain.cpp.s
.PHONY : TrainVariableLengthMarkovChain.cpp.s

TrainWeightArrayModel.o: TrainWeightArrayModel.cpp.o
.PHONY : TrainWeightArrayModel.o

# target to build an object file
TrainWeightArrayModel.cpp.o:
	cd /Users/yoshiaki/tmp/tops && $(MAKE) -f src/CMakeFiles/ToPS.dir/build.make src/CMakeFiles/ToPS.dir/TrainWeightArrayModel.cpp.o
.PHONY : TrainWeightArrayModel.cpp.o

TrainWeightArrayModel.i: TrainWeightArrayModel.cpp.i
.PHONY : TrainWeightArrayModel.i

# target to preprocess a source file
TrainWeightArrayModel.cpp.i:
	cd /Users/yoshiaki/tmp/tops && $(MAKE) -f src/CMakeFiles/ToPS.dir/build.make src/CMakeFiles/ToPS.dir/TrainWeightArrayModel.cpp.i
.PHONY : TrainWeightArrayModel.cpp.i

TrainWeightArrayModel.s: TrainWeightArrayModel.cpp.s
.PHONY : TrainWeightArrayModel.s

# target to generate assembly for a file
TrainWeightArrayModel.cpp.s:
	cd /Users/yoshiaki/tmp/tops && $(MAKE) -f src/CMakeFiles/ToPS.dir/build.make src/CMakeFiles/ToPS.dir/TrainWeightArrayModel.cpp.s
.PHONY : TrainWeightArrayModel.cpp.s

VariableLengthMarkovChain.o: VariableLengthMarkovChain.cpp.o
.PHONY : VariableLengthMarkovChain.o

# target to build an object file
VariableLengthMarkovChain.cpp.o:
	cd /Users/yoshiaki/tmp/tops && $(MAKE) -f src/CMakeFiles/ToPS.dir/build.make src/CMakeFiles/ToPS.dir/VariableLengthMarkovChain.cpp.o
.PHONY : VariableLengthMarkovChain.cpp.o

VariableLengthMarkovChain.i: VariableLengthMarkovChain.cpp.i
.PHONY : VariableLengthMarkovChain.i

# target to preprocess a source file
VariableLengthMarkovChain.cpp.i:
	cd /Users/yoshiaki/tmp/tops && $(MAKE) -f src/CMakeFiles/ToPS.dir/build.make src/CMakeFiles/ToPS.dir/VariableLengthMarkovChain.cpp.i
.PHONY : VariableLengthMarkovChain.cpp.i

VariableLengthMarkovChain.s: VariableLengthMarkovChain.cpp.s
.PHONY : VariableLengthMarkovChain.s

# target to generate assembly for a file
VariableLengthMarkovChain.cpp.s:
	cd /Users/yoshiaki/tmp/tops && $(MAKE) -f src/CMakeFiles/ToPS.dir/build.make src/CMakeFiles/ToPS.dir/VariableLengthMarkovChain.cpp.s
.PHONY : VariableLengthMarkovChain.cpp.s

VariableLengthMarkovChainCreator.o: VariableLengthMarkovChainCreator.cpp.o
.PHONY : VariableLengthMarkovChainCreator.o

# target to build an object file
VariableLengthMarkovChainCreator.cpp.o:
	cd /Users/yoshiaki/tmp/tops && $(MAKE) -f src/CMakeFiles/ToPS.dir/build.make src/CMakeFiles/ToPS.dir/VariableLengthMarkovChainCreator.cpp.o
.PHONY : VariableLengthMarkovChainCreator.cpp.o

VariableLengthMarkovChainCreator.i: VariableLengthMarkovChainCreator.cpp.i
.PHONY : VariableLengthMarkovChainCreator.i

# target to preprocess a source file
VariableLengthMarkovChainCreator.cpp.i:
	cd /Users/yoshiaki/tmp/tops && $(MAKE) -f src/CMakeFiles/ToPS.dir/build.make src/CMakeFiles/ToPS.dir/VariableLengthMarkovChainCreator.cpp.i
.PHONY : VariableLengthMarkovChainCreator.cpp.i

VariableLengthMarkovChainCreator.s: VariableLengthMarkovChainCreator.cpp.s
.PHONY : VariableLengthMarkovChainCreator.s

# target to generate assembly for a file
VariableLengthMarkovChainCreator.cpp.s:
	cd /Users/yoshiaki/tmp/tops && $(MAKE) -f src/CMakeFiles/ToPS.dir/build.make src/CMakeFiles/ToPS.dir/VariableLengthMarkovChainCreator.cpp.s
.PHONY : VariableLengthMarkovChainCreator.cpp.s

__/lang/src/ASTNode.o: __/lang/src/ASTNode.cpp.o
.PHONY : __/lang/src/ASTNode.o

# target to build an object file
__/lang/src/ASTNode.cpp.o:
	cd /Users/yoshiaki/tmp/tops && $(MAKE) -f src/CMakeFiles/ToPS.dir/build.make src/CMakeFiles/ToPS.dir/__/lang/src/ASTNode.cpp.o
.PHONY : __/lang/src/ASTNode.cpp.o

__/lang/src/ASTNode.i: __/lang/src/ASTNode.cpp.i
.PHONY : __/lang/src/ASTNode.i

# target to preprocess a source file
__/lang/src/ASTNode.cpp.i:
	cd /Users/yoshiaki/tmp/tops && $(MAKE) -f src/CMakeFiles/ToPS.dir/build.make src/CMakeFiles/ToPS.dir/__/lang/src/ASTNode.cpp.i
.PHONY : __/lang/src/ASTNode.cpp.i

__/lang/src/ASTNode.s: __/lang/src/ASTNode.cpp.s
.PHONY : __/lang/src/ASTNode.s

# target to generate assembly for a file
__/lang/src/ASTNode.cpp.s:
	cd /Users/yoshiaki/tmp/tops && $(MAKE) -f src/CMakeFiles/ToPS.dir/build.make src/CMakeFiles/ToPS.dir/__/lang/src/ASTNode.cpp.s
.PHONY : __/lang/src/ASTNode.cpp.s

__/lang/src/ConditionNode.o: __/lang/src/ConditionNode.cpp.o
.PHONY : __/lang/src/ConditionNode.o

# target to build an object file
__/lang/src/ConditionNode.cpp.o:
	cd /Users/yoshiaki/tmp/tops && $(MAKE) -f src/CMakeFiles/ToPS.dir/build.make src/CMakeFiles/ToPS.dir/__/lang/src/ConditionNode.cpp.o
.PHONY : __/lang/src/ConditionNode.cpp.o

__/lang/src/ConditionNode.i: __/lang/src/ConditionNode.cpp.i
.PHONY : __/lang/src/ConditionNode.i

# target to preprocess a source file
__/lang/src/ConditionNode.cpp.i:
	cd /Users/yoshiaki/tmp/tops && $(MAKE) -f src/CMakeFiles/ToPS.dir/build.make src/CMakeFiles/ToPS.dir/__/lang/src/ConditionNode.cpp.i
.PHONY : __/lang/src/ConditionNode.cpp.i

__/lang/src/ConditionNode.s: __/lang/src/ConditionNode.cpp.s
.PHONY : __/lang/src/ConditionNode.s

# target to generate assembly for a file
__/lang/src/ConditionNode.cpp.s:
	cd /Users/yoshiaki/tmp/tops && $(MAKE) -f src/CMakeFiles/ToPS.dir/build.make src/CMakeFiles/ToPS.dir/__/lang/src/ConditionNode.cpp.s
.PHONY : __/lang/src/ConditionNode.cpp.s

__/lang/src/ConditionalProbabilityMapNode.o: __/lang/src/ConditionalProbabilityMapNode.cpp.o
.PHONY : __/lang/src/ConditionalProbabilityMapNode.o

# target to build an object file
__/lang/src/ConditionalProbabilityMapNode.cpp.o:
	cd /Users/yoshiaki/tmp/tops && $(MAKE) -f src/CMakeFiles/ToPS.dir/build.make src/CMakeFiles/ToPS.dir/__/lang/src/ConditionalProbabilityMapNode.cpp.o
.PHONY : __/lang/src/ConditionalProbabilityMapNode.cpp.o

__/lang/src/ConditionalProbabilityMapNode.i: __/lang/src/ConditionalProbabilityMapNode.cpp.i
.PHONY : __/lang/src/ConditionalProbabilityMapNode.i

# target to preprocess a source file
__/lang/src/ConditionalProbabilityMapNode.cpp.i:
	cd /Users/yoshiaki/tmp/tops && $(MAKE) -f src/CMakeFiles/ToPS.dir/build.make src/CMakeFiles/ToPS.dir/__/lang/src/ConditionalProbabilityMapNode.cpp.i
.PHONY : __/lang/src/ConditionalProbabilityMapNode.cpp.i

__/lang/src/ConditionalProbabilityMapNode.s: __/lang/src/ConditionalProbabilityMapNode.cpp.s
.PHONY : __/lang/src/ConditionalProbabilityMapNode.s

# target to generate assembly for a file
__/lang/src/ConditionalProbabilityMapNode.cpp.s:
	cd /Users/yoshiaki/tmp/tops && $(MAKE) -f src/CMakeFiles/ToPS.dir/build.make src/CMakeFiles/ToPS.dir/__/lang/src/ConditionalProbabilityMapNode.cpp.s
.PHONY : __/lang/src/ConditionalProbabilityMapNode.cpp.s

__/lang/src/ConditionalProbabilityNode.o: __/lang/src/ConditionalProbabilityNode.cpp.o
.PHONY : __/lang/src/ConditionalProbabilityNode.o

# target to build an object file
__/lang/src/ConditionalProbabilityNode.cpp.o:
	cd /Users/yoshiaki/tmp/tops && $(MAKE) -f src/CMakeFiles/ToPS.dir/build.make src/CMakeFiles/ToPS.dir/__/lang/src/ConditionalProbabilityNode.cpp.o
.PHONY : __/lang/src/ConditionalProbabilityNode.cpp.o

__/lang/src/ConditionalProbabilityNode.i: __/lang/src/ConditionalProbabilityNode.cpp.i
.PHONY : __/lang/src/ConditionalProbabilityNode.i

# target to preprocess a source file
__/lang/src/ConditionalProbabilityNode.cpp.i:
	cd /Users/yoshiaki/tmp/tops && $(MAKE) -f src/CMakeFiles/ToPS.dir/build.make src/CMakeFiles/ToPS.dir/__/lang/src/ConditionalProbabilityNode.cpp.i
.PHONY : __/lang/src/ConditionalProbabilityNode.cpp.i

__/lang/src/ConditionalProbabilityNode.s: __/lang/src/ConditionalProbabilityNode.cpp.s
.PHONY : __/lang/src/ConditionalProbabilityNode.s

# target to generate assembly for a file
__/lang/src/ConditionalProbabilityNode.cpp.s:
	cd /Users/yoshiaki/tmp/tops && $(MAKE) -f src/CMakeFiles/ToPS.dir/build.make src/CMakeFiles/ToPS.dir/__/lang/src/ConditionalProbabilityNode.cpp.s
.PHONY : __/lang/src/ConditionalProbabilityNode.cpp.s

__/lang/src/ConfigurationNode.o: __/lang/src/ConfigurationNode.cpp.o
.PHONY : __/lang/src/ConfigurationNode.o

# target to build an object file
__/lang/src/ConfigurationNode.cpp.o:
	cd /Users/yoshiaki/tmp/tops && $(MAKE) -f src/CMakeFiles/ToPS.dir/build.make src/CMakeFiles/ToPS.dir/__/lang/src/ConfigurationNode.cpp.o
.PHONY : __/lang/src/ConfigurationNode.cpp.o

__/lang/src/ConfigurationNode.i: __/lang/src/ConfigurationNode.cpp.i
.PHONY : __/lang/src/ConfigurationNode.i

# target to preprocess a source file
__/lang/src/ConfigurationNode.cpp.i:
	cd /Users/yoshiaki/tmp/tops && $(MAKE) -f src/CMakeFiles/ToPS.dir/build.make src/CMakeFiles/ToPS.dir/__/lang/src/ConfigurationNode.cpp.i
.PHONY : __/lang/src/ConfigurationNode.cpp.i

__/lang/src/ConfigurationNode.s: __/lang/src/ConfigurationNode.cpp.s
.PHONY : __/lang/src/ConfigurationNode.s

# target to generate assembly for a file
__/lang/src/ConfigurationNode.cpp.s:
	cd /Users/yoshiaki/tmp/tops && $(MAKE) -f src/CMakeFiles/ToPS.dir/build.make src/CMakeFiles/ToPS.dir/__/lang/src/ConfigurationNode.cpp.s
.PHONY : __/lang/src/ConfigurationNode.cpp.s

__/lang/src/FloatNode.o: __/lang/src/FloatNode.cpp.o
.PHONY : __/lang/src/FloatNode.o

# target to build an object file
__/lang/src/FloatNode.cpp.o:
	cd /Users/yoshiaki/tmp/tops && $(MAKE) -f src/CMakeFiles/ToPS.dir/build.make src/CMakeFiles/ToPS.dir/__/lang/src/FloatNode.cpp.o
.PHONY : __/lang/src/FloatNode.cpp.o

__/lang/src/FloatNode.i: __/lang/src/FloatNode.cpp.i
.PHONY : __/lang/src/FloatNode.i

# target to preprocess a source file
__/lang/src/FloatNode.cpp.i:
	cd /Users/yoshiaki/tmp/tops && $(MAKE) -f src/CMakeFiles/ToPS.dir/build.make src/CMakeFiles/ToPS.dir/__/lang/src/FloatNode.cpp.i
.PHONY : __/lang/src/FloatNode.cpp.i

__/lang/src/FloatNode.s: __/lang/src/FloatNode.cpp.s
.PHONY : __/lang/src/FloatNode.s

# target to generate assembly for a file
__/lang/src/FloatNode.cpp.s:
	cd /Users/yoshiaki/tmp/tops && $(MAKE) -f src/CMakeFiles/ToPS.dir/build.make src/CMakeFiles/ToPS.dir/__/lang/src/FloatNode.cpp.s
.PHONY : __/lang/src/FloatNode.cpp.s

__/lang/src/IntegerNode.o: __/lang/src/IntegerNode.cpp.o
.PHONY : __/lang/src/IntegerNode.o

# target to build an object file
__/lang/src/IntegerNode.cpp.o:
	cd /Users/yoshiaki/tmp/tops && $(MAKE) -f src/CMakeFiles/ToPS.dir/build.make src/CMakeFiles/ToPS.dir/__/lang/src/IntegerNode.cpp.o
.PHONY : __/lang/src/IntegerNode.cpp.o

__/lang/src/IntegerNode.i: __/lang/src/IntegerNode.cpp.i
.PHONY : __/lang/src/IntegerNode.i

# target to preprocess a source file
__/lang/src/IntegerNode.cpp.i:
	cd /Users/yoshiaki/tmp/tops && $(MAKE) -f src/CMakeFiles/ToPS.dir/build.make src/CMakeFiles/ToPS.dir/__/lang/src/IntegerNode.cpp.i
.PHONY : __/lang/src/IntegerNode.cpp.i

__/lang/src/IntegerNode.s: __/lang/src/IntegerNode.cpp.s
.PHONY : __/lang/src/IntegerNode.s

# target to generate assembly for a file
__/lang/src/IntegerNode.cpp.s:
	cd /Users/yoshiaki/tmp/tops && $(MAKE) -f src/CMakeFiles/ToPS.dir/build.make src/CMakeFiles/ToPS.dir/__/lang/src/IntegerNode.cpp.s
.PHONY : __/lang/src/IntegerNode.cpp.s

__/lang/src/KeyNode.o: __/lang/src/KeyNode.cpp.o
.PHONY : __/lang/src/KeyNode.o

# target to build an object file
__/lang/src/KeyNode.cpp.o:
	cd /Users/yoshiaki/tmp/tops && $(MAKE) -f src/CMakeFiles/ToPS.dir/build.make src/CMakeFiles/ToPS.dir/__/lang/src/KeyNode.cpp.o
.PHONY : __/lang/src/KeyNode.cpp.o

__/lang/src/KeyNode.i: __/lang/src/KeyNode.cpp.i
.PHONY : __/lang/src/KeyNode.i

# target to preprocess a source file
__/lang/src/KeyNode.cpp.i:
	cd /Users/yoshiaki/tmp/tops && $(MAKE) -f src/CMakeFiles/ToPS.dir/build.make src/CMakeFiles/ToPS.dir/__/lang/src/KeyNode.cpp.i
.PHONY : __/lang/src/KeyNode.cpp.i

__/lang/src/KeyNode.s: __/lang/src/KeyNode.cpp.s
.PHONY : __/lang/src/KeyNode.s

# target to generate assembly for a file
__/lang/src/KeyNode.cpp.s:
	cd /Users/yoshiaki/tmp/tops && $(MAKE) -f src/CMakeFiles/ToPS.dir/build.make src/CMakeFiles/ToPS.dir/__/lang/src/KeyNode.cpp.s
.PHONY : __/lang/src/KeyNode.cpp.s

__/lang/src/ListNode.o: __/lang/src/ListNode.cpp.o
.PHONY : __/lang/src/ListNode.o

# target to build an object file
__/lang/src/ListNode.cpp.o:
	cd /Users/yoshiaki/tmp/tops && $(MAKE) -f src/CMakeFiles/ToPS.dir/build.make src/CMakeFiles/ToPS.dir/__/lang/src/ListNode.cpp.o
.PHONY : __/lang/src/ListNode.cpp.o

__/lang/src/ListNode.i: __/lang/src/ListNode.cpp.i
.PHONY : __/lang/src/ListNode.i

# target to preprocess a source file
__/lang/src/ListNode.cpp.i:
	cd /Users/yoshiaki/tmp/tops && $(MAKE) -f src/CMakeFiles/ToPS.dir/build.make src/CMakeFiles/ToPS.dir/__/lang/src/ListNode.cpp.i
.PHONY : __/lang/src/ListNode.cpp.i

__/lang/src/ListNode.s: __/lang/src/ListNode.cpp.s
.PHONY : __/lang/src/ListNode.s

# target to generate assembly for a file
__/lang/src/ListNode.cpp.s:
	cd /Users/yoshiaki/tmp/tops && $(MAKE) -f src/CMakeFiles/ToPS.dir/build.make src/CMakeFiles/ToPS.dir/__/lang/src/ListNode.cpp.s
.PHONY : __/lang/src/ListNode.cpp.s

__/lang/src/ProbabilityMapNode.o: __/lang/src/ProbabilityMapNode.cpp.o
.PHONY : __/lang/src/ProbabilityMapNode.o

# target to build an object file
__/lang/src/ProbabilityMapNode.cpp.o:
	cd /Users/yoshiaki/tmp/tops && $(MAKE) -f src/CMakeFiles/ToPS.dir/build.make src/CMakeFiles/ToPS.dir/__/lang/src/ProbabilityMapNode.cpp.o
.PHONY : __/lang/src/ProbabilityMapNode.cpp.o

__/lang/src/ProbabilityMapNode.i: __/lang/src/ProbabilityMapNode.cpp.i
.PHONY : __/lang/src/ProbabilityMapNode.i

# target to preprocess a source file
__/lang/src/ProbabilityMapNode.cpp.i:
	cd /Users/yoshiaki/tmp/tops && $(MAKE) -f src/CMakeFiles/ToPS.dir/build.make src/CMakeFiles/ToPS.dir/__/lang/src/ProbabilityMapNode.cpp.i
.PHONY : __/lang/src/ProbabilityMapNode.cpp.i

__/lang/src/ProbabilityMapNode.s: __/lang/src/ProbabilityMapNode.cpp.s
.PHONY : __/lang/src/ProbabilityMapNode.s

# target to generate assembly for a file
__/lang/src/ProbabilityMapNode.cpp.s:
	cd /Users/yoshiaki/tmp/tops && $(MAKE) -f src/CMakeFiles/ToPS.dir/build.make src/CMakeFiles/ToPS.dir/__/lang/src/ProbabilityMapNode.cpp.s
.PHONY : __/lang/src/ProbabilityMapNode.cpp.s

__/lang/src/ProbabilityNode.o: __/lang/src/ProbabilityNode.cpp.o
.PHONY : __/lang/src/ProbabilityNode.o

# target to build an object file
__/lang/src/ProbabilityNode.cpp.o:
	cd /Users/yoshiaki/tmp/tops && $(MAKE) -f src/CMakeFiles/ToPS.dir/build.make src/CMakeFiles/ToPS.dir/__/lang/src/ProbabilityNode.cpp.o
.PHONY : __/lang/src/ProbabilityNode.cpp.o

__/lang/src/ProbabilityNode.i: __/lang/src/ProbabilityNode.cpp.i
.PHONY : __/lang/src/ProbabilityNode.i

# target to preprocess a source file
__/lang/src/ProbabilityNode.cpp.i:
	cd /Users/yoshiaki/tmp/tops && $(MAKE) -f src/CMakeFiles/ToPS.dir/build.make src/CMakeFiles/ToPS.dir/__/lang/src/ProbabilityNode.cpp.i
.PHONY : __/lang/src/ProbabilityNode.cpp.i

__/lang/src/ProbabilityNode.s: __/lang/src/ProbabilityNode.cpp.s
.PHONY : __/lang/src/ProbabilityNode.s

# target to generate assembly for a file
__/lang/src/ProbabilityNode.cpp.s:
	cd /Users/yoshiaki/tmp/tops && $(MAKE) -f src/CMakeFiles/ToPS.dir/build.make src/CMakeFiles/ToPS.dir/__/lang/src/ProbabilityNode.cpp.s
.PHONY : __/lang/src/ProbabilityNode.cpp.s

__/lang/src/PropertyNode.o: __/lang/src/PropertyNode.cpp.o
.PHONY : __/lang/src/PropertyNode.o

# target to build an object file
__/lang/src/PropertyNode.cpp.o:
	cd /Users/yoshiaki/tmp/tops && $(MAKE) -f src/CMakeFiles/ToPS.dir/build.make src/CMakeFiles/ToPS.dir/__/lang/src/PropertyNode.cpp.o
.PHONY : __/lang/src/PropertyNode.cpp.o

__/lang/src/PropertyNode.i: __/lang/src/PropertyNode.cpp.i
.PHONY : __/lang/src/PropertyNode.i

# target to preprocess a source file
__/lang/src/PropertyNode.cpp.i:
	cd /Users/yoshiaki/tmp/tops && $(MAKE) -f src/CMakeFiles/ToPS.dir/build.make src/CMakeFiles/ToPS.dir/__/lang/src/PropertyNode.cpp.i
.PHONY : __/lang/src/PropertyNode.cpp.i

__/lang/src/PropertyNode.s: __/lang/src/PropertyNode.cpp.s
.PHONY : __/lang/src/PropertyNode.s

# target to generate assembly for a file
__/lang/src/PropertyNode.cpp.s:
	cd /Users/yoshiaki/tmp/tops && $(MAKE) -f src/CMakeFiles/ToPS.dir/build.make src/CMakeFiles/ToPS.dir/__/lang/src/PropertyNode.cpp.s
.PHONY : __/lang/src/PropertyNode.cpp.s

__/lang/src/StringNode.o: __/lang/src/StringNode.cpp.o
.PHONY : __/lang/src/StringNode.o

# target to build an object file
__/lang/src/StringNode.cpp.o:
	cd /Users/yoshiaki/tmp/tops && $(MAKE) -f src/CMakeFiles/ToPS.dir/build.make src/CMakeFiles/ToPS.dir/__/lang/src/StringNode.cpp.o
.PHONY : __/lang/src/StringNode.cpp.o

__/lang/src/StringNode.i: __/lang/src/StringNode.cpp.i
.PHONY : __/lang/src/StringNode.i

# target to preprocess a source file
__/lang/src/StringNode.cpp.i:
	cd /Users/yoshiaki/tmp/tops && $(MAKE) -f src/CMakeFiles/ToPS.dir/build.make src/CMakeFiles/ToPS.dir/__/lang/src/StringNode.cpp.i
.PHONY : __/lang/src/StringNode.cpp.i

__/lang/src/StringNode.s: __/lang/src/StringNode.cpp.s
.PHONY : __/lang/src/StringNode.s

# target to generate assembly for a file
__/lang/src/StringNode.cpp.s:
	cd /Users/yoshiaki/tmp/tops && $(MAKE) -f src/CMakeFiles/ToPS.dir/build.make src/CMakeFiles/ToPS.dir/__/lang/src/StringNode.cpp.s
.PHONY : __/lang/src/StringNode.cpp.s

__/lang/src/ToPSLangVisitor.o: __/lang/src/ToPSLangVisitor.cpp.o
.PHONY : __/lang/src/ToPSLangVisitor.o

# target to build an object file
__/lang/src/ToPSLangVisitor.cpp.o:
	cd /Users/yoshiaki/tmp/tops && $(MAKE) -f src/CMakeFiles/ToPS.dir/build.make src/CMakeFiles/ToPS.dir/__/lang/src/ToPSLangVisitor.cpp.o
.PHONY : __/lang/src/ToPSLangVisitor.cpp.o

__/lang/src/ToPSLangVisitor.i: __/lang/src/ToPSLangVisitor.cpp.i
.PHONY : __/lang/src/ToPSLangVisitor.i

# target to preprocess a source file
__/lang/src/ToPSLangVisitor.cpp.i:
	cd /Users/yoshiaki/tmp/tops && $(MAKE) -f src/CMakeFiles/ToPS.dir/build.make src/CMakeFiles/ToPS.dir/__/lang/src/ToPSLangVisitor.cpp.i
.PHONY : __/lang/src/ToPSLangVisitor.cpp.i

__/lang/src/ToPSLangVisitor.s: __/lang/src/ToPSLangVisitor.cpp.s
.PHONY : __/lang/src/ToPSLangVisitor.s

# target to generate assembly for a file
__/lang/src/ToPSLangVisitor.cpp.s:
	cd /Users/yoshiaki/tmp/tops && $(MAKE) -f src/CMakeFiles/ToPS.dir/build.make src/CMakeFiles/ToPS.dir/__/lang/src/ToPSLangVisitor.cpp.s
.PHONY : __/lang/src/ToPSLangVisitor.cpp.s

__/lang/src/ValueNode.o: __/lang/src/ValueNode.cpp.o
.PHONY : __/lang/src/ValueNode.o

# target to build an object file
__/lang/src/ValueNode.cpp.o:
	cd /Users/yoshiaki/tmp/tops && $(MAKE) -f src/CMakeFiles/ToPS.dir/build.make src/CMakeFiles/ToPS.dir/__/lang/src/ValueNode.cpp.o
.PHONY : __/lang/src/ValueNode.cpp.o

__/lang/src/ValueNode.i: __/lang/src/ValueNode.cpp.i
.PHONY : __/lang/src/ValueNode.i

# target to preprocess a source file
__/lang/src/ValueNode.cpp.i:
	cd /Users/yoshiaki/tmp/tops && $(MAKE) -f src/CMakeFiles/ToPS.dir/build.make src/CMakeFiles/ToPS.dir/__/lang/src/ValueNode.cpp.i
.PHONY : __/lang/src/ValueNode.cpp.i

__/lang/src/ValueNode.s: __/lang/src/ValueNode.cpp.s
.PHONY : __/lang/src/ValueNode.s

# target to generate assembly for a file
__/lang/src/ValueNode.cpp.s:
	cd /Users/yoshiaki/tmp/tops && $(MAKE) -f src/CMakeFiles/ToPS.dir/build.make src/CMakeFiles/ToPS.dir/__/lang/src/ValueNode.cpp.s
.PHONY : __/lang/src/ValueNode.cpp.s

__/lang/src/lang.o: __/lang/src/lang.cpp.o
.PHONY : __/lang/src/lang.o

# target to build an object file
__/lang/src/lang.cpp.o:
	cd /Users/yoshiaki/tmp/tops && $(MAKE) -f src/CMakeFiles/ToPS.dir/build.make src/CMakeFiles/ToPS.dir/__/lang/src/lang.cpp.o
.PHONY : __/lang/src/lang.cpp.o

__/lang/src/lang.i: __/lang/src/lang.cpp.i
.PHONY : __/lang/src/lang.i

# target to preprocess a source file
__/lang/src/lang.cpp.i:
	cd /Users/yoshiaki/tmp/tops && $(MAKE) -f src/CMakeFiles/ToPS.dir/build.make src/CMakeFiles/ToPS.dir/__/lang/src/lang.cpp.i
.PHONY : __/lang/src/lang.cpp.i

__/lang/src/lang.s: __/lang/src/lang.cpp.s
.PHONY : __/lang/src/lang.s

# target to generate assembly for a file
__/lang/src/lang.cpp.s:
	cd /Users/yoshiaki/tmp/tops && $(MAKE) -f src/CMakeFiles/ToPS.dir/build.make src/CMakeFiles/ToPS.dir/__/lang/src/lang.cpp.s
.PHONY : __/lang/src/lang.cpp.s

__/lang/src/parser.o: __/lang/src/parser.cpp.o
.PHONY : __/lang/src/parser.o

# target to build an object file
__/lang/src/parser.cpp.o:
	cd /Users/yoshiaki/tmp/tops && $(MAKE) -f src/CMakeFiles/ToPS.dir/build.make src/CMakeFiles/ToPS.dir/__/lang/src/parser.cpp.o
.PHONY : __/lang/src/parser.cpp.o

__/lang/src/parser.i: __/lang/src/parser.cpp.i
.PHONY : __/lang/src/parser.i

# target to preprocess a source file
__/lang/src/parser.cpp.i:
	cd /Users/yoshiaki/tmp/tops && $(MAKE) -f src/CMakeFiles/ToPS.dir/build.make src/CMakeFiles/ToPS.dir/__/lang/src/parser.cpp.i
.PHONY : __/lang/src/parser.cpp.i

__/lang/src/parser.s: __/lang/src/parser.cpp.s
.PHONY : __/lang/src/parser.s

# target to generate assembly for a file
__/lang/src/parser.cpp.s:
	cd /Users/yoshiaki/tmp/tops && $(MAKE) -f src/CMakeFiles/ToPS.dir/build.make src/CMakeFiles/ToPS.dir/__/lang/src/parser.cpp.s
.PHONY : __/lang/src/parser.cpp.s

__/lang/src/tokens.o: __/lang/src/tokens.cpp.o
.PHONY : __/lang/src/tokens.o

# target to build an object file
__/lang/src/tokens.cpp.o:
	cd /Users/yoshiaki/tmp/tops && $(MAKE) -f src/CMakeFiles/ToPS.dir/build.make src/CMakeFiles/ToPS.dir/__/lang/src/tokens.cpp.o
.PHONY : __/lang/src/tokens.cpp.o

__/lang/src/tokens.i: __/lang/src/tokens.cpp.i
.PHONY : __/lang/src/tokens.i

# target to preprocess a source file
__/lang/src/tokens.cpp.i:
	cd /Users/yoshiaki/tmp/tops && $(MAKE) -f src/CMakeFiles/ToPS.dir/build.make src/CMakeFiles/ToPS.dir/__/lang/src/tokens.cpp.i
.PHONY : __/lang/src/tokens.cpp.i

__/lang/src/tokens.s: __/lang/src/tokens.cpp.s
.PHONY : __/lang/src/tokens.s

# target to generate assembly for a file
__/lang/src/tokens.cpp.s:
	cd /Users/yoshiaki/tmp/tops && $(MAKE) -f src/CMakeFiles/ToPS.dir/build.make src/CMakeFiles/ToPS.dir/__/lang/src/tokens.cpp.s
.PHONY : __/lang/src/tokens.cpp.s

util.o: util.cpp.o
.PHONY : util.o

# target to build an object file
util.cpp.o:
	cd /Users/yoshiaki/tmp/tops && $(MAKE) -f src/CMakeFiles/ToPS.dir/build.make src/CMakeFiles/ToPS.dir/util.cpp.o
.PHONY : util.cpp.o

util.i: util.cpp.i
.PHONY : util.i

# target to preprocess a source file
util.cpp.i:
	cd /Users/yoshiaki/tmp/tops && $(MAKE) -f src/CMakeFiles/ToPS.dir/build.make src/CMakeFiles/ToPS.dir/util.cpp.i
.PHONY : util.cpp.i

util.s: util.cpp.s
.PHONY : util.s

# target to generate assembly for a file
util.cpp.s:
	cd /Users/yoshiaki/tmp/tops && $(MAKE) -f src/CMakeFiles/ToPS.dir/build.make src/CMakeFiles/ToPS.dir/util.cpp.s
.PHONY : util.cpp.s

# Help Target
help:
	@echo "The following are some of the valid targets for this Makefile:"
	@echo "... all (the default if no target is provided)"
	@echo "... clean"
	@echo "... depend"
	@echo "... ToPS"
	@echo "... edit_cache"
	@echo "... install"
	@echo "... install/local"
	@echo "... install/strip"
	@echo "... list_install_components"
	@echo "... rebuild_cache"
	@echo "... test"
	@echo "... AkaikeInformationCriteria.o"
	@echo "... AkaikeInformationCriteria.i"
	@echo "... AkaikeInformationCriteria.s"
	@echo "... Alphabet.o"
	@echo "... Alphabet.i"
	@echo "... Alphabet.s"
	@echo "... BayesianInformationCriteria.o"
	@echo "... BayesianInformationCriteria.i"
	@echo "... BayesianInformationCriteria.s"
	@echo "... BernoulliModelCreator.o"
	@echo "... BernoulliModelCreator.i"
	@echo "... BernoulliModelCreator.s"
	@echo "... ConfigurationReader.o"
	@echo "... ConfigurationReader.i"
	@echo "... ConfigurationReader.s"
	@echo "... ContextTree.o"
	@echo "... ContextTree.i"
	@echo "... ContextTree.s"
	@echo "... DecodableModel.o"
	@echo "... DecodableModel.i"
	@echo "... DecodableModel.s"
	@echo "... DiscreteIIDModel.o"
	@echo "... DiscreteIIDModel.i"
	@echo "... DiscreteIIDModel.s"
	@echo "... DiscreteIIDModelCreator.o"
	@echo "... DiscreteIIDModelCreator.i"
	@echo "... DiscreteIIDModelCreator.s"
	@echo "... FactorableModel.o"
	@echo "... FactorableModel.i"
	@echo "... FactorableModel.s"
	@echo "... FixedSequenceAtPosition.o"
	@echo "... FixedSequenceAtPosition.i"
	@echo "... FixedSequenceAtPosition.s"
	@echo "... FixedSequenceAtPositionCreator.o"
	@echo "... FixedSequenceAtPositionCreator.i"
	@echo "... FixedSequenceAtPositionCreator.s"
	@echo "... GHMMStates.o"
	@echo "... GHMMStates.i"
	@echo "... GHMMStates.s"
	@echo "... GeneralizedHiddenMarkovModel.o"
	@echo "... GeneralizedHiddenMarkovModel.i"
	@echo "... GeneralizedHiddenMarkovModel.s"
	@echo "... GeneralizedHiddenMarkovModelCreator.o"
	@echo "... GeneralizedHiddenMarkovModelCreator.i"
	@echo "... GeneralizedHiddenMarkovModelCreator.s"
	@echo "... HiddenMarkovModel.o"
	@echo "... HiddenMarkovModel.i"
	@echo "... HiddenMarkovModel.s"
	@echo "... HiddenMarkovModelCreator.o"
	@echo "... HiddenMarkovModelCreator.i"
	@echo "... HiddenMarkovModelCreator.s"
	@echo "... InhomogeneousFactorableModel.o"
	@echo "... InhomogeneousFactorableModel.i"
	@echo "... InhomogeneousFactorableModel.s"
	@echo "... InhomogeneousMarkovChain.o"
	@echo "... InhomogeneousMarkovChain.i"
	@echo "... InhomogeneousMarkovChain.s"
	@echo "... InhomogeneousMarkovChainCreator.o"
	@echo "... InhomogeneousMarkovChainCreator.i"
	@echo "... InhomogeneousMarkovChainCreator.s"
	@echo "... MaximumDependenceDecomposition.o"
	@echo "... MaximumDependenceDecomposition.i"
	@echo "... MaximumDependenceDecomposition.s"
	@echo "... MultipleAlignment.o"
	@echo "... MultipleAlignment.i"
	@echo "... MultipleAlignment.s"
	@echo "... MultipleSequentialModel.o"
	@echo "... MultipleSequentialModel.i"
	@echo "... MultipleSequentialModel.s"
	@echo "... MultipleSequentialModelCreator.o"
	@echo "... MultipleSequentialModelCreator.i"
	@echo "... MultipleSequentialModelCreator.s"
	@echo "... PairHiddenMarkovModel.o"
	@echo "... PairHiddenMarkovModel.i"
	@echo "... PairHiddenMarkovModel.s"
	@echo "... PairHiddenMarkovModelCreator.o"
	@echo "... PairHiddenMarkovModelCreator.i"
	@echo "... PairHiddenMarkovModelCreator.s"
	@echo "... PhasedRunLengthDistribution.o"
	@echo "... PhasedRunLengthDistribution.i"
	@echo "... PhasedRunLengthDistribution.s"
	@echo "... PhasedRunLengthDistributionCreator.o"
	@echo "... PhasedRunLengthDistributionCreator.i"
	@echo "... PhasedRunLengthDistributionCreator.s"
	@echo "... ProbabilisticModelConfiguration.o"
	@echo "... ProbabilisticModelConfiguration.i"
	@echo "... ProbabilisticModelConfiguration.s"
	@echo "... ProbabilisticModelCreatorClient.o"
	@echo "... ProbabilisticModelCreatorClient.i"
	@echo "... ProbabilisticModelCreatorClient.s"
	@echo "... ProbabilisticModelParameter.o"
	@echo "... ProbabilisticModelParameter.i"
	@echo "... ProbabilisticModelParameter.s"
	@echo "... ProbabilisticModelParameterValue2.o"
	@echo "... ProbabilisticModelParameterValue2.i"
	@echo "... ProbabilisticModelParameterValue2.s"
	@echo "... ProfileHiddenMarkovModel.o"
	@echo "... ProfileHiddenMarkovModel.i"
	@echo "... ProfileHiddenMarkovModel.s"
	@echo "... ProfileHiddenMarkovModelCreator.o"
	@echo "... ProfileHiddenMarkovModelCreator.i"
	@echo "... ProfileHiddenMarkovModelCreator.s"
	@echo "... RemoveSequenceFromModel.o"
	@echo "... RemoveSequenceFromModel.i"
	@echo "... RemoveSequenceFromModel.s"
	@echo "... ReverseComplementDNA.o"
	@echo "... ReverseComplementDNA.i"
	@echo "... ReverseComplementDNA.s"
	@echo "... ReverseComplementDNACreator.o"
	@echo "... ReverseComplementDNACreator.i"
	@echo "... ReverseComplementDNACreator.s"
	@echo "... SequenceEntry.o"
	@echo "... SequenceEntry.i"
	@echo "... SequenceEntry.s"
	@echo "... SequenceFactory.o"
	@echo "... SequenceFactory.i"
	@echo "... SequenceFactory.s"
	@echo "... SequenceFormat.o"
	@echo "... SequenceFormat.i"
	@echo "... SequenceFormat.s"
	@echo "... SimilarityBasedSequenceWeighting.o"
	@echo "... SimilarityBasedSequenceWeighting.i"
	@echo "... SimilarityBasedSequenceWeighting.s"
	@echo "... SimilarityBasedSequenceWeightingCreator.o"
	@echo "... SimilarityBasedSequenceWeightingCreator.i"
	@echo "... SimilarityBasedSequenceWeightingCreator.s"
	@echo "... SmoothedHistogramBurge.o"
	@echo "... SmoothedHistogramBurge.i"
	@echo "... SmoothedHistogramBurge.s"
	@echo "... SmoothedHistogramKernelDensity.o"
	@echo "... SmoothedHistogramKernelDensity.i"
	@echo "... SmoothedHistogramKernelDensity.s"
	@echo "... SmoothedHistogramStanke.o"
	@echo "... SmoothedHistogramStanke.i"
	@echo "... SmoothedHistogramStanke.s"
	@echo "... SparseMatrix.o"
	@echo "... SparseMatrix.i"
	@echo "... SparseMatrix.s"
	@echo "... StoreLoadedModel.o"
	@echo "... StoreLoadedModel.i"
	@echo "... StoreLoadedModel.s"
	@echo "... Symbol.o"
	@echo "... Symbol.i"
	@echo "... Symbol.s"
	@echo "... TargetModel.o"
	@echo "... TargetModel.i"
	@echo "... TargetModel.s"
	@echo "... TargetModelCreator.o"
	@echo "... TargetModelCreator.i"
	@echo "... TargetModelCreator.s"
	@echo "... TrainDiscreteIIDModel.o"
	@echo "... TrainDiscreteIIDModel.i"
	@echo "... TrainDiscreteIIDModel.s"
	@echo "... TrainFixedLengthMarkovChain.o"
	@echo "... TrainFixedLengthMarkovChain.i"
	@echo "... TrainFixedLengthMarkovChain.s"
	@echo "... TrainGHMMTransitions.o"
	@echo "... TrainGHMMTransitions.i"
	@echo "... TrainGHMMTransitions.s"
	@echo "... TrainHMMBaumWelch.o"
	@echo "... TrainHMMBaumWelch.i"
	@echo "... TrainHMMBaumWelch.s"
	@echo "... TrainHMMMaximumLikelihood.o"
	@echo "... TrainHMMMaximumLikelihood.i"
	@echo "... TrainHMMMaximumLikelihood.s"
	@echo "... TrainInterpolatedMarkovChain.o"
	@echo "... TrainInterpolatedMarkovChain.i"
	@echo "... TrainInterpolatedMarkovChain.s"
	@echo "... TrainInterpolatedPhasedMarkovChain.o"
	@echo "... TrainInterpolatedPhasedMarkovChain.i"
	@echo "... TrainInterpolatedPhasedMarkovChain.s"
	@echo "... TrainPHMMBaumWelch.o"
	@echo "... TrainPHMMBaumWelch.i"
	@echo "... TrainPHMMBaumWelch.s"
	@echo "... TrainPhasedMarkovChain.o"
	@echo "... TrainPhasedMarkovChain.i"
	@echo "... TrainPhasedMarkovChain.s"
	@echo "... TrainPhasedMarkovChainContextAlgorithm.o"
	@echo "... TrainPhasedMarkovChainContextAlgorithm.i"
	@echo "... TrainPhasedMarkovChainContextAlgorithm.s"
	@echo "... TrainProfileHMMBaumWelch.o"
	@echo "... TrainProfileHMMBaumWelch.i"
	@echo "... TrainProfileHMMBaumWelch.s"
	@echo "... TrainProfileHMMMaxLikelihood.o"
	@echo "... TrainProfileHMMMaxLikelihood.i"
	@echo "... TrainProfileHMMMaxLikelihood.s"
	@echo "... TrainSimilarityBasedSequenceWeighting.o"
	@echo "... TrainSimilarityBasedSequenceWeighting.i"
	@echo "... TrainSimilarityBasedSequenceWeighting.s"
	@echo "... TrainVariableLengthInhomogeneousMarkovChain.o"
	@echo "... TrainVariableLengthInhomogeneousMarkovChain.i"
	@echo "... TrainVariableLengthInhomogeneousMarkovChain.s"
	@echo "... TrainVariableLengthMarkovChain.o"
	@echo "... TrainVariableLengthMarkovChain.i"
	@echo "... TrainVariableLengthMarkovChain.s"
	@echo "... TrainWeightArrayModel.o"
	@echo "... TrainWeightArrayModel.i"
	@echo "... TrainWeightArrayModel.s"
	@echo "... VariableLengthMarkovChain.o"
	@echo "... VariableLengthMarkovChain.i"
	@echo "... VariableLengthMarkovChain.s"
	@echo "... VariableLengthMarkovChainCreator.o"
	@echo "... VariableLengthMarkovChainCreator.i"
	@echo "... VariableLengthMarkovChainCreator.s"
	@echo "... __/lang/src/ASTNode.o"
	@echo "... __/lang/src/ASTNode.i"
	@echo "... __/lang/src/ASTNode.s"
	@echo "... __/lang/src/ConditionNode.o"
	@echo "... __/lang/src/ConditionNode.i"
	@echo "... __/lang/src/ConditionNode.s"
	@echo "... __/lang/src/ConditionalProbabilityMapNode.o"
	@echo "... __/lang/src/ConditionalProbabilityMapNode.i"
	@echo "... __/lang/src/ConditionalProbabilityMapNode.s"
	@echo "... __/lang/src/ConditionalProbabilityNode.o"
	@echo "... __/lang/src/ConditionalProbabilityNode.i"
	@echo "... __/lang/src/ConditionalProbabilityNode.s"
	@echo "... __/lang/src/ConfigurationNode.o"
	@echo "... __/lang/src/ConfigurationNode.i"
	@echo "... __/lang/src/ConfigurationNode.s"
	@echo "... __/lang/src/FloatNode.o"
	@echo "... __/lang/src/FloatNode.i"
	@echo "... __/lang/src/FloatNode.s"
	@echo "... __/lang/src/IntegerNode.o"
	@echo "... __/lang/src/IntegerNode.i"
	@echo "... __/lang/src/IntegerNode.s"
	@echo "... __/lang/src/KeyNode.o"
	@echo "... __/lang/src/KeyNode.i"
	@echo "... __/lang/src/KeyNode.s"
	@echo "... __/lang/src/ListNode.o"
	@echo "... __/lang/src/ListNode.i"
	@echo "... __/lang/src/ListNode.s"
	@echo "... __/lang/src/ProbabilityMapNode.o"
	@echo "... __/lang/src/ProbabilityMapNode.i"
	@echo "... __/lang/src/ProbabilityMapNode.s"
	@echo "... __/lang/src/ProbabilityNode.o"
	@echo "... __/lang/src/ProbabilityNode.i"
	@echo "... __/lang/src/ProbabilityNode.s"
	@echo "... __/lang/src/PropertyNode.o"
	@echo "... __/lang/src/PropertyNode.i"
	@echo "... __/lang/src/PropertyNode.s"
	@echo "... __/lang/src/StringNode.o"
	@echo "... __/lang/src/StringNode.i"
	@echo "... __/lang/src/StringNode.s"
	@echo "... __/lang/src/ToPSLangVisitor.o"
	@echo "... __/lang/src/ToPSLangVisitor.i"
	@echo "... __/lang/src/ToPSLangVisitor.s"
	@echo "... __/lang/src/ValueNode.o"
	@echo "... __/lang/src/ValueNode.i"
	@echo "... __/lang/src/ValueNode.s"
	@echo "... __/lang/src/lang.o"
	@echo "... __/lang/src/lang.i"
	@echo "... __/lang/src/lang.s"
	@echo "... __/lang/src/parser.o"
	@echo "... __/lang/src/parser.i"
	@echo "... __/lang/src/parser.s"
	@echo "... __/lang/src/tokens.o"
	@echo "... __/lang/src/tokens.i"
	@echo "... __/lang/src/tokens.s"
	@echo "... util.o"
	@echo "... util.i"
	@echo "... util.s"
.PHONY : help


#=============================================================================
# Special targets to cleanup operation of make.

# Special rule to run CMake to check the build system integrity.
# No rule that depends on this can have commands that come from listfiles
# because they might be regenerated.
cmake_check_build_system:
	cd /Users/yoshiaki/tmp/tops && $(CMAKE_COMMAND) -H$(CMAKE_SOURCE_DIR) -B$(CMAKE_BINARY_DIR) --check-build-system CMakeFiles/Makefile.cmake 0
.PHONY : cmake_check_build_system
