# Supplementary material for: ToPS: A Framework to Manipulate Probabilistic Models of Sequence Data
Source: PLoS Comput Biol. 2013 Oct 3;9(10):e1003234. doi: 10.1371/journal.pcbi.1003234 (PMC3789777; doi:10.1371/journal.pcbi.1003234)
Supplement: Software S1 — Source code for ToPS. A compressed file containing the source code for ToPS. (GZ) [file pcbi.1003234.s001.gz › tops/src/ProbabilisticModelConfiguration.cpp]

#include "ProbabilisticModelConfiguration.hpp"

namespace tops {
  std::string ProbabilisticModelConfiguration::parameterType() {
    return "ProbabilisticModelConfiguration";
  }
}
