# Supplementary material for: ToPS: A Framework to Manipulate Probabilistic Models of Sequence Data
Source: PLoS Comput Biol. 2013 Oct 3;9(10):e1003234. doi: 10.1371/journal.pcbi.1003234 (PMC3789777; doi:10.1371/journal.pcbi.1003234)
Supplement: Software S1 — Source code for ToPS. A compressed file containing the source code for ToPS. (GZ) [file pcbi.1003234.s001.gz › tops/src/ProbabilisticModelConfiguration.hpp]

#ifndef PROBABILISTIC_MODEL_CONFIGURATION_HPP
#define PROBABILISTIC_MODEL_CONFIGURATION_HPP

#include <string>
#include <map>

#include "ProbabilisticModelParameterValue2.hpp"

namespace tops {

  class ProbabilisticModelConfiguration: public ProbabilisticModelParameterValue2 {
  public:
    ProbabilisticModelConfiguration(ProbabilisticModelParameterMap parameters):_parameters(parameters) {}

    virtual std::string parameterType();
  private:
    ProbabilisticModelParameterMap _parameters;
  };

  typedef boost::shared_ptr <ProbabilisticModelConfiguration> ProbabilisticModelConfigurationPtr;

}

#endif
