# Supplementary material for: ToPS: A Framework to Manipulate Probabilistic Models of Sequence Data
Source: PLoS Comput Biol. 2013 Oct 3;9(10):e1003234. doi: 10.1371/journal.pcbi.1003234 (PMC3789777; doi:10.1371/journal.pcbi.1003234)
Supplement: Software S1 — Source code for ToPS. A compressed file containing the source code for ToPS. (GZ) [file pcbi.1003234.s001.gz › tops/src/ProbabilisticModelDecorator.hpp]

/*
 *       ProbabilisticModelDecorator.hpp
 *
 *       Copyright 2011 Andre Yoshiaki Kashiwabara <akashiwabara@usp.br>
 *                      �gor Bonadio <ibonadio@ime.usp.br>
 *                      Vitor Onuchic <vitoronuchic@gmail.com>
 *                      Alan Mitchell Durham <aland@usp.br>
 *
 *       This program is free software; you can redistribute it and/or modify
 *       it under the terms of the GNU  General Public License as published by
 *       the Free Software Foundation; either version 3 of the License, or
 *       (at your option) any later version.
 *
 *       This program is distributed in the hope that it will be useful,
 *       but WITHOUT ANY WARRANTY; without even the implied warranty of
 *       MERCHANTABILITY or FITNESS FOR A PARTICULAR PURPOSE.  See the
 *       GNU General Public License for more details.
 *
 *       You should have received a copy of the GNU General Public License
 *       along with this program; if not, write to the Free Software
 *       Foundation, Inc., 51 Franklin Street, Fifth Floor, Boston,
 *       MA 02110-1301, USA.
 */

#include "crossplatform.hpp"

#include "ProbabilisticModel.hpp"
#include <string>
namespace tops {
  //! Decorator for the probabilistic model
  class DLLEXPORT ProbabilisticModelDecorator : public ProbabilisticModel {
  private:
    ProbabilisticModelPtr _model;
    std::string _submodelname;
  public:
    ProbabilisticModelDecorator(ProbabilisticModelPtr m) :_model(m){};
    virtual ~ProbabilisticModelDecorator() {};
    //! Calculates the sequence likelihood given this model
    virtual double evaluate(const Sequence & s, unsigned int begin, unsigned int end) const {
      double result;
      result = _model->evaluate(s,begin,end);
      return result;
    }

    virtual double  log_probability_of(int s) const{
      double result ;
      result = _model->log_probability_of(s);
      return result;
    }
    //! Choose a symbol
    virtual double choose() const {
      double result;
      result = _model->choose();
      return result;
    }

    virtual Sequence & choose(Sequence & h, int size) const {
      _model->choose(h,size);
      return h;
    }

    virtual Sequence & choose(Sequence &h, int initial_phase, int size) const{
      _model->choose(h,initial_phase, size);
      return h;
    }

    virtual Sequence & choose(Sequence & h, Sequence & path,  int size) const
    {
      _model->choose(h,path, size);
      return h;
    }


    virtual Sequence & choose(Sequence & h, Sequence & path,  int i, int size) const
    {
      _model->choose(h, path, i, size);
      return h;
    }

    virtual Sequence & chooseWithHistory(Sequence & h, int i,  int size) const
    {
      _model-> chooseWithHistory(h,i,size);
      return h;
    }

    virtual Sequence & chooseWithHistory(Sequence & h, int i,  int phase, int size) const{
      _model->chooseWithHistory(h, i, phase,  size);
      return h;
    }

    virtual double prefix_sum_array_compute(int begin , int end) {
      return _model->prefix_sum_array_compute(begin,end);
    }

    virtual double prefix_sum_array_compute(int begin , int end, int phase) {
      return _model->prefix_sum_array_compute(begin,end,phase);
    }

    virtual bool initialize_prefix_sum_array(const Sequence & s, int phase) {
      return initialize_prefix_sum_array(s);
    }
    virtual bool initialize_prefix_sum_array(const Sequence & s) {
      return _model->initialize_prefix_sum_array(s);
    }
    virtual ProbabilisticModelPtr subModel() const {
      return _model;
    }
    virtual void setSubModel(ProbabilisticModelPtr model) {
      _model =model;
    }
    virtual void  subModelName(std::string name) {
      _submodelname = name;
    }
    virtual std::string subModelName() const{
      return _submodelname;
    }

  };
  typedef boost::shared_ptr<ProbabilisticModelDecorator> ProbabilisticModelDecoratorPtr;
}
