# Supplementary material for: ToPS: A Framework to Manipulate Probabilistic Models of Sequence Data
Source: PLoS Comput Biol. 2013 Oct 3;9(10):e1003234. doi: 10.1371/journal.pcbi.1003234 (PMC3789777; doi:10.1371/journal.pcbi.1003234)
Supplement: Software S1 — Source code for ToPS. A compressed file containing the source code for ToPS. (GZ) [file pcbi.1003234.s001.gz › tops/src/ProbabilisticModelParameter.hpp]

/*
 *       ProbabilisticModelParameter.hpp
 *
 *       Copyright 2011 Andre Yoshiaki Kashiwabara <akashiwabara@usp.br>
 *                      �gor Bonadio <ibonadio@ime.usp.br>
 *                      Vitor Onuchic <vitoronuchic@gmail.com>
 *                      Alan Mitchell Durham <aland@usp.br>
 *
 *       This program is free software; you can redistribute it and/or modify
 *       it under the terms of the GNU  General Public License as published by
 *       the Free Software Foundation; either version 3 of the License, or
 *       (at your option) any later version.
 *
 *       This program is distributed in the hope that it will be useful,
 *       but WITHOUT ANY WARRANTY; without even the implied warranty of
 *       MERCHANTABILITY or FITNESS FOR A PARTICULAR PURPOSE.  See the
 *       GNU General Public License for more details.
 *
 *       You should have received a copy of the GNU General Public License
 *       along with this program; if not, write to the Free Software
 *       Foundation, Inc., 51 Franklin Street, Fifth Floor, Boston,
 *       MA 02110-1301, USA.
 */

#ifndef CONFIGURATION_PARAMETER_VALUE_HPP
#define CONFIGURATION_PARAMETER_VALUE_HPP

#include "crossplatform.hpp"

#include <boost/numeric/ublas/vector.hpp>
#include <boost/numeric/ublas/matrix.hpp>

#include <boost/shared_ptr.hpp>
#include <map>
#include <vector>
#include <iostream>

#include "SequenceEntry.hpp"
#include "Sequence.hpp"

namespace tops {

  typedef std::vector <double> DoubleVector;
  typedef std::vector <int> IntVector;
  typedef boost::numeric::ublas::matrix<double> Matrix;
  typedef std::vector <std::string> StringVector;
  typedef std::map <std::string, std::string> StringMap;
  class DLLEXPORT ProbabilisticModelParameterValue;
  typedef boost::shared_ptr <ProbabilisticModelParameterValue> ProbabilisticModelParameterValuePtr;
  //! This class registers a set of parameters
  class DLLEXPORT ProbabilisticModelParameters  {
    std::map <std::string, ProbabilisticModelParameterValuePtr> _parameters;
  public:
    ProbabilisticModelParameters(){}
    void add(const char * name, ProbabilisticModelParameterValuePtr value);

    //! Adds a new model parameter
    void add(std::string name, ProbabilisticModelParameterValuePtr value);

    //! set a model parameter
    void set(std::string name, ProbabilisticModelParameterValuePtr value);

    //! Get a mandatory parameter
    ProbabilisticModelParameterValuePtr getMandatoryParameterValue(const std::string & name) const;

    //! Get a optional parameter
    ProbabilisticModelParameterValuePtr getOptionalParameterValue(const std::string & name) const;

    std::map <std::string, ProbabilisticModelParameterValuePtr>  parameters() const;

  };


  //! Represents a parameter value
  class DLLEXPORT ProbabilisticModelParameterValue {
  private:
    StringVector s;
    DoubleVector d;
    IntVector i;
    std::vector <DoubleVector> m;
    std::map<std::string,double> p;
    std::map<std::string,std::string> str_map;
    std::string _str;
    ProbabilisticModelParameters  _parameters;
  public:
    virtual void setIsRoot(bool root);
    ProbabilisticModelParameterValue(){}
    virtual    ~ProbabilisticModelParameterValue() {}
    virtual std::string parameter_type () const;
    virtual std::map<std::string,double> & getDoubleMap();
    virtual StringVector & getStringVector();
    virtual DoubleVector & getDoubleVector();
    virtual IntVector & getIntVector();
    virtual ProbabilisticModelParameters & getParameters();
    virtual std::string getString() const;
    virtual std::map<std::string,std::string> &  getStringMap();
    virtual int getInt() const;
    virtual double getDouble()  const;
    virtual std::string str() const;
  };

  class DLLEXPORT ProbabilisticModelParameterListValue : public ProbabilisticModelParameterValue {
  public:
    ProbabilisticModelParameterListValue(){_root = false;}
    ProbabilisticModelParameterListValue ( ProbabilisticModelParameters p) : _parameters(p) {
      _root =false;
    };
    virtual void initialize(ProbabilisticModelParameters p);
    virtual ProbabilisticModelParameters & getParameters() ;
    virtual std::string parameter_type () const;
    virtual void setIsRoot(bool root);
    virtual std::string getString() const;
    virtual std::string str () const;
  private:
    ProbabilisticModelParameters  _parameters;
    bool _root;
  };
  typedef boost::shared_ptr<ProbabilisticModelParameterListValue> ProbabilisticModelParameterListValuePtr;

  //! Double parameter value
  class DLLEXPORT DoubleParameterValue: public ProbabilisticModelParameterValue {
  private:
    double _d;
  public:
    DoubleParameterValue(){}
    virtual void initialize(double d);
    DoubleParameterValue(double d) {
      _d = d;
    }
    virtual std::string parameter_type () const;
    virtual ~DoubleParameterValue(){}
    virtual double getDouble() const;
    virtual int getInt() const;
    virtual std::string str() const;
  };

  //! Integer parameter value
  class DLLEXPORT IntParameterValue: public ProbabilisticModelParameterValue {
  private:
    int _v;
  public:
    IntParameterValue() {};
    virtual std::string parameter_type () const;
    IntParameterValue(int v){ _v = v;}
    virtual void initialize(int v);
    virtual ~IntParameterValue() {}
    virtual int getInt() const;
    virtual double getDouble() const;
    virtual std::string str() const ;
  };

  //! String parameter value
  class DLLEXPORT StringParameterValue: public ProbabilisticModelParameterValue {
  private:
    std::string _v;
  public:
    StringParameterValue() {}
    StringParameterValue(std::string  v) {
      _v = v;
    }
    virtual std::string parameter_type () const;
    virtual void initialize(std::string v);
    virtual ~StringParameterValue(){}
    virtual std::string getString() const;
    virtual std::string str() const ;
  };

  //! integer vector parameter value
  class DLLEXPORT IntVectorParameterValue: public ProbabilisticModelParameterValue {
  private:
    IntVector _v;
  public:
    IntVectorParameterValue() {}
    virtual std::string parameter_type () const;
    virtual void initialize(IntVector v);
    IntVectorParameterValue(IntVector v) ;
    virtual ~IntVectorParameterValue(){}
    virtual IntVector & getIntVector()  ;
    virtual std::string str() const;
  };
  //! probability table
  class DLLEXPORT DoubleMapParameterValue: public ProbabilisticModelParameterValue {
  private:
    std::map <std::string,double> _v;
  public:
    DoubleMapParameterValue() {
    }
    DoubleMapParameterValue(const std::map<std::string, double> & values) {
      _v = values;
    }
    virtual void initialize(const std::map<std::string, double > & values);
    virtual std::string parameter_type () const;
    DoubleMapParameterValue(std::vector<std::string> keys, std::vector<double> value) {
      for(int i = 0; i < (int)value.size(); i++)
        _v[keys[i]] = value[i];
    }
    virtual ~DoubleMapParameterValue(){}
    virtual std::map<std::string, double> & getDoubleMap() ;
    virtual std::string str() const;

  };
  //! double vector parameter value
  class DLLEXPORT DoubleVectorParameterValue: public ProbabilisticModelParameterValue {
  private:
    DoubleVector _v;
  public:
    DoubleVectorParameterValue() {
    }
    DoubleVectorParameterValue(DoubleVector v) {
      _v = v;
    }
    virtual void initialize(DoubleVector v);
    ~DoubleVectorParameterValue(){}
    virtual DoubleVector & getDoubleVector() ;
    virtual std::string parameter_type () const ;
    virtual std::string str() const ;

  };

  //! string vector parameter value
  class DLLEXPORT StringMapParameterValue: public ProbabilisticModelParameterValue {
  private:
    std::map<std::string,std::string> _str_map;
  public:

    StringMapParameterValue(std::vector<std::string> keys,std::vector<std::string> values)
    {
      for(int i = 0; (i  < (int)keys.size()) && (i < (int)values.size()); i++)
        _str_map[keys[i]] = values[i];
    }
    StringMapParameterValue(std::map<std::string,std::string> m)
    {
      _str_map = m;
    }
    virtual void initialize(std::map<std::string,std::string> m) ;
    StringMapParameterValue() {
    }
    ~StringMapParameterValue(){}
    virtual StringMap & getStringMap();
    virtual std::string parameter_type () const;
    virtual std::string str() const;
  };

  //! string vector parameter value
  class DLLEXPORT StringVectorParameterValue: public ProbabilisticModelParameterValue {
  private:
    StringVector _v;
  public:
    StringVectorParameterValue(){}
    StringVectorParameterValue(StringVector v) {
      _v = v;
    }
    ~StringVectorParameterValue(){}
    virtual StringVector &  getStringVector() ;
    virtual void initialize(StringVector v);
    virtual std::string parameter_type () const ;
    virtual std::string str() const;
  };


  typedef boost::shared_ptr <IntParameterValue> IntParameterValuePtr;
  typedef boost::shared_ptr <DoubleParameterValue> DoubleParameterValuePtr;
  typedef boost::shared_ptr <StringParameterValue> StringParameterValuePtr;
  typedef boost::shared_ptr <StringMapParameterValue> StringMapParameterValuePtr;

  typedef boost::shared_ptr <IntVectorParameterValue> IntVectorParameterValuePtr;
  typedef boost::shared_ptr <DoubleVectorParameterValue> DoubleVectorParameterValuePtr;
  typedef boost::shared_ptr <StringVectorParameterValue> StringVectorParameterValuePtr;
  typedef boost::shared_ptr <DoubleMapParameterValue> DoubleMapParameterValuePtr;
}


#endif
