# Supplementary material for: ToPS: A Framework to Manipulate Probabilistic Models of Sequence Data
Source: PLoS Comput Biol. 2013 Oct 3;9(10):e1003234. doi: 10.1371/journal.pcbi.1003234 (PMC3789777; doi:10.1371/journal.pcbi.1003234)
Supplement: Software S1 — Source code for ToPS. A compressed file containing the source code for ToPS. (GZ) [file pcbi.1003234.s001.gz › tops/src/ProfileHiddenMarkovModel.cpp]

/*
 *       ProfileHiddenMarkovModel.cpp
 *
 *      Copyright 2011  Vitor Onuchic <vitoronuchic@gmail.com>
 *                      Andre Yoshiaki Kashiwabara <akashiwabara@usp.br>
 *                      �gor Bon�dio <ibonadio@ime.usp.br>
 *                      Alan Mitchell Durham <aland@usp.br>
 *                      Felipe Amado <amadofelipe@gmail.com>
 *
 *       This program is free software; you can redistribute it and/or modify
 *       it under the terms of the GNU  General Public License as published by
 *       the Free Software Foundation; either version 3 of the License, or
 *       (at your option) any later version.
 *
 *       This program is distributed in the hope that it will be useful,
 *       but WITHOUT ANY WARRANTY; without even the implied warranty of
 *       MERCHANTABILITY or FITNESS FOR A PARTICULAR PURPOSE.  See the
 *       GNU General Public License for more details.
 *
 *       You should have received a copy of the GNU General Public License
 *       along with this program; if not, write to the Free Software
 *       Foundation, Inc., 51 Franklin Street, Fifth Floor, Boston,
 *       MA 02110-1301, USA.
 */

#include <boost/numeric/ublas/matrix.hpp>
#include "Alphabet.hpp"
#include "ProfileHiddenMarkovModel.hpp"
#include "ProbabilisticModelParameter.hpp"
#include "Symbol.hpp"
#include <iostream>
#include <cmath>
#include <cfloat>
#include <sstream>
#include <vector>
#include <iterator>
#include <stdio.h>

namespace tops {

////////////////////////////////////////////////
////// Model Decoding///////////////////////////
////////////////////////////////////////////////
double ProfileHiddenMarkovModel::forward(const Sequence & s, Matrix &alpha) const {
	//not_implemented("forward(const Sequence & s, Matrix &alpha)");
	return forward(s, alpha, alpha, alpha);
}

double ProfileHiddenMarkovModel::forward(const Sequence & s, Matrix &alpha, Matrix &beta, Matrix &gamma) const {
	int st;
	int n_states = _states.size();
	int n_match_states = (n_states + 3) / 3;
	for (st = 0; st < n_states && !getState(st)->emission(); ++st)
		;
	if (st == n_states) {
		cout << "ERROR: There is only silent states." << endl;
		exit(-1);
	}
	int seq_len = s.size() + 1;

	Matrix mat(n_states, seq_len);
	Matrix ins(n_states, seq_len);
	Matrix del(n_states, seq_len);

	for (int j = 0; j < n_match_states; j++) {
		for (int i = 0; i < seq_len; i++) {
			mat(j, i) = -HUGE;
			ins(j, i) = -HUGE;
			del(j, i) = -HUGE;
		}
	}

	mat(0, 0) = 0;
	int j = 0;
	for (int i = 1; i < seq_len; i++) {

		if (i == 1) {
			ins(j, i) = _states[getStateIndex('I', j)]->emission()->log_probability_of(s[i - 1])
					+ _states[getStateIndex('M', j)]->transitions()->log_probability_of(getStateIndex('I', j)) + mat(j, i - 1);
		} else {

			ins(j, i) = _states[getStateIndex('I', j)]->emission()->log_probability_of(s[i - 1])
					+ log_sum(_states[getStateIndex('M', j)]->transitions()->log_probability_of(getStateIndex('I', j)) + mat(j, i - 1),
							_states[getStateIndex('I', j)]->transitions()->log_probability_of(getStateIndex('I', j)) + ins(j, i - 1));
		}
	}

	j = 1;
	for (int i = 1; i < seq_len; i++) {

		mat(j, i) = _states[getStateIndex('M', j)]->emission()->log_probability_of(s[i - 1])
				+ log_sum(_states[getStateIndex('M', j - 1)]->transitions()->log_probability_of(getStateIndex('M', j)) + mat(j - 1, i - 1),
						_states[getStateIndex('I', j - 1)]->transitions()->log_probability_of(getStateIndex('M', j)) + ins(j - 1, i - 1));

		del(j, i) = log_sum(_states[getStateIndex('M', j - 1)]->transitions()->log_probability_of(getStateIndex('D', j)) + mat(j - 1, i),
				_states[getStateIndex('I', j - 1)]->transitions()->log_probability_of(getStateIndex('D', j)) + ins(j - 1, i));

		ins(j, i) = _states[getStateIndex('I', j)]->emission()->log_probability_of(s[i - 1])
				+ log_sum(_states[getStateIndex('M', j)]->transitions()->log_probability_of(getStateIndex('I', j)) + mat(j, i - 1),
						log_sum(_states[getStateIndex('I', j)]->transitions()->log_probability_of(getStateIndex('I', j)) + ins(j, i - 1),
								_states[getStateIndex('D', j)]->transitions()->log_probability_of(getStateIndex('I', j)) + del(j, i - 1)));
	}
	for (j = 2; j < n_match_states - 1; j++) {
		for (int i = 1; i < seq_len; i++) {

			mat(j, i) = _states[getStateIndex('M', j)]->emission()->log_probability_of(s[i - 1])
					+ log_sum(_states[getStateIndex('M', j - 1)]->transitions()->log_probability_of(getStateIndex('M', j)) + mat(j - 1, i - 1),
							log_sum(_states[getStateIndex('I', j - 1)]->transitions()->log_probability_of(getStateIndex('M', j)) + ins(j - 1, i - 1),
									_states[getStateIndex('D', j - 1)]->transitions()->log_probability_of(getStateIndex('M', j)) + del(j - 1, i - 1)));

			del(j, i) = log_sum(_states[getStateIndex('M', j - 1)]->transitions()->log_probability_of(getStateIndex('D', j)) + mat(j - 1, i),
					log_sum(_states[getStateIndex('I', j - 1)]->transitions()->log_probability_of(getStateIndex('D', j)) + ins(j - 1, i),
							_states[getStateIndex('D', j - 1)]->transitions()->log_probability_of(getStateIndex('D', j)) + del(j - 1, i)));

			ins(j, i) = _states[getStateIndex('I', j)]->emission()->log_probability_of(s[i - 1])
					+ log_sum(_states[getStateIndex('M', j)]->transitions()->log_probability_of(getStateIndex('I', j)) + mat(j, i - 1),
							log_sum(_states[getStateIndex('I', j)]->transitions()->log_probability_of(getStateIndex('I', j)) + ins(j, i - 1),
									_states[getStateIndex('D', j)]->transitions()->log_probability_of(getStateIndex('I', j)) + del(j, i - 1)));
		}
	}

	/*
	 cerr << "================================================================" << endl;
	 cerr << "matriz ins: " << endl;
	 for (int j = 0; j < n_match_states; j++) {
	 for (int i = 0; i < seq_len; i++) {
	 cerr << ins(j, i) << " ";
	 }
	 cerr << endl;
	 }
	 cerr << "\n\n";

	 cerr << "matriz mat: " << endl;
	 for (int j = 0; j < n_match_states; j++) {
	 for (int i = 0; i < seq_len; i++) {
	 cerr << mat(j, i) << " ";
	 }
	 cerr << endl;
	 }
	 cerr << "\n\n";

	 cerr << "matriz del: " << endl;
	 for (int j = 0; j < n_match_states; j++) {
	 for (int i = 0; i < seq_len; i++) {
	 cerr << del(j, i) << " ";
	 }
	 cerr << endl;
	 }
	 cerr << "\n\n";
	 */
	alpha = mat;
	beta = ins;
	gamma = del;

	j = n_match_states - 1;

	int i = seq_len;

	return log_sum(_states[getStateIndex('M', j - 1)]->transitions()->log_probability_of(getStateIndex('M', j)) + mat(j - 1, i - 1),
			log_sum(_states[getStateIndex('I', j - 1)]->transitions()->log_probability_of(getStateIndex('M', j)) + ins(j - 1, i - 1),
					_states[getStateIndex('D', j - 1)]->transitions()->log_probability_of(getStateIndex('M', j)) + del(j - 1, i - 1)));
}

//TODO
double ProfileHiddenMarkovModel::backward(const Sequence & s, Matrix &beta) const {
//not_implemented("backward(const Sequence & s, Matrix &beta)");
	return backward(s, beta, beta, beta);
}

//TODO
double ProfileHiddenMarkovModel::backward(const Sequence & s, Matrix &alpha, Matrix &beta, Matrix &gamma) const {
	int st;
	int n_states = _states.size();
	int n_match_states = (n_states + 3) / 3;
	for (st = 0; st < n_states && !getState(st)->emission(); ++st)
		;
	if (st == n_states) {
		cout << "ERROR: There is only silent states." << endl;
		exit(-1);
	}
	int seq_len = s.size() + 1;

	Matrix mat(n_match_states, seq_len + 1);
	Matrix ins(n_match_states, seq_len + 1);
	Matrix del(n_match_states, seq_len + 1);

	for (int j = 0; j < n_match_states; j++) {
		for (int i = 0; i < seq_len + 1; i++) {
			mat(j, i) = -HUGE;
			ins(j, i) = -HUGE;
			del(j, i) = -HUGE;
		}
	}

	mat(n_match_states - 1, seq_len) = 0;

	int i = n_match_states - 2;
	mat(i, seq_len - 1) = _states[getStateIndex('M', i)]->transitions()->log_probability_of(getStateIndex('M', i + 1));
	ins(i, seq_len - 1) = _states[getStateIndex('I', i)]->transitions()->log_probability_of(getStateIndex('M', i + 1));
	del(i, seq_len - 1) = _states[getStateIndex('D', i)]->transitions()->log_probability_of(getStateIndex('M', i + 1));

	int j = n_match_states - 2;
	for (int i = seq_len - 2; i >= 0; i--) {

		mat(j, i) = ins(j, i + 1) + _states[getStateIndex('M', j)]->transitions()->log_probability_of(getStateIndex('I', j))
				+ _states[getStateIndex('I', j)]->emission()->log_probability_of(s[i]);

		ins(j, i) = ins(j, i + 1) + _states[getStateIndex('I', j)]->transitions()->log_probability_of(getStateIndex('I', j))
				+ _states[getStateIndex('I', j)]->emission()->log_probability_of(s[i]);

		del(j, i) = ins(j, i + 1) + _states[getStateIndex('D', j)]->transitions()->log_probability_of(getStateIndex('I', j))
				+ _states[getStateIndex('I', j)]->emission()->log_probability_of(s[i]);

	}

	for (int j = n_match_states - 3; j >= 0; j--) {
		for (int i = seq_len - 2; i >= 0; i--) {

			mat(j, i) = log_sum(
					mat(j + 1, i + 1) + _states[getStateIndex('M', j)]->transitions()->log_probability_of(getStateIndex('M', j + 1))
							+ _states[getStateIndex('M', j + 1)]->emission()->log_probability_of(s[i]),
					log_sum(
							ins(j, i + 1) + _states[getStateIndex('M', j)]->transitions()->log_probability_of(getStateIndex('I', j))
									+ _states[getStateIndex('I', j)]->emission()->log_probability_of(s[i]),
							del(j + 1, i) + _states[getStateIndex('M', j)]->transitions()->log_probability_of(getStateIndex('D', j + 1))));

			ins(j, i) = log_sum(
					mat(j + 1, i + 1) + _states[getStateIndex('I', j)]->transitions()->log_probability_of(getStateIndex('M', j + 1))
							+ _states[getStateIndex('M', j + 1)]->emission()->log_probability_of(s[i]),

					log_sum(
							ins(j, i + 1) + _states[getStateIndex('I', j)]->transitions()->log_probability_of(getStateIndex('I', j))
									+ _states[getStateIndex('I', j)]->emission()->log_probability_of(s[i]),

							del(j + 1, i) + _states[getStateIndex('I', j)]->transitions()->log_probability_of(getStateIndex('D', j + 1))));

			if (j > 0) {
				del(j, i) = log_sum(
						mat(j + 1, i + 1) + _states[getStateIndex('D', j)]->transitions()->log_probability_of(getStateIndex('M', j + 1))
								+ _states[getStateIndex('M', j + 1)]->emission()->log_probability_of(s[i]),

						log_sum(
								ins(j, i + 1) + _states[getStateIndex('D', j)]->transitions()->log_probability_of(getStateIndex('I', j))
										+ _states[getStateIndex('I', j)]->emission()->log_probability_of(s[i]),

								del(j + 1, i) + _states[getStateIndex('D', j)]->transitions()->log_probability_of(getStateIndex('D', j + 1))));
			}

		}
	}

	double score = mat(0, 0);

	for (int j = 0; j < n_match_states; j++) {
		for (int i = 1; i < seq_len + 1; i++) {
			mat(j, i - 1) = mat(j, i);
			del(j, i - 1) = del(j, i);
			ins(j, i - 1) = ins(j, i);
		}
	}

	/*	cerr << "================================================================" << endl;
	 cerr << "matriz ins: " << endl;
	 for (int j = 0; j < n_match_states; j++) {
	 for (int i = 0; i < seq_len; i++) {
	 cerr << ins(j, i) << " ";
	 }
	 cerr << endl;
	 }
	 cerr << "\n\n";

	 cerr << "matriz mat: " << endl;
	 for (int j = 0; j < n_match_states; j++) {
	 for (int i = 0; i < seq_len + 1; i++) {
	 cerr << mat(j, i) << " ";
	 }
	 cerr << endl;
	 }
	 cerr << "\n\n";


	 cerr << "matriz del: " << endl;
	 for (int j = 0; j < n_match_states; j++) {
	 for (int i = 0; i < seq_len; i++) {
	 cerr << del(j, i) << " ";
	 }
	 cerr << endl;
	 }
	 */

	alpha = mat;
	beta = ins;
	gamma = del;
	return score;

}

double ProfileHiddenMarkovModel::viterbi(const Sequence &s, Sequence &path, Matrix & gamma) const {
	int st;
	int n_states = _states.size();
	int n_match_states = (n_states + 3) / 3;
	for (st = 0; st < n_states && !getState(st)->emission(); ++st)
		;
	if (st == n_states) {
		cout << "ERROR: There is only silent states." << endl;
		exit(-1);
	}

	int emiss_size = getState(st)->emission()->size() + 1;
	int seq_len = s.size();
	n_states = n_match_states;
	Matrix mat(n_match_states, seq_len + 2);
	Matrix ins(n_match_states, seq_len + 1);
	Matrix del(n_match_states, seq_len + 1);

	traceback match_t[n_match_states][seq_len + 2];
	traceback deletion_t[n_match_states][seq_len + 1];
	traceback insertion_t[n_match_states][seq_len + 1];

// initialization
	for (int i = 0; i < n_match_states; i++) {
		for (int j = 0; j < seq_len + 2; j++) {
			mat(i, j) = -HUGE;
			match_t[i][j].i = 0;
			match_t[i][j].j = 0;
			match_t[i][j].matriz = 0;
			if (j < seq_len + 1) {
				ins(i, j) = -HUGE;
				insertion_t[i][j].i = 0;
				insertion_t[i][j].j = 0;
				insertion_t[i][j].matriz = 0;
				del(i, j) = -HUGE;
				deletion_t[i][j].i = 0;
				deletion_t[i][j].j = 0;
				deletion_t[i][j].matriz = 0;
			}
		}
	}
	mat(0, 0) = 0;

// recursion
	for (int j = 0; j == 0 && j < n_match_states; j++) {
		for (int i = 1; i < seq_len + 1; ++i) {

			double valor = _states[getStateIndex('M', j)]->transitions()->log_probability_of(getStateIndex('I', j)) + mat(j, i - 1);
			double valor2 = _states[getStateIndex('I', j)]->transitions()->log_probability_of(getStateIndex('I', j)) + ins(j, i - 1);
			ins(j, i) = _states[getStateIndex('I', j)]->emission()->log_probability_of(s[i - 1]) + log(emiss_size) + max(valor, valor2);
			insertion_t[j][i].i = i - 1;
			insertion_t[j][i].j = j;
			insertion_t[j][i].matriz = maxIndex(valor, valor2);

		}
	}

	for (int j = 1; j == 1 && j < n_match_states; j++) {
		for (int i = 1; i < seq_len + 1; ++i) {

			double valor = _states[getStateIndex('M', j - 1)]->transitions()->log_probability_of(getStateIndex('M', j)) + mat(j - 1, i - 1);
			double valor2 = _states[getStateIndex('I', j - 1)]->transitions()->log_probability_of(getStateIndex('M', j)) + ins(j - 1, i - 1);

			mat(j, i) = _states[getStateIndex('M', j)]->emission()->log_probability_of(s[i - 1]) + log(emiss_size) + max(valor, valor2);

			match_t[j][i].i = i - 1;
			match_t[j][i].j = j - 1;

			match_t[j][i].matriz = maxIndex(valor, valor2);

			valor = _states[getStateIndex('M', j)]->transitions()->log_probability_of(getStateIndex('I', j)) + mat(j, i - 1);
			valor2 = _states[getStateIndex('I', j)]->transitions()->log_probability_of(getStateIndex('I', j)) + ins(j, i - 1);
			double valor3 = _states[getStateIndex('D', j)]->transitions()->log_probability_of(getStateIndex('I', j)) + del(j, i - 1);

			ins(j, i) = _states[getStateIndex('I', j)]->emission()->log_probability_of(s[i - 1]) + log(emiss_size) + max(valor, valor2, valor3);

			insertion_t[j][i].i = i - 1;
			insertion_t[j][i].j = j;

			insertion_t[j][i].matriz = maxIndex(valor, valor2, valor3);

			valor = _states[getStateIndex('M', j - 1)]->transitions()->log_probability_of(getStateIndex('D', j)) + mat(j - 1, i);
			valor2 = _states[getStateIndex('I', j - 1)]->transitions()->log_probability_of(getStateIndex('D', j)) + ins(j - 1, i);

			del(j, i) = max(valor, valor2);

			deletion_t[j][i].i = i;
			deletion_t[j][i].j = j - 1;

			deletion_t[j][i].matriz = maxIndex(valor, valor2);
		}
	}
	for (int j = 2; j < n_match_states - 1; j++) {
		for (int i = 1; i < seq_len + 1; ++i) {

			double valor = _states[getStateIndex('M', j - 1)]->transitions()->log_probability_of(getStateIndex('M', j)) + mat(j - 1, i - 1);
			double valor2 = _states[getStateIndex('I', j - 1)]->transitions()->log_probability_of(getStateIndex('M', j)) + ins(j - 1, i - 1);
			double valor3 = _states[getStateIndex('D', j - 1)]->transitions()->log_probability_of(getStateIndex('M', j)) + del(j - 1, i - 1);

			mat(j, i) = _states[getStateIndex('M', j)]->emission()->log_probability_of(s[i - 1]) + log(emiss_size) + max(valor, valor2, valor3);

			match_t[j][i].i = i - 1;
			match_t[j][i].j = j - 1;
			match_t[j][i].matriz = maxIndex(valor, valor2, valor3);

			valor = _states[getStateIndex('M', j)]->transitions()->log_probability_of(getStateIndex('I', j)) + mat(j, i - 1);
			valor2 = _states[getStateIndex('I', j)]->transitions()->log_probability_of(getStateIndex('I', j)) + ins(j, i - 1);
			valor3 = _states[getStateIndex('D', j)]->transitions()->log_probability_of(getStateIndex('I', j)) + del(j, i - 1);

			ins(j, i) = _states[getStateIndex('I', j)]->emission()->log_probability_of(s[i - 1]) + log(emiss_size) + max(valor, valor2, valor3);

			insertion_t[j][i].i = i - 1;
			insertion_t[j][i].j = j;
			insertion_t[j][i].matriz = maxIndex(valor, valor2, valor3);

			valor = _states[getStateIndex('M', j - 1)]->transitions()->log_probability_of(getStateIndex('D', j)) + mat(j - 1, i);
			valor2 = _states[getStateIndex('I', j - 1)]->transitions()->log_probability_of(getStateIndex('D', j)) + ins(j - 1, i);
			valor3 = _states[getStateIndex('D', j - 1)]->transitions()->log_probability_of(getStateIndex('D', j)) + del(j - 1, i);

			del(j, i) = max(valor, valor2, valor3);

			deletion_t[j][i].i = i;
			deletion_t[j][i].j = j - 1;
			deletion_t[j][i].matriz = maxIndex(valor, valor2, valor3);

		}
	}

// termination
	for (int j = n_match_states - 1; j == n_match_states - 1 && j < n_match_states; j++) {
		for (int i = seq_len; i < seq_len + 1; ++i) {

			double valor = _states[getStateIndex('M', j - 1)]->transitions()->log_probability_of(getStateIndex('M', j)) + mat(j - 1, i);
			double valor2 = _states[getStateIndex('I', j - 1)]->transitions()->log_probability_of(getStateIndex('M', j)) + ins(j - 1, i);
			double valor3 = _states[getStateIndex('D', j - 1)]->transitions()->log_probability_of(getStateIndex('M', j)) + del(j - 1, i);

			mat(j, i + 1) = max(valor, valor2, valor3);

			match_t[j][i].i = i;
			match_t[j][i].j = j - 1;

			match_t[j][i].matriz = maxIndex(valor, valor2, valor3);

		}
	}

//DEBUG:Print match, insertion and deletion matrices
	/*
	 cerr << "================================================================" << endl;
	 cerr << "matriz ins: " << endl;
	 for (int j = 0; j < n_match_states; j++) {
	 for (int i = 0; i < seq_len + 1; i++) {
	 cerr << insertion_t[j][i].matriz << insertion_t[j][i].j << insertion_t[j][i].i << " ";
	 }
	 cerr << endl;
	 }
	 cerr << "\n\n";

	 cerr << "matriz mat: " << endl;
	 for (int j = 0; j < n_match_states; j++) {
	 for (int i = 0; i < seq_len + 2; i++) {
	 cerr << match_t[j][i].matriz << match_t[j][i].j << match_t[j][i].i << " ";
	 }
	 cerr << endl;
	 }
	 cerr << "\n\n";

	 cerr << "matriz del: " << endl;
	 for (int j = 0; j < n_match_states; j++) {
	 for (int i = 0; i < seq_len + 1; i++) {
	 cerr << deletion_t[j][i].matriz << deletion_t[j][i].j << deletion_t[j][i].i << " ";
	 }
	 cerr << endl;
	 }
	 cerr << "\n\n";

	 //DEBUG:Print match, insertion and deletion traceback matrices
	 cerr << "================================================================" << endl;
	 cerr << "matriz ins: " << endl;
	 for (int j = 0; j < n_match_states; j++) {
	 for (int i = 0; i < seq_len + 1; i++) {
	 cerr << ins(j, i) << " ";
	 }
	 cerr << endl;
	 }
	 cerr << "\n\n";

	 cerr << "matriz mat: " << endl;
	 for (int j = 0; j < n_match_states; j++) {
	 for (int i = 0; i < seq_len + 2; i++) {
	 cerr << mat(j, i) << " ";
	 }
	 cerr << endl;
	 }
	 cerr << "\n\n";

	 cerr << "matriz del: " << endl;
	 for (int j = 0; j < n_match_states; j++) {
	 for (int i = 0; i < seq_len + 1; i++) {
	 cerr << del(j, i) << " ";
	 }
	 cerr << endl;
	 }
	 cerr << "\n\n";
	 */
// traceback 
	vector<traceback> caminho;

	caminho.push_back(traceback());
	caminho[0].matriz = 1;
	caminho[0].j = n_match_states - 1;
	caminho[0].i = seq_len;

	caminho.push_back(traceback());
	caminho[1].matriz = match_t[caminho[0].j][caminho[0].i].matriz;
	caminho[1].j = match_t[caminho[0].j][caminho[0].i].j;
	caminho[1].i = match_t[caminho[0].j][caminho[0].i].i;

	int j = 1;
	while (!(caminho[j].j == 0 && caminho[j].i == 0 && caminho[j].matriz == 1)) {
		caminho.push_back(traceback());

		if (caminho[j].matriz == 1) {
			caminho[j + 1].matriz = match_t[caminho[j].j][caminho[j].i].matriz;
			caminho[j + 1].j = match_t[caminho[j].j][caminho[j].i].j;
			caminho[j + 1].i = match_t[caminho[j].j][caminho[j].i].i;
		}
		if (caminho[j].matriz == 2) {
			caminho[j + 1].matriz = insertion_t[caminho[j].j][caminho[j].i].matriz;
			caminho[j + 1].j = insertion_t[caminho[j].j][caminho[j].i].j;
			caminho[j + 1].i = insertion_t[caminho[j].j][caminho[j].i].i;
		}
		if (caminho[j].matriz == 3) {
			caminho[j + 1].matriz = deletion_t[caminho[j].j][caminho[j].i].matriz;
			caminho[j + 1].j = deletion_t[caminho[j].j][caminho[j].i].j;
			caminho[j + 1].i = deletion_t[caminho[j].j][caminho[j].i].i;
		}
		j++;
	}

	path.resize(caminho.size());
	int k = caminho.size() - 1;
	for (unsigned int j = 0; j < caminho.size(); j++) {

		if (caminho[k - j].matriz == 1) {
			path[j] = getState(_states[getStateIndex('M', caminho[k - j].j)]->getId())->getName()->id();
		}
		if (caminho[k - j].matriz == 2) {
			path[j] = getState(_states[getStateIndex('I', caminho[k - j].j)]->getId())->getName()->id();
		}
		if (caminho[k - j].matriz == 3) {
			path[j] = getState(_states[getStateIndex('D', caminho[k - j].j)]->getId())->getName()->id();
		}
	}
	return mat(n_match_states - 1, seq_len + 1);
}

////////////////////////////////////////////////
////// Model training///////////////////////////
////////////////////////////////////////////////

void ProfileHiddenMarkovModel::trainMaxLikelihood(SequenceList & observedStates, SequenceList & observedEmissions, int pseudocouts) {
	int s;
	int n_states = _states.size();
	for (s = 0; s < n_states && !getState(s)->emission(); ++s)
		;
	if (s == n_states) {
		cout << "ERROR: There is only silent states." << endl;
		exit(-1);
	}
	int emiss_size = getState(s)->emission()->size() + 1;

	Matrix emiss(n_states, emiss_size);
	Matrix trans(n_states, n_states);

	emiss.clear();
	trans.clear();

	if (observedStates.size() == 0)
		return;

// Counting emissions
	for (unsigned int seq = 0; seq < observedStates.size(); ++seq) {
		int pos = 0;

// cout << observedStates.size() << endl;
// cout << observedEmissions.size() << endl;

		/*
		 for (int i = 0; i < observedStates[seq].size();++i) {
		 cout << " " << getState(observedStates[seq][i])->getName()->name();
		 }
		 cout << endl;

		 for (int i = 0; i < observedEmissions[seq].size();++i) {
		 cout << " " << observedEmissions[seq][i];
		 }
		 cout << endl;
		 */

		for (unsigned int i = 0; i < observedStates[seq].size(); ++i) {
			//  cout << " pos = " << pos << endl;
			if (getState(observedStates[seq][i])->emission()) {
				//     cout << "observedStates[seq][i] = " << observedStates[seq][i] << " observedEmissions[seq][pos++] = " << observedEmissions[seq][pos] << endl;
				//    cout << "emiss_size = " << emiss_size;
				emiss(observedStates[seq][i], observedEmissions[seq][pos++])++;}
			}
		}

// Counting transitions
	for (unsigned int seq = 0; seq < observedStates.size(); ++seq) {
		for (unsigned int i = 0; i < observedStates[seq].size() - 1; ++i) {
			trans(observedStates[seq][i], observedStates[seq][i + 1])++;}
		}
	trans(*(observedStates[0].end() - 1), *(observedStates[0].end() - 1))++;

//DEBUG:Print emiss matrix
	/*cout << "Emissions matrix:" << endl;
	 for (int i = 0; i < emiss.size1(); ++i) {
	 for (int j = 0; j < emiss.size2(); ++j)
	 cout << emiss(i,j) << " ";
	 cout << endl;
	 }
	 cout << endl;*/

//DEBUG:Print trans matrix
	/* cout << "Transitions matrix:" << endl;
	 for (int i = 0; i < trans.size1(); ++i) {
	 for (int j = 0; j < trans.size2(); ++j)
	 cout << trans(i,j) << " ";
	 cout << endl;
	 }
	 cout << endl;*/

// Emission Pseudocounts
	for
(	int i = 0; i < n_states; ++i) {
		if (getState(i)->emission()) {
			for (int symbol = 0; symbol <= getState(i)->emission()->size(); ++symbol)
			emiss(i, symbol) += pseudocouts;
		}
	}

//Transitions Pseudocounts
	int n_match_states = (n_states + 3) / 3;
	for (int i = 0; i < n_match_states - 1; ++i) {
		trans(getStateIndex('M', i), getStateIndex('M', i + 1)) += pseudocouts;
		trans(getStateIndex('M', i), getStateIndex('I', i)) += pseudocouts;
		trans(getStateIndex('I', i), getStateIndex('M', i + 1)) += pseudocouts;
		trans(getStateIndex('I', i), getStateIndex('I', i)) += pseudocouts;

		if (i != 0) {
			trans(getStateIndex('D', i), getStateIndex('M', i + 1)) += pseudocouts;
			trans(getStateIndex('D', i), getStateIndex('I', i)) += pseudocouts;
			if (i != n_match_states - 2) {
				trans(getStateIndex('D', i), getStateIndex('D', i + 1)) += pseudocouts;
			}
		}
		if (i != n_match_states - 2) {
			trans(getStateIndex('M', i), getStateIndex('D', i + 1)) += pseudocouts;
			trans(getStateIndex('I', i), getStateIndex('D', i + 1)) += pseudocouts;
		}
	}

//Emission probabilities
	for (int i = 0; i < n_states; ++i) {
		int sum = 0;
		for (int symbol = 0; symbol < emiss_size; ++symbol)
			sum += emiss(i, symbol);
		if (sum == 0)
			continue;
		for (int symbol = 0; symbol < emiss_size; ++symbol)
			emiss(i, symbol) /= sum;
	}

//Transition probabilities
	for (int i = 0; i < n_states; ++i) {
		int sum = 0;
		for (int j = 0; j < n_states; ++j)
			sum += trans(i, j);
		if (sum == 0)
			continue;
		for (int j = 0; j < n_states; ++j)
			trans(i, j) /= sum;
	}

//DEBUG:Print emiss matrix
	/*cout << "Emissions matrix:" << endl;
	 for (int i = 0; i < emiss.size1(); ++i) {
	 for (int j = 0; j < emiss.size2(); ++j)
	 cout << emiss(i,j) << " ";
	 cout << endl;
	 }
	 cout << endl;*/

//DEBUG:Print trans matrix
	/*cout << "Transitions matrix:" << endl;
	 for (int i = 0; i < trans.size1(); ++i) {
	 for (int j = 0; j < trans.size2(); ++j)
	 cout << trans(i,j) << " ";
	 cout << endl;
	 }
	 cout << endl;*/

// Puts the emission matrix info inside HMMStates
	for (int i = 0; i < n_states; ++i) {
		for (int j = 0; j < emiss_size; ++j) {
			if (getState(i)->emission() && emiss(i, j))
				getState(i)->emission()->log_probability_of(j, log(emiss(i, j)));
			else if (getState(i)->emission())
				getState(i)->emission()->log_probability_of(j, -DBL_MAX);
		}
	}

// Puts the transition matrix info inside HMMStates
	for (int i = 0; i < n_states; ++i) {
		for (int j = 0; j < n_states; ++j) {
			if (trans(i, j))
				getState(i)->transitions()->log_probability_of(j, log(trans(i, j)));
			else
				getState(i)->transitions()->log_probability_of(j, -DBL_MAX);
		}
	}
}

void ProfileHiddenMarkovModel::trainBaumWelch(SequenceList & training_set, int maxiterations, double diff_threshold, int pseudocount) {
	int s;
	int n_states = _states.size();
	int n_match_states = (_states.size() + 3) / 3; // n_match_states = m + begin states + end state
	for (s = 0; s < n_states && !getState(s)->emission(); ++s)
		;
	if (s == n_states) {
		cout << "ERROR: There is only silent states." << endl;
		exit(-1);
	}

	int alphabet_size = alphabet()->size();

	if (maxiterations < 0)
		maxiterations = 500;

	Matrix E_m(n_match_states, alphabet_size);
	Matrix E_i(n_match_states, alphabet_size);
	Matrix A(n_states, n_states);

	Matrix sumA(1, n_states);
	Matrix sumE_m(1, n_match_states);
	Matrix sumE_i(1, n_match_states);

	double p = 0;
	double sumP = 0;
	double last = HUGE;

	for (int iterations = 0; iterations < maxiterations; iterations++) {
		sumP = 0;
		for (int j = 0; j < n_match_states; j++) {
			sumE_m(0, j) = -HUGE;
			sumE_i(0, j) = -HUGE;
			for (int i = 0; i < alphabet_size; i++) {
				E_m(j, i) = pseudocount / alphabet_size;
				E_i(j, i) = pseudocount / alphabet_size;
			}
		}

		for (int j = 0; j < n_states; j++) {
			for (int i = 0; i < n_states; i++) {
				if (j == 0)
					sumA(j, i) = -HUGE;
				A(j, i) = pseudocount / training_set.size();
			}
		}

		for (unsigned int s = 0; s < training_set.size(); s++) {

			Matrix match_for(n_match_states, training_set[s].size() + 1);
			Matrix match_back(n_match_states, training_set[s].size() + 1);
			Matrix insert_for(n_match_states, training_set[s].size() + 1);
			Matrix insert_back(n_match_states, training_set[s].size() + 1);
			Matrix delete_for(n_match_states, training_set[s].size() + 1);
			Matrix delete_back(n_match_states, training_set[s].size() + 1);

			p = forward(training_set[s], match_for, insert_for, delete_for);
			sumP += p;

			backward(training_set[s], match_back, insert_back, delete_back);
			// transition probabilities estimation

			for (int j = 0; j < n_match_states - 1; j++) {

				double sumMM = -HUGE;
				double sumMI = -HUGE;
				double sumMD = -HUGE;

				double sumIM = -HUGE;
				double sumII = -HUGE;
				double sumID = -HUGE;

				double sumDM = -HUGE;
				double sumDI = -HUGE;
				double sumDD = -HUGE;

				for (int t = 0; t < (int) training_set[s].size(); t++) {

					if (j < n_match_states - 2) {

						sumMM = log_sum(sumMM,
								match_for(j, t) + _states[getStateIndex('M', j)]->transitions()->log_probability_of(getStateIndex('M', j + 1))
										+ _states[getStateIndex('M', j + 1)]->emission()->log_probability_of(training_set[s][t + 1]) + match_back(j + 1, t + 1));

						sumMI = log_sum(sumMI,
								match_for(j, t) + _states[getStateIndex('M', j)]->transitions()->log_probability_of(getStateIndex('I', j))
										+ _states[getStateIndex('I', j)]->emission()->log_probability_of(training_set[s][t + 1]) + insert_back(j, t + 1));

						sumMD = log_sum(sumMD,
								match_for(j, t) + _states[getStateIndex('M', j)]->transitions()->log_probability_of(getStateIndex('D', j + 1)) + delete_back(j + 1, t));

						sumIM = log_sum(sumIM,
								insert_for(j, t) + _states[getStateIndex('I', j)]->transitions()->log_probability_of(getStateIndex('M', j + 1))
										+ _states[getStateIndex('M', j + 1)]->emission()->log_probability_of(training_set[s][t + 1]) + match_back(j + 1, t + 1));

						sumII = log_sum(sumII,
								insert_for(j, t) + _states[getStateIndex('I', j)]->transitions()->log_probability_of(getStateIndex('I', j))
										+ _states[getStateIndex('I', j)]->emission()->log_probability_of(training_set[s][t + 1]) + insert_back(j, t + 1));

						sumID = log_sum(sumID,
								insert_for(j, t) + _states[getStateIndex('I', j)]->transitions()->log_probability_of(getStateIndex('D', j + 1)) + delete_back(j + 1, t));

						if (j > 0) { // there's no D0 state

							sumDM = log_sum(sumDM,
									delete_for(j, t) + _states[getStateIndex('D', j)]->transitions()->log_probability_of(getStateIndex('M', j + 1))
											+ _states[getStateIndex('M', j + 1)]->emission()->log_probability_of(training_set[s][t + 1]) + match_back(j + 1, t + 1));

							sumDI = log_sum(sumDI,
									delete_for(j, t) + _states[getStateIndex('D', j)]->transitions()->log_probability_of(getStateIndex('I', j))
											+ _states[getStateIndex('I', j)]->emission()->log_probability_of(training_set[s][t + 1]) + insert_back(j, t + 1));

							sumDD = log_sum(sumDD,
									delete_for(j, t) + _states[getStateIndex('D', j)]->transitions()->log_probability_of(getStateIndex('D', j + 1)) + delete_back(j + 1, t));
						}
					} else if (j == n_match_states - 2) { // termination

						sumMM = log_sum(sumMM,
								match_for(j, t) + _states[getStateIndex('M', j)]->transitions()->log_probability_of(getStateIndex('M', j + 1)) + match_back(j + 1, t + 1));

						sumMI = log_sum(sumMI, match_for(j, t) + _states[getStateIndex('M', j)]->transitions()->log_probability_of(getStateIndex('I', j)) + insert_back(j, t + 1));

						sumIM = log_sum(sumIM,
								insert_for(j, t) + _states[getStateIndex('I', j)]->transitions()->log_probability_of(getStateIndex('M', j + 1)) + match_back(j + 1, t + 1));

						sumII = log_sum(sumII, insert_for(j, t) + _states[getStateIndex('I', j)]->transitions()->log_probability_of(getStateIndex('I', j)) + insert_back(j, t + 1));

						sumDM = log_sum(sumDM,
								delete_for(j, t) + _states[getStateIndex('D', j)]->transitions()->log_probability_of(getStateIndex('M', j + 1)) + match_back(j + 1, t + 1));

						sumDI = log_sum(sumDI, delete_for(j, t) + _states[getStateIndex('D', j)]->transitions()->log_probability_of(getStateIndex('I', j)) + insert_back(j, t + 1));

					}
				}

				// assignment of the sum's previously calculated
				if (j < n_match_states - 2) {

					A(getStateIndex('M', j), getStateIndex('M', j + 1)) = log_sum(A(getStateIndex('M', j), getStateIndex('M', j + 1)), sumMM - p);
					A(getStateIndex('M', j), getStateIndex('I', j)) = log_sum(A(getStateIndex('M', j), getStateIndex('I', j)), sumMI - p);
					A(getStateIndex('M', j), getStateIndex('D', j + 1)) = log_sum(A(getStateIndex('M', j), getStateIndex('D', j + 1)), sumMD - p);
					A(getStateIndex('I', j), getStateIndex('M', j + 1)) = log_sum(A(getStateIndex('I', j), getStateIndex('M', j + 1)), sumIM - p);
					A(getStateIndex('I', j), getStateIndex('I', j)) = log_sum(A(getStateIndex('I', j), getStateIndex('I', j)), sumII - p);
					A(getStateIndex('I', j), getStateIndex('D', j + 1)) = log_sum(A(getStateIndex('I', j), getStateIndex('D', j + 1)), sumID - p);
					if (j > 0) {
						A(getStateIndex('D', j), getStateIndex('M', j + 1)) = log_sum(A(getStateIndex('D', j), getStateIndex('M', j + 1)), sumDM - p);
						A(getStateIndex('D', j), getStateIndex('I', j)) = log_sum(A(getStateIndex('D', j), getStateIndex('I', j)), sumDI - p);
						A(getStateIndex('D', j), getStateIndex('D', j + 1)) = log_sum(A(getStateIndex('D', j), getStateIndex('D', j + 1)), sumDD - p);
					}
				} else if (j == n_match_states - 2) {
					A(getStateIndex('M', j), getStateIndex('I', j)) = log_sum(A(getStateIndex('M', j), getStateIndex('I', j)), sumMI - p);
					A(getStateIndex('I', j), getStateIndex('I', j)) = log_sum(A(getStateIndex('I', j), getStateIndex('I', j)), sumII - p);
					A(getStateIndex('D', j), getStateIndex('I', j)) = log_sum(A(getStateIndex('D', j), getStateIndex('I', j)), sumDI - p);

					A(getStateIndex('M', j), getStateIndex('M', j + 1)) = log_sum(A(getStateIndex('M', j), getStateIndex('M', j + 1)), sumMM - p);
					A(getStateIndex('I', j), getStateIndex('M', j + 1)) = log_sum(A(getStateIndex('I', j), getStateIndex('M', j + 1)), sumIM - p);
					A(getStateIndex('D', j), getStateIndex('M', j + 1)) = log_sum(A(getStateIndex('D', j), getStateIndex('M', j + 1)), sumDM - p);

				}

				// emisson probabilities estimation
				for (int sigma = 0; sigma < alphabet_size; sigma++) {

					double sum_E_i = -HUGE;
					double sum_E_m = -HUGE;

					for (int t = 0; t < (int) training_set[s].size(); t++) {

						if (sigma == training_set[s][t]) {

							if (j > 0)  // no emission for M0 state
								sum_E_m = log_sum(sum_E_m, match_for(j, t + 1) + match_back(j, t));
							sum_E_i = log_sum(sum_E_i, insert_for(j, t + 1) + insert_back(j, t));
						}
					}
					if (j > 0) // no emission for M0 state
						E_m(j, sigma) = log_sum(E_m(j, sigma), sum_E_m - p);
					E_i(j, sigma) = log_sum(E_i(j, sigma), sum_E_i - p);
				}

			}

		}

		for (int k = 0; k < n_match_states; k++) {

			if (k < n_match_states - 2) {

				sumA(0, getStateIndex('M', k)) = log_sum(
						log_sum(log_sum(sumA(0, getStateIndex('M', k)), A(getStateIndex('M', k), getStateIndex('M', k + 1))), A(getStateIndex('M', k), getStateIndex('I', k))),
						A(getStateIndex('M', k), getStateIndex('D', k + 1)));

				sumA(0, getStateIndex('I', k)) = log_sum(
						log_sum(log_sum(sumA(0, getStateIndex('I', k)), A(getStateIndex('I', k), getStateIndex('M', k + 1))), A(getStateIndex('I', k), getStateIndex('I', k))),
						A(getStateIndex('I', k), getStateIndex('D', k + 1)));

				if (k > 0)
					sumA(0, getStateIndex('D', k)) = log_sum(
							log_sum(log_sum(sumA(0, getStateIndex('D', k)), A(getStateIndex('D', k), getStateIndex('M', k + 1))), A(getStateIndex('D', k), getStateIndex('I', k))),
							A(getStateIndex('D', k), getStateIndex('D', k + 1)));

			} else if (k == n_match_states - 2) {
				sumA(0, getStateIndex('M', k)) = log_sum(log_sum(sumA(0, getStateIndex('M', k)), A(getStateIndex('M', k), getStateIndex('M', k + 1))),
						A(getStateIndex('M', k), getStateIndex('I', k)));

				sumA(0, getStateIndex('I', k)) = log_sum(log_sum(sumA(0, getStateIndex('I', k)), A(getStateIndex('I', k), getStateIndex('M', k + 1))),
						A(getStateIndex('I', k), getStateIndex('I', k)));

				sumA(0, getStateIndex('D', k)) = log_sum(log_sum(sumA(0, getStateIndex('D', k)), A(getStateIndex('D', k), getStateIndex('M', k + 1))),
						A(getStateIndex('D', k), getStateIndex('I', k)));

			}

			for (int b = 0; b < alphabet_size; b++) {
				sumE_i(0, k) = log_sum(sumE_i(0, k), E_i(k, b));
				sumE_m(0, k) = log_sum(sumE_m(0, k), E_m(k, b));
			}

		}

		for (int j = 0; j < n_match_states; j++) {

			if (j < n_match_states - 2) {
				getState(getStateIndex('M', j))->transitions()->log_probability_of(getStateIndex('M', j + 1),
						A(getStateIndex('M', j), getStateIndex('M', j + 1)) - sumA(0, getStateIndex('M', j)));

				getState(getStateIndex('M', j))->transitions()->log_probability_of(getStateIndex('D', j + 1),
						A(getStateIndex('M', j), getStateIndex('D', j + 1)) - sumA(0, getStateIndex('M', j)));

				getState(getStateIndex('M', j))->transitions()->log_probability_of(getStateIndex('I', j),
						A(getStateIndex('M', j), getStateIndex('I', j)) - sumA(0, getStateIndex('M', j)));

				getState(getStateIndex('I', j))->transitions()->log_probability_of(getStateIndex('M', j + 1),
						A(getStateIndex('I', j), getStateIndex('M', j + 1)) - sumA(0, getStateIndex('I', j)));

				getState(getStateIndex('I', j))->transitions()->log_probability_of(getStateIndex('D', j + 1),
						A(getStateIndex('I', j), getStateIndex('D', j + 1)) - sumA(0, getStateIndex('I', j)));

				getState(getStateIndex('I', j))->transitions()->log_probability_of(getStateIndex('I', j),
						A(getStateIndex('I', j), getStateIndex('I', j)) - sumA(0, getStateIndex('I', j)));

				if (j > 0) {
					getState(getStateIndex('D', j))->transitions()->log_probability_of(getStateIndex('M', j + 1),
							A(getStateIndex('D', j), getStateIndex('M', j + 1)) - sumA(0, getStateIndex('D', j)));

					getState(getStateIndex('D', j))->transitions()->log_probability_of(getStateIndex('D', j + 1),
							A(getStateIndex('D', j), getStateIndex('D', j + 1)) - sumA(0, getStateIndex('D', j)));

					getState(getStateIndex('D', j))->transitions()->log_probability_of(getStateIndex('I', j),
							A(getStateIndex('D', j), getStateIndex('I', j)) - sumA(0, getStateIndex('D', j)));

				}
			} else if (j == n_match_states - 2) {

				getState(getStateIndex('M', j))->transitions()->log_probability_of(getStateIndex('M', j + 1),
						A(getStateIndex('M', j), getStateIndex('M', j + 1)) - sumA(0, getStateIndex('M', j)));

				getState(getStateIndex('M', j))->transitions()->log_probability_of(getStateIndex('I', j),
						A(getStateIndex('M', j), getStateIndex('I', j)) - sumA(0, getStateIndex('M', j)));

				getState(getStateIndex('I', j))->transitions()->log_probability_of(getStateIndex('M', j + 1),
						A(getStateIndex('I', j), getStateIndex('M', j + 1)) - sumA(0, getStateIndex('I', j)));

				getState(getStateIndex('I', j))->transitions()->log_probability_of(getStateIndex('I', j),
						A(getStateIndex('I', j), getStateIndex('I', j)) - sumA(0, getStateIndex('I', j)));

				getState(getStateIndex('D', j))->transitions()->log_probability_of(getStateIndex('M', j + 1),
						A(getStateIndex('D', j), getStateIndex('M', j + 1)) - sumA(0, getStateIndex('D', j)));

				getState(getStateIndex('D', j))->transitions()->log_probability_of(getStateIndex('I', j),
						A(getStateIndex('D', j), getStateIndex('I', j)) - sumA(0, getStateIndex('D', j)));

			}

			for (int i = 0; i < alphabet_size; i++) {
				if (j < n_match_states - 1) {

					if (j > 0)
						getState(getStateIndex('M', j))->emission()->log_probability_of(i, E_m(j, i) - sumE_m(0, j));
					getState(getStateIndex('I', j))->emission()->log_probability_of(i, E_i(j, i) - sumE_i(0, j));

				}

			}

		}
	//	cerr << "iteração " << iterations << " : " << sumP/training_set.size() << endl;
		if (fabs(last - (sumP / training_set.size())) < diff_threshold)
			break;

#if 0
		cerr << "iteration: " << iterations << endl;
		fprintf(stderr, "LL: %lf\n" , p );
		cerr << "Diff: " << sumP / training_set.size(); << endl;
#endif


		last = sumP / training_set.size();

	}

} // - 3,549
////////////////////////////////////////////////
////// Model Initialization ////////////////////
////////////////////////////////////////////////

void ProfileHiddenMarkovModel::initialize(const ProbabilisticModelParameters & parameters) {
	ProbabilisticModelParameterValuePtr state_names = parameters.getMandatoryParameterValue("state_names");
	ProbabilisticModelParameterValuePtr observation_symbols = parameters.getMandatoryParameterValue("observation_symbols");
	ProbabilisticModelParameterValuePtr initial_probabilities = parameters.getMandatoryParameterValue("initial_probabilities");
	ProbabilisticModelParameterValuePtr transitions = parameters.getMandatoryParameterValue("transitions");
	ProbabilisticModelParameterValuePtr emissions = parameters.getMandatoryParameterValue("emission_probabilities");

	std::vector<HMMStatePtr> state_list;
	AlphabetPtr states = AlphabetPtr(new Alphabet());
	AlphabetPtr observations = AlphabetPtr(new Alphabet());

	states->initializeFromVector(state_names->getStringVector());
	observations->initializeFromVector(observation_symbols->getStringVector());

	std::map<std::string, double>::const_iterator it;
	std::map<std::string, std::vector<double> >::const_iterator it2;

	DiscreteIIDModelPtr pi = DiscreteIIDModelPtr(new DiscreteIIDModel());
	pi->initializeFromMap(initial_probabilities->getDoubleMap(), states);

	std::map<std::string, double> emisspar = emissions->getDoubleMap();
	std::map<std::string, double> transpar = transitions->getDoubleMap();

	std::map<std::string, DoubleVector> emiss;
	std::map<std::string, DoubleVector> trans;

	for (it = emisspar.begin(); it != emisspar.end(); it++) {
		std::vector<std::string> splited;
		boost::regex separator("\\|");
		split_regex(it->first, splited, separator);
		if (splited.size() == 1)
			splited.push_back("");
		std::string symbol(splited[0]);
		std::string state(splited[1]);

		std::map<std::string, DoubleVector>::iterator eit;
		eit = emiss.find(state);
		if (eit == emiss.end()) {
			int id = observations->getSymbol(symbol)->id();
			emiss[state].resize(observations->size());
			if ((id >= 0) && (id < (int) (emiss[state]).size()))
				(emiss[state])[id] = it->second;
		} else {
			int id = observations->getSymbol(symbol)->id();
			if ((id >= 0) && (id < (int) (eit->second).size()))
				(eit->second)[id] = it->second;
		}
	}

	for (it = transpar.begin(); it != transpar.end(); it++) {
		std::vector<std::string> splited;
		boost::regex separator("\\|");
		split_regex(it->first, splited, separator);
		if (splited.size() == 1)
			splited.push_back("");

		std::string to(splited[0]);
		std::string from(splited[1]);

		if (trans.find(from) == trans.end()) {
			int id = states->getSymbol(to)->id();
			DoubleVector probs;
			probs.resize(states->size());
			trans[from] = probs;
			if (id < (int) trans[from].size())
				trans[from][id] = it->second;
		} else {
			int id = states->getSymbol(to)->id();
			if (id < (int) trans[from].size())
				trans[from][id] = it->second;
		}
	}
	for (unsigned int i = 0; i < states->size(); i++) {
		SymbolPtr state_name = states->getSymbol(i);
		DiscreteIIDModelPtr e;
		DiscreteIIDModelPtr t;
		it2 = emiss.find(state_name->name());
		if (it2 != emiss.end())
			e = DiscreteIIDModelPtr(new DiscreteIIDModel(it2->second));
		it2 = trans.find(state_name->name());
		if (it2 != trans.end())
			t = DiscreteIIDModelPtr(new DiscreteIIDModel(it2->second));
		else {
			std::cerr << "ERROR: Could not configure the state " << state_name->name() << "!" << std::endl;
			exit(-1);
		}
		HMMStatePtr statePtr = HMMStatePtr(new HMMState(state_list.size(), state_name, e, t));
		state_list.push_back(statePtr);
	}

	setStates(state_list, states);
	setInitialProbability(pi);
	setObservationSymbols(observations);
}

////////////////////////////////////////////////////
///////// Auxiliary and debug functions ////////////
////////////////////////////////////////////////////

double ProfileHiddenMarkovModel::max(double a, double b, double c) const {
	if (a > b && a > c)
		return a;
	if (b > c)
		return b;
	return c;
}

double ProfileHiddenMarkovModel::max(double a, double b) const {
	return (a > b) ? a : b;
}

int ProfileHiddenMarkovModel::maxIndex(double a, double b, double c) const {
	if (a > b && a > c)
		return 1;
	if (b > c)
		return 2;
	return 3;
}

int ProfileHiddenMarkovModel::maxIndex(double a, double b) const {
	return (a > b) ? 1 : 2;
}

std::string ProfileHiddenMarkovModel::str() const {
	int nstates = _states.size();
	std::stringstream out;
	out << "model_name = \"" << model_name() << "\"" << std::endl;
	out << "state_names = (";

	out << "\"" << getStateName(0) << "\"";
	for (int i = 1; i < (int) getStateNames()->size(); i++)
		out << ",\"" << getStateName(i) << "\"";
	out << ")" << std::endl;

	out << "observation_symbols = (";
	out << "\"" << alphabet()->getSymbol(0)->name() << "\"";
	for (int i = 1; i < (int) alphabet()->size(); i++)
		out << ",\"" << alphabet()->getSymbol(i)->name() << "\"";
	out << ")" << std::endl;

	out << "transitions = (";
	int first = 1;
	for (int i = 0; i < nstates; i++) {
		for (int j = 0; j < nstates; j++) {
			double prob = exp(getState(i)->transitions()->log_probability_of(j));
			if (prob) {
				if (first) {
					first = 0;
					out << "\"";
				} else
					out << ";\n \"";
				out << getStateName(j) << "\" | \"" << getStateName(i) << "\": " << prob;
			}
		}
	}
	out << ")" << std::endl;

	out << "emission_probabilities = (";
	first = 1;
	for (int i = 0; i < nstates; i++)
		for (int j = 0; j < (int) alphabet()->size(); j++)
			if (getState(i)->emission()) {
				double prob = exp(getState(i)->emission()->log_probability_of(j));
				if (prob) {
					if (first) {
						first = 0;
						out << "\"";
					} else
						out << ";\n \"";
					out << alphabet()->getSymbol(j)->name() << "\" | \"" << getStateName(i) << "\": " << exp(getState(i)->emission()->log_probability_of(j));
				}
			}
	out << ")" << std::endl;

	double sum = 0;
	std::vector<double> probs;
	probs.resize(nstates);
	for (int i = 0; i < nstates; i++) {
		probs[i] = exp(_initial_probability->log_probability_of(i));
		sum += probs[i];
	}

	out << "initial_probabilities = (";
	first = 1;
	for (int i = 0; i < nstates; i++) {
		int prob = probs[i] / sum;
		if (prob) {
			if (first) {
				first = 0;
				out << "\"";
			} else
				out << ";\n \"";
			out << getStateName(i) << "\": " << probs[i] / sum;
		}
	}
	out << ")" << std::endl;
	return out.str();
}

int ProfileHiddenMarkovModel::getStateIndex(char type, int index) const {
	stringstream name;
	name << type << index;
	return _state_names->getSymbol(name.str())->id();
}

int ProfileHiddenMarkovModel::getObservationIndex(char type) const {
	stringstream name;
	name << type;
	return alphabet()->getSymbol(name.str())->id();
}

std::string ProfileHiddenMarkovModel::getStateName(int state) const {
	return getState(state)->getName()->name();
}

Sequence & ProfileHiddenMarkovModel::chooseObservation(Sequence & h, int i, int state) const {
	if ((state >= 0) && (!getState(state)->isSilent()))
		return getState(state)->emission()->chooseWithHistory(h, i, 1);
	return h;
}
int ProfileHiddenMarkovModel::chooseState(int state) const {
	return getState(state)->transitions()->choose();
}
int ProfileHiddenMarkovModel::chooseFirstState() const {
	return _initial_probability->choose();
}

Sequence & ProfileHiddenMarkovModel::choose(Sequence & h, Sequence & path, int i, int size) const {
	assert(path.size() == h.size());
	int n_match_states = (_states.size() + 3) / 3;
	int last_state = getStateIndex('M', n_match_states - 1);
	int state = chooseFirstState();
	int states_c = 0;
	int emiss_c = 0;

	if (((i - 1) < (int) path.size()) && (i - 1) >= 0)
		state = path[i - 1];

	if (path.size() > 0)
		path[0] = state;
	else
		path.push_back(state);
	states_c++;

	while (state != last_state) {
		if (getState(state)->emission()) {
			chooseObservation(h, i + emiss_c, state);
			emiss_c++;
		}

		state = chooseState(state); // next state

		if (states_c < (int) path.size())
			path[states_c] = state;
		else
			path.push_back(state);
		states_c++;
	}
//h.resize(size); This is a possible bug in DecodableModel, I believe these lines should not be there..
//path.resize(size);
	return h;
}

ProbabilisticModelParameters ProfileHiddenMarkovModel::parameters() const {
	ProbabilisticModelParameters answer;
	int nstates = _states.size();
	answer.add("model_name", StringParameterValuePtr(new StringParameterValue(model_name().c_str())));
	answer.add("state_names", _state_names->getParameterValue());
	answer.add("observation_symbols", alphabet()->getParameterValue());
	std::map<std::string, double> trans;
	std::stringstream out;
	out << getStateName(0) << "|" << getStateName(0);
	trans[out.str()] = exp(getState(0)->transitions()->log_probability_of(0));
	for (int i = 0; i < nstates; i++)
		for (int j = 0; j < nstates; j++)
			if ((i != 0) || (j != 0)) {
				std::stringstream out2;
				out2 << getStateName(j) << "|" << getStateName(i);
				trans[out2.str()] = exp(getState(i)->transitions()->log_probability_of(j));
			}
	answer.add("transitions", DoubleMapParameterValuePtr(new DoubleMapParameterValue(trans)));

	std::map<std::string, double> emission;
	std::stringstream out3;
	out3 << alphabet()->getSymbol(0)->name() << "|" << getStateName(0);
	if (getState(0)->emission())
		emission[out3.str()] = exp(getState(0)->emission()->log_probability_of(0));
	for (int i = 0; i < nstates; i++)
		for (int j = 0; j < (int) alphabet()->size(); j++)
			if (((i != 0) || (j != 0)) && getState(i)->emission()) {
				std::stringstream out4;
				out4 << alphabet()->getSymbol(j)->name() << "|" << getStateName(i);
				emission[out4.str()] = exp(getState(i)->emission()->log_probability_of(j));
			}
	answer.add("emission_probabilities", DoubleMapParameterValuePtr(new DoubleMapParameterValue(emission)));
	double sum = 0;
	std::vector<double> probs;
	probs.resize(nstates);
	for (int i = 0; i < nstates; i++) {
		probs[i] = exp(_initial_probability->log_probability_of(i));
		sum += probs[i];
	}
	std::map<std::string, double> initial;
	std::stringstream out5;
	out5 << getStateName(0);
	initial[out5.str()] = probs[0] / sum;
	for (int i = 0; i < nstates; i++)
		for (int j = 0; j < (int) alphabet()->size(); j++)
			if ((i != 0) || (j != 0)) {
				std::stringstream out6;
				out6 << getStateName(i);
				initial[out6.str()] = probs[i] / sum;
			}
	answer.add("initial_probabilities", DoubleMapParameterValuePtr(new DoubleMapParameterValue(initial)));
	return answer;

}

void ProfileHiddenMarkovModel::setInitialProbability(DiscreteIIDModelPtr initial) {
	_initial_probability = initial;
}
void ProfileHiddenMarkovModel::setObservationSymbols(AlphabetPtr obs) {
	tops::ProbabilisticModel::setAlphabet(obs);
}
void ProfileHiddenMarkovModel::setStates(std::vector<HMMStatePtr> states, AlphabetPtr state_names) {
	_states = states;
	_state_names = state_names;
}
}
