# Supplementary material for: ToPS: A Framework to Manipulate Probabilistic Models of Sequence Data
Source: PLoS Comput Biol. 2013 Oct 3;9(10):e1003234. doi: 10.1371/journal.pcbi.1003234 (PMC3789777; doi:10.1371/journal.pcbi.1003234)
Supplement: Software S1 — Source code for ToPS. A compressed file containing the source code for ToPS. (GZ) [file pcbi.1003234.s001.gz › tops/src/ProfileHiddenMarkovModel.hpp]

/*
 *       ProfileProfileHiddenMarkovModel.hpp
 *
 *       Copyright 2011 Vitor Onuchic <vitoronuchic@gmail.com>
 *                      Andr� Yoshiaki Kashiwabara <akashiwabara@usp.br>
 *                      �gor Bon�dio <ibonadio@ime.usp.br>
 *                      Vitor Onuchic <vitoronuchic@gmail.com>
 *                      Alan Mitchell Durham <aland@usp.br>
 *                      Felipe Amado <amadofelipe@gmail.com>
 *
 *       This program is free software; you can redistribute it and/or modify
 *       it under the terms of the GNU  General Public License as published by
 *       the Free Software Foundation; either version 3 of the License, or
 *       (at your option) any later version.
 *
 *       This program is distributed in the hope that it will be useful,
 *       but WITHOUT ANY WARRANTY; without even the implied warranty of
 *       MERCHANTABILITY or FITNESS FOR A PARTICULAR PURPOSE.  See the
 *       GNU General Public License for more details.
 *
 *       You should have received a copy of the GNU General Public License
 *       along with this program; if not, write to the Free Software
 *       Foundation, Inc., 51 Franklin Street, Fifth Floor, Boston,
 *       MA 02110-1301, USA.
 */

#ifndef Profile_ProfileHidden_MARKOV_MODEL
#define Profile_ProfileHidden_MARKOV_MODEL

#include "crossplatform.hpp"
#include "ProbabilisticModel.hpp"
#include "DecodableModel.hpp"
#include "Sequence.hpp"
#include "Alphabet.hpp"
#include "ContextTree.hpp"
#include "HiddenMarkovModel.hpp"
#include "ProfileHiddenMarkovModelCreator.hpp"
#include "util.hpp"
#include <cstdarg>
#include <vector>
#include <cmath>

struct traceback {
	int matriz; // 1 -> match; 2-> insertion; 3->deletion
	int i, j;
};

namespace tops {

class DLLEXPORT ProfileHiddenMarkovModel: public DecodableModel {
public:

	ProfileHiddenMarkovModel() {
	}
	;

	ProfileHiddenMarkovModel(std::vector<HMMStatePtr> states, DiscreteIIDModelPtr initial_probability, AlphabetPtr state_names, AlphabetPtr observation_symbols) :
			_states(states), _initial_probability(initial_probability), _state_names(state_names) {
		tops::ProbabilisticModel::setAlphabet(observation_symbols);
	}

	void setStates(std::vector<HMMStatePtr> states) {
		_states = states;
	}

	virtual ~ProfileHiddenMarkovModel() {
	}

	//! Choose the observation given a state
	virtual Sequence & chooseObservation(Sequence & h, int i, int state) const;
	//! Choose a state
	virtual int chooseState(int state) const;
	//! Choose first state
	virtual int chooseFirstState() const;

	virtual Sequence & choose(Sequence & h, Sequence & path, int i, int size) const;

	virtual AlphabetPtr getStateNames() const {
		return _state_names;
	}
	virtual std::string getStateName(int state) const;

	virtual std::string str() const;

	virtual void setState(int id, HMMStatePtr state) {
		if (_states.size() < _state_names->size())
			_states.resize(_state_names->size());
		_states[id] = state;
		state->setId(id);
	}

	virtual HMMStatePtr getState(int id) const {
		return _states[id];
	}

	virtual int getStateIndex(char type, int index) const;

	virtual int getObservationIndex(char type) const;

	//! Forward algorithm
	virtual double forward(const Sequence & s, Matrix &alpha) const;

	//! Forward algorithm
	double forward(const Sequence & s, Matrix &alpha, Matrix &beta, Matrix &gamma) const;

	//! Backward algorithm
	virtual double backward(const Sequence & s, Matrix &beta) const;

	//! Backward algorithm
	double backward(const Sequence & s, Matrix &alpha, Matrix &beta, Matrix &gamma) const;

	//! Viterbi algorithm
	virtual double viterbi(const Sequence &s, Sequence &path, Matrix & gamma) const;

	virtual std::string model_name() const {
		return "ProfileHiddenMarkovModel";
	}
	/*
	 virtual ProbabilisticModelCreatorPtr getFactory() const {
	 return ProfileHiddenMarkovModelCreatorPtr(new ProfileHiddenMarkovModelCreator());
	 }
	 */

	virtual DecodableModel * decodable() {
		return this;
	}
        using tops::ProbabilisticModel::trainBaumWelch;
	virtual void trainMaxLikelihood(SequenceList & observedStates, SequenceList & observedEmissions, int pseudocouts);
	virtual void trainBaumWelch(SequenceList & training_set, int maxiterations, double diff, int pseudocount);

	virtual void initialize(const ProbabilisticModelParameters & par);

	virtual ProbabilisticModelParameters parameters() const;

	void setInitialProbability(DiscreteIIDModelPtr initial);
	void setObservationSymbols(AlphabetPtr obs);
	void setStates(std::vector<HMMStatePtr> states, AlphabetPtr state_names);

	virtual ProfileHiddenMarkovModel * profileDecodable() {
		return this;
	}

private:
	std::vector<HMMStatePtr> _states;
	DiscreteIIDModelPtr _initial_probability;
	std::vector<double> _ctFactors;
	AlphabetPtr _state_names;
	//void scale(std::vector<double> & in, int t);
	double max(double a, double b, double c) const;

	double max(double a, double b) const;
	//std::vector<double> iterate(Sequence & obs);

	int maxIndex(double a, double b, double c) const;
	int maxIndex(double a, double b) const;
};

typedef boost::shared_ptr<ProfileHiddenMarkovModel> ProfileHiddenMarkovModelPtr;

}

#endif
