# Supplementary material for: ToPS: A Framework to Manipulate Probabilistic Models of Sequence Data
Source: PLoS Comput Biol. 2013 Oct 3;9(10):e1003234. doi: 10.1371/journal.pcbi.1003234 (PMC3789777; doi:10.1371/journal.pcbi.1003234)
Supplement: Software S1 — Source code for ToPS. A compressed file containing the source code for ToPS. (GZ) [file pcbi.1003234.s001.gz › tops/src/SequenceFormat.hpp]

/*
 *       SequenceFormat.hpp
 *
 *       Copyright 2011 Andre Yoshiaki Kashiwabara <akashiwabara@usp.br>
 *                      �gor Bonadio <ibonadio@ime.usp.br>
 *                      Vitor Onuchic <vitoronuchic@gmail.com>
 *                      Alan Mitchell Durham <aland@usp.br>
 *
 *       This program is free software; you can redistribute it and/or modify
 *       it under the terms of the GNU  General Public License as published by
 *       the Free Software Foundation; either version 3 of the License, or
 *       (at your option) any later version.
 *
 *       This program is distributed in the hope that it will be useful,
 *       but WITHOUT ANY WARRANTY; without even the implied warranty of
 *       MERCHANTABILITY or FITNESS FOR A PARTICULAR PURPOSE.  See the
 *       GNU General Public License for more details.
 *
 *       You should have received a copy of the GNU General Public License
 *       along with this program; if not, write to the Free Software
 *       Foundation, Inc., 51 Franklin Street, Fifth Floor, Boston,
 *       MA 02110-1301, USA.
 */

#ifndef SEQUENCE_FORMAT_HPP
#define SEQUENCE_FORMAT_HPP

#include "crossplatform.hpp"

#include <istream>
#include <ostream>
#include <boost/shared_ptr.hpp>


namespace tops {
  class DLLEXPORT SequenceEntry;
  //! Represents a  format for the sequence
  class DLLEXPORT SequenceFormat {
  public:
    SequenceFormat(){};
    virtual ~SequenceFormat(){}
    virtual std::ostream & saveSequence (std::ostream & stream, SequenceEntry & out);
    virtual std::istream & readSequence (std::istream & stream, SequenceEntry & in) ;
  };
  typedef boost::shared_ptr<SequenceFormat> SequenceFormatPtr;

  //! Fasta Format
  class DLLEXPORT FastaSequenceFormat : public SequenceFormat {
  private:
    std::string _nextFastaHeader;
    std::string _currentFastaHeader;
    std::string _currentSequence;
  public:
    FastaSequenceFormat(){};
    virtual ~FastaSequenceFormat(){}
    virtual std::ostream & saveSequence (std::ostream & stream, SequenceEntry & out);
    virtual std::istream & readSequence (std::istream & stream, SequenceEntry & in) ;
  };
  typedef boost::shared_ptr <FastaSequenceFormat> FastaSequenceFormatPtr;

  class DLLEXPORT SequenceFormatManager;
  typedef boost::shared_ptr <SequenceFormatManager> SequenceFormatManagerPtr;
  //! Sequence Format Manager
  class DLLEXPORT SequenceFormatManager {
  public:
    static SequenceFormatManagerPtr instance();
    virtual ~SequenceFormatManager(){};
    virtual void setFormat(SequenceFormatPtr format) {
      _format = format;
    }
    virtual SequenceFormatPtr getFormat(){
      return _format;
    }
  protected:
    SequenceFormatManager() {
      _format = SequenceFormatPtr(new SequenceFormat());
    };
  private:
    static SequenceFormatManagerPtr _inst;
    SequenceFormatPtr _format;
  };

};

#endif
