# Supplementary material for: ToPS: A Framework to Manipulate Probabilistic Models of Sequence Data
Source: PLoS Comput Biol. 2013 Oct 3;9(10):e1003234. doi: 10.1371/journal.pcbi.1003234 (PMC3789777; doi:10.1371/journal.pcbi.1003234)
Supplement: Software S1 — Source code for ToPS. A compressed file containing the source code for ToPS. (GZ) [file pcbi.1003234.s001.gz › tops/src/SimilarityBasedSequenceWeighting.cpp]

/*
 *       SimilarityBasedSequenceWeighting.cpp
 *
 *       Copyright 2011 Andre Yoshiaki Kashiwabara <akashiwabara@usp.br>
 *                      �gor Bonadio <ibonadio@ime.usp.br>
 *                      Vitor Onuchic <vitoronuchic@gmail.com>
 *                      Alan Mitchell Durham <aland@usp.br>
 *
 *       This program is free software; you can redistribute it and/or modify
 *       it under the terms of the GNU  General Public License as published by
 *       the Free Software Foundation; either version 3 of the License, or
 *       (at your option) any later version.
 *
 *       This program is distributed in the hope that it will be useful,
 *       but WITHOUT ANY WARRANTY; without even the implied warranty of
 *       MERCHANTABILITY or FITNESS FOR A PARTICULAR PURPOSE.  See the
 *       GNU General Public License for more details.
 *
 *       You should have received a copy of the GNU General Public License
 *       along with this program; if not, write to the Free Software
 *       Foundation, Inc., 51 Franklin Street, Fifth Floor, Boston,
 *       MA 02110-1301, USA.
 */

#include "SimilarityBasedSequenceWeighting.hpp"
//#include "SimilarityBasedSequenceWeightingCreator.hpp"
#include "TrainDiscreteIIDModel.hpp"
#include "Symbol.hpp"
#include <iostream>
#include <cmath>
#include <sstream>
#include <vector>
#include <iterator>

namespace tops {


  double SimilarityBasedSequenceWeighting::prefix_sum_array_compute(int begin, int end, int phase) {
    if ((begin < (int) _scores.size()) && (begin >= 0)){
      return _scores[begin];
    }
    return -HUGE;
  }
  double SimilarityBasedSequenceWeighting::prefix_sum_array_compute(int begin, int end)
  {
    return prefix_sum_array_compute(begin, end, 0);
  }

  bool SimilarityBasedSequenceWeighting::initialize_prefix_sum_array(const Sequence & s, int phase)
  {
    if(ProbabilisticModel::initialize_prefix_sum_array(s))
      return true;
    _scores.resize(s.size());
    for (int i = 0; i < (int) s.size(); i++)  {
      _scores[i] = evaluate(s, i, s.size() - 1);
    }
    return true;
  }

  bool SimilarityBasedSequenceWeighting::initialize_prefix_sum_array(const Sequence & s)
  {
    return initialize_prefix_sum_array(s, 0);
  }


  std::string SimilarityBasedSequenceWeighting::str() const
  {
    std::stringstream out;

    DoubleMapParameterValuePtr p = DoubleMapParameterValuePtr(new DoubleMapParameterValue(_counter)) ;
    DoubleParameterValuePtr x = DoubleParameterValuePtr(new DoubleParameterValue(_normalizer));
    IntParameterValuePtr so = IntParameterValuePtr(new IntParameterValue(_skip_offset));
    IntParameterValuePtr sl = IntParameterValuePtr(new IntParameterValue(_skip_length));
    StringParameterValuePtr ss = StringParameterValuePtr(new StringParameterValue(_skip_sequence));
    out << "model_name=\"SimilarityBasedSequenceWeighting\""<< std::endl;
    out << ProbabilisticModel::alphabet()->str() << std::endl;
    out << "counter = " <<  p->str() << std::endl;
    out << "normalizer = " << x->str() << std::endl;
    if(_skip_offset >= 0)
      {
        out << "skip_offset = " <<  so->str() << std::endl;
        out << "skip_length = " << sl->str() << std::endl;
        out << "skip_sequence = " << ss->str() << std::endl;
      }

    return out.str();
  }

    //! Calculates the sequence likelihood given this model
  double SimilarityBasedSequenceWeighting::evaluate(const Sequence & s, unsigned int begin, unsigned int end) const {
    if (end >= s.size())
      return -HUGE;
    int length =     (_counter.begin()->first).size();
    std::stringstream qstream;
    for(int i = begin ; (i <= (int)end) && (i < (int) (begin + length)) ; i++){
      qstream << alphabet()->getSymbol(s[i])->name();
    }
    std::string q = qstream.str();
    int psize = 0;
    std::map<std::string, double>::const_iterator it;
    double sum = 0;
    for(it = _counter.begin(); it != _counter.end();  it++)
      {
          std::string q2 = it->first;
          psize = q2.size();
        int diff = 0;
        if(q.size () != q2.size())
          return -HUGE;
        bool valid = true;
        for(int i = 0; i < (int)q2.size(); i++)
          {
            if((i >= _skip_offset) && (i < _skip_offset+_skip_length)){
                if(q[i] != _skip_sequence[i-_skip_offset]){
                    valid = false;
                    break;
                }
            }else if(q[i] != q2[i])
              diff++;
          }
        if(!valid)
            return -HUGE;
        if(diff == 1){
          sum += 0.001 * it->second;
        } else if (diff==0){
          sum += it->second;
        }
      }
    if(close(sum , 0.0, 1e-10))
        return -HUGE;
    return log(sum/(_normalizer));
  }
  void SimilarityBasedSequenceWeighting::initialize (const ProbabilisticModelParameters & p )
  {
    ProbabilisticModelParameterValuePtr alphabetpar = p.getOptionalParameterValue("alphabet");
    ProbabilisticModelParameterValuePtr counterpar = p.getOptionalParameterValue("counter");
    ProbabilisticModelParameterValuePtr lengthpar = p.getOptionalParameterValue("length");
    ProbabilisticModelParameterValuePtr normalizerp = p.getOptionalParameterValue("normalizer");

    ProbabilisticModelParameterValuePtr offsetpar = p.getOptionalParameterValue("skip_offset");
    ProbabilisticModelParameterValuePtr skiplengthpar = p.getOptionalParameterValue("skip_length");
    ProbabilisticModelParameterValuePtr skipseqpar = p.getOptionalParameterValue("skip_sequence");

    if (alphabetpar != NULL)
      {
        AlphabetPtr alpha = AlphabetPtr(new Alphabet());
        alpha->initializeFromVector(alphabetpar->getStringVector());
        setAlphabet(alpha);
      }
    _counter = counterpar->getDoubleMap();
    _normalizer  = normalizerp->getDouble();
    if((skiplengthpar == NULL) || (offsetpar == NULL) )
      {
        _skip_offset = -1;
        _skip_length = -1;
      }
    else
      {
        _skip_offset = offsetpar->getInt();
        _skip_length = skiplengthpar->getInt();
        _skip_sequence = skipseqpar->getString();
      }
  }

  ProbabilisticModelParameters SimilarityBasedSequenceWeighting::parameters() const
  {
    ProbabilisticModelParameters p;
    p.add("model_name", StringParameterValuePtr(new StringParameterValue("SimilarityBasedSequenceWeighting")));
    p.add("alphabet", alphabet()->getParameterValue());
    p.add("counter", DoubleMapParameterValuePtr(new DoubleMapParameterValue(_counter)));
    p.add("normalizer", DoubleParameterValuePtr(new DoubleParameterValue(_normalizer)));
    if(_skip_offset >= 0){
      p.add("skip_length", IntParameterValuePtr(new IntParameterValue(_skip_length)));
      p.add("skip_offset", IntParameterValuePtr(new IntParameterValue(_skip_offset)));
    }
    return p;
  }
}
