# Supplementary material for: ToPS: A Framework to Manipulate Probabilistic Models of Sequence Data
Source: PLoS Comput Biol. 2013 Oct 3;9(10):e1003234. doi: 10.1371/journal.pcbi.1003234 (PMC3789777; doi:10.1371/journal.pcbi.1003234)
Supplement: Software S1 — Source code for ToPS. A compressed file containing the source code for ToPS. (GZ) [file pcbi.1003234.s001.gz › tops/src/SmoothedHistogramBurge.cpp]

/*
 *       SmoothedHistogramBurge.cpp
 *
 *       Copyright 2011 Andre Yoshiaki Kashiwabara <akashiwabara@usp.br>
 *                      Ígor Bonadio <ibonadio@ime.usp.br>
 *                      Vitor Onuchic <vitoronuchic@gmail.com>
 *                      Alan Mitchell Durham <aland@usp.br>
 *
 *       This program is free software; you can redistribute it and/or modify
 *       it under the terms of the GNU  General Public License as published by
 *       the Free Software Foundation; either version 3 of the License, or
 *       (at your option) any later version.
 *
 *       This program is distributed in the hope that it will be useful,
 *       but WITHOUT ANY WARRANTY; without even the implied warranty of
 *       MERCHANTABILITY or FITNESS FOR A PARTICULAR PURPOSE.  See the
 *       GNU General Public License for more details.
 *
 *       You should have received a copy of the GNU General Public License
 *       along with this program; if not, write to the Free Software
 *       Foundation, Inc., 51 Franklin Street, Fifth Floor, Boston,
 *       MA 02110-1301, USA.
 */

#include "SmoothedHistogramBurge.hpp"
#include "DiscreteIIDModel.hpp"
#include "util.hpp"
namespace tops {


  ProbabilisticModelPtr SmoothedHistogramBurge::create( ProbabilisticModelParameters & parameters) const
  {


    ProbabilisticModelParameterValuePtr training_set_parameter =
      parameters.getMandatoryParameterValue("training_set");
    ProbabilisticModelParameterValuePtr cpar =
      parameters.getMandatoryParameterValue("C");
    ProbabilisticModelParameterValuePtr maxlengthp =
      parameters.getOptionalParameterValue("max_length");
    long max = 15000;
    if(maxlengthp != NULL)
        max = maxlengthp->getInt();

    if((training_set_parameter == NULL)||(cpar == NULL)) {
      std::cerr << help () << std::endl;
      ProbabilisticModelPtr nullmodel;
      exit(-1);
      return nullmodel;
    }
    double C = cpar->getDouble();
    DoubleVector data;
    AlphabetPtr alpha = AlphabetPtr(new Alphabet());;
    SequenceList sample_set;
    readSequencesFromFile(sample_set, alpha, training_set_parameter->getString());

    for(int i = 0; i < (int)sample_set.size();i++)
      for(int j = 0; j < (int) sample_set[i].size(); j++)
        data.push_back(sample_set[i][j]);

    typedef std::map<long,double> Lengths;
    int N = data.size();
    Lengths counter;
    Lengths sum;
    Lengths::const_iterator iter;
    for(int i = 0; i < N; i++){
      iter = counter.find((long)data[i]);
      if(iter == counter.end())
        counter[(long)data[i]] = 1.0;
      else
        counter[(long)data[i]] += 1.0;
    }
    double total = 0.0;
    for (int k = 1; k <= max; k++){
      int start = k - 10;
      int end = k + 10;
      if(start < 0)  start = 0;
      sum[k] = 0.0;
      for(int x = start; x < end; x++){
        iter = counter.find((long)x);
        if(iter != counter.end() && iter->second > 0.0){
          double nx = iter->second;
          double mean = x+1.0;
          double sd = sqrt(2*((double)(x+1.0))*C/nx);
          double px2 = 0.5*(1 + _erf((((double)k+1.5) - mean))/ (sd*sqrt(2.0)));
          double px1 = 0.5*(1 + _erf((((double)k+0.5) - mean))/ (sd*sqrt(2.0)));
          assert(nx > 0.0);
          assert(mean > 0.0);
          assert(sd > 0.0);
          sum[k] += nx*(px2 - px1);
        }
      }
      sum[k] = sum[k]/N;
      total = total+ sum[k];
    }
    double epsilon = 1e-5;
    total = total/(1 - max*epsilon);

    DoubleVector prob;
    prob.resize(max+1);
    for (int k = 1; k <= max; k++){
      prob[k] = epsilon + sum[k]/total;
    }

    ProbabilisticModelParameters pars;
    pars.add("probabilities", ProbabilisticModelParameterValuePtr (new DoubleVectorParameterValue(prob)));
    pars.add("alphabet", alpha->getParameterValue());
    DiscreteIIDModelPtr result =
      DiscreteIIDModelPtr(new DiscreteIIDModel());
    result->initialize(pars);
    return result;
  }

}
