# Supplementary material for: ToPS: A Framework to Manipulate Probabilistic Models of Sequence Data
Source: PLoS Comput Biol. 2013 Oct 3;9(10):e1003234. doi: 10.1371/journal.pcbi.1003234 (PMC3789777; doi:10.1371/journal.pcbi.1003234)
Supplement: Software S1 — Source code for ToPS. A compressed file containing the source code for ToPS. (GZ) [file pcbi.1003234.s001.gz › tops/src/SmoothedHistogramKernelDensity.cpp]

/*
 *       SmoothedHistogramKernelDensity.cpp
 *
 *       Copyright 2011 Andre Yoshiaki Kashiwabara <akashiwabara@usp.br>
 *                      �gor Bonadio <ibonadio@ime.usp.br>
 *                      Vitor Onuchic <vitoronuchic@gmail.com>
 *                      Alan Mitchell Durham <aland@usp.br>
 *
 *       This program is free software; you can redistribute it and/or modify
 *       it under the terms of the GNU  General Public License as published by
 *       the Free Software Foundation; either version 3 of the License, or
 *       (at your option) any later version.
 *
 *       This program is distributed in the hope that it will be useful,
 *       but WITHOUT ANY WARRANTY; without even the implied warranty of
 *       MERCHANTABILITY or FITNESS FOR A PARTICULAR PURPOSE.  See the
 *       GNU General Public License for more details.
 *
 *       You should have received a copy of the GNU General Public License
 *       along with this program; if not, write to the Free Software
 *       Foundation, Inc., 51 Franklin Street, Fifth Floor, Boston,
 *       MA 02110-1301, USA.
 */

#include "SmoothedHistogramKernelDensity.hpp"
#include "DiscreteIIDModel.hpp"
#include "util.hpp"

namespace tops {


  ProbabilisticModelPtr SmoothedHistogramKernelDensity::create( ProbabilisticModelParameters & parameters) const
  {
    ProbabilisticModelParameterValuePtr training_set_parameter =
      parameters.getMandatoryParameterValue("training_set");
    ProbabilisticModelParameterValuePtr maxlengthp =
        parameters.getOptionalParameterValue("max_length");
    long max = 15000;
    if(maxlengthp != NULL)
        max = maxlengthp->getInt();


    if(training_set_parameter == NULL) {
      std::cerr << help () << std::endl;
      ProbabilisticModelPtr nullmodel;
      exit(-1);
      return nullmodel;
    }

    DoubleVector data;
    AlphabetPtr alpha = AlphabetPtr(new Alphabet());;
    SequenceEntryList sample_set;
    readSequencesFromFile(sample_set, alpha, training_set_parameter->getString());
    for(int i = 0; i < (int)sample_set.size();i++)
      for(int j = 0; j < (int) (sample_set[i]->getSequence()).size(); j++)
        data.push_back((sample_set[i]->getSequence())[j]);
    std::map<long,double> sum;
    double total = 0.0;

    if(data.size() > 0)
      {
        double bandwidth = sj_bandwidth(data);

        for (int pos = 0; pos <= max; pos++) {
          sum[pos] = 0.0;
          double integral = 0.0;
          double min = kernel_density_estimation(pos-0.5, bandwidth, data);
          double max2 = kernel_density_estimation(pos+0.5, bandwidth, data);
          if(max2 < min) {
            double aux = min;
            min = max2;
            max2 = aux;
          }
          integral += min + (max2 - min)/2;
          sum[pos] = integral;
          total += integral;
        }
      }

    DoubleVector prob;
    prob.resize(max+2);
    for (int k = 0; k <= max; k++){
      prob[k] =  sum[k]/total;
    }


    ProbabilisticModelParameters pars;
    pars.add("probabilities", ProbabilisticModelParameterValuePtr (new DoubleVectorParameterValue(prob)));
    pars.add("alphabet", alpha->getParameterValue());
    DiscreteIIDModelPtr result =
      DiscreteIIDModelPtr(new DiscreteIIDModel());
    result->initialize(pars);

    return result;

  }

}
