# Supplementary material for: ToPS: A Framework to Manipulate Probabilistic Models of Sequence Data
Source: PLoS Comput Biol. 2013 Oct 3;9(10):e1003234. doi: 10.1371/journal.pcbi.1003234 (PMC3789777; doi:10.1371/journal.pcbi.1003234)
Supplement: Software S1 — Source code for ToPS. A compressed file containing the source code for ToPS. (GZ) [file pcbi.1003234.s001.gz › tops/src/SmoothedHistogramStanke.cpp]

/*
 *       SmoothedHistogramStanke.cpp
 *
 *       Copyright 2011 Andre Yoshiaki Kashiwabara <akashiwabara@usp.br>
 *                      Ígor Bonadio <ibonadio@ime.usp.br>
 *                      Vitor Onuchic <vitoronuchic@gmail.com>
 *                      Alan Mitchell Durham <aland@usp.br>
 *
 *       This program is free software; you can redistribute it and/or modify
 *       it under the terms of the GNU  General Public License as published by
 *       the Free Software Foundation; either version 3 of the License, or
 *       (at your option) any later version.
 *
 *       This program is distributed in the hope that it will be useful,
 *       but WITHOUT ANY WARRANTY; without even the implied warranty of
 *       MERCHANTABILITY or FITNESS FOR A PARTICULAR PURPOSE.  See the
 *       GNU General Public License for more details.
 *
 *       You should have received a copy of the GNU General Public License
 *       along with this program; if not, write to the Free Software
 *       Foundation, Inc., 51 Franklin Street, Fifth Floor, Boston,
 *       MA 02110-1301, USA.
 */

#include "SmoothedHistogramStanke.hpp"
#include "DiscreteIIDModel.hpp"
#include "util.hpp"
namespace tops {


  ProbabilisticModelPtr SmoothedHistogramStanke::create( ProbabilisticModelParameters & parameters) const
  {
    ProbabilisticModelParameterValuePtr training_set_parameter =
      parameters.getMandatoryParameterValue("training_set");
    ProbabilisticModelParameterValuePtr maxlengthp =
      parameters.getOptionalParameterValue("max_length");
    ProbabilisticModelParameterValuePtr mp =
      parameters.getOptionalParameterValue("m");
    ProbabilisticModelParameterValuePtr slopep =
      parameters.getOptionalParameterValue("slope");

    ProbabilisticModelParameterValuePtr weightspar = parameters.getOptionalParameterValue("weights");
    std::map <std::string, double> weights;
    if(weightspar != NULL) {
      readMapFromFile(weights, weightspar->getString());
    }

    double a = 0.5;
    int m = 8;

    if(mp != NULL)
        m = mp->getInt();

    if(slopep != NULL)
        a = slopep->getDouble();

    long max = 15000;
    if(maxlengthp != NULL)
        max = maxlengthp->getInt();
    int L = max;
    max = max + 4 * a * max;

    if(training_set_parameter == NULL) {
      ProbabilisticModelPtr nullmodel;
      exit(-1);
      return nullmodel;
    }

    DoubleVector data;
    AlphabetPtr alpha = AlphabetPtr(new Alphabet());;
    SequenceEntryList sample_set;
    readSequencesFromFile(sample_set, alpha, training_set_parameter->getString());
    for(int i = 0; i < (int)sample_set.size();i++) {
      int rep = 1;
      if(weights.find(sample_set[i]->getName()) != weights.end())
        rep = (weights.find(sample_set[i]->getName()))->second;

      for(int j = 0; j < (int) (sample_set[i]->getSequence()).size(); j++) {
        for(int k = 0;k< rep; k++)
            data.push_back((sample_set[i]->getSequence())[j]);
      }
    }
    std::map<long,double> sum;
    std::map<long,double> d;
    std::map<long,int> counter;
    DoubleVector prob;


    vector<double> pi;
    pi.resize(L);

    if(data.size() > 0)
      {
          for(int i = 0; i < (int)data.size(); i++){
              if(counter.find((long)data[i]) == counter.end())
                  counter[(long)data[i]] = 1.0;
              else
                  counter[(long)data[i]] += 1.0;
          }


        double count_left = 0;
        double count_right = 0;

        for(int pos = 0; (pos < L) && (pos < max) ; pos +=1)
            {
              int bwd = (int) (.01+ (a / pow(L, 1.0/5.0) ) * (double)pos);
              if(bwd <= 0)
                bwd = 1;
              for(int j = pos - bwd + 1;  (j <= pos + bwd -1)  ; j++)
                {
                  if (! (j >= 0 && j < L))
                    continue;
                  if(j <= pos)
                    count_left += (counter[j]) ? 1: 0;
                  if(j >= pos)
                    count_right += (counter[j])? 1: 0;
                }

              while (count_left < m && count_right < m && bwd < L)
                {
                  bwd ++;
                  if(pos + bwd -1 < L)
                    count_left += counter[pos + bwd - 1] ? 1:0;
                  if(pos - bwd + 1 >= 0)
                    count_right += counter[pos + bwd - 1] ? 1:0;
                }
              if(pos < L)
                pi[pos] += kernel_normal((double)0, (double)bwd) * counter[pos];
              bool negligible = false;
              int j=1;
              while (!negligible && (pos-j>=0 || pos+j<L)){
                double  wj = kernel_normal(j, bwd) * (counter[pos] );
                if (pos-j>=0 && pos-j<(int)pi.size() ) {
                  pi[pos-j] += wj;
                }
                if (pos+j<(int)pi.size() && pos+j>=0) {
                  pi[pos+j] += wj;
                }
                negligible = (wj < 1e-20);
                j++;
              }
            }
#if 1
        double total = 0;
        for (long k = 0; k < (int)pi.size(); k++){
            total += pi[k];
        }
        prob.resize(L);
        for (long k = 0; k < (int)pi.size(); k++){
            prob[k] =  pi[k]/(total) ;
        }
#endif
      }
    ProbabilisticModelParameters pars;
    pars.add("probabilities", ProbabilisticModelParameterValuePtr (new DoubleVectorParameterValue(prob)));
    pars.add("alphabet", alpha->getParameterValue());
    DiscreteIIDModelPtr result =
      DiscreteIIDModelPtr(new DiscreteIIDModel());
    result->initialize(pars);
    return result;
  }

}
