# Supplementary material for: ToPS: A Framework to Manipulate Probabilistic Models of Sequence Data
Source: PLoS Comput Biol. 2013 Oct 3;9(10):e1003234. doi: 10.1371/journal.pcbi.1003234 (PMC3789777; doi:10.1371/journal.pcbi.1003234)
Supplement: Software S1 — Source code for ToPS. A compressed file containing the source code for ToPS. (GZ) [file pcbi.1003234.s001.gz › tops/src/TrainHMMBaumWelch.cpp]

/*
 *       TrainHMMBaumWelch.cpp
 *
 *       Copyright 2011 Andre Yoshiaki Kashiwabara <akashiwabara@usp.br>
 *                      Ígor Bonadio <ibonadio@ime.usp.br>
 *                      Vitor Onuchic <vitoronuchic@gmail.com>
 *                      Alan Mitchell Durham <aland@usp.br>
 *
 *       This program is free software; you can redistribute it and/or modify
 *       it under the terms of the GNU  General Public License as published by
 *       the Free Software Foundation; either version 3 of the License, or
 *       (at your option) any later version.
 *
 *       This program is distributed in the hope that it will be useful,
 *       but WITHOUT ANY WARRANTY; without even the implied warranty of
 *       MERCHANTABILITY or FITNESS FOR A PARTICULAR PURPOSE.  See the
 *       GNU General Public License for more details.
 *
 *       You should have received a copy of the GNU General Public License
 *       along with this program; if not, write to the Free Software
 *       Foundation, Inc., 51 Franklin Street, Fifth Floor, Boston,
 *       MA 02110-1301, USA.
 */

#include "ProbabilisticModel.hpp"
#include "ProbabilisticModelCreator.hpp"
#include "ConfigurationReader.hpp"
#include "TrainHMMBaumWelch.hpp"
#include "util.hpp"
#include "ProbabilisticModelCreatorClient.hpp"
namespace tops {

  ProbabilisticModelPtr TrainHMMBaumWelch::create( ProbabilisticModelParameters & parameters) const
  {
    ProbabilisticModelParameterValuePtr initmodelpar = parameters.getOptionalParameterValue("initial_model");
    ProbabilisticModelParameterValuePtr initspecificationpar = parameters.getOptionalParameterValue("initial_specification");

    ProbabilisticModelParameterValuePtr trainpar = parameters.getMandatoryParameterValue("training_set");
    ProbabilisticModelParameterValuePtr thrpar = parameters.getOptionalParameterValue("threshold");
    ProbabilisticModelParameterValuePtr maxiterpar = parameters.getOptionalParameterValue("maxiter");

    if(initspecificationpar != NULL) 
	    initmodelpar = initspecificationpar;
    if((initspecificationpar == NULL) && (initmodelpar == NULL)) 
	    std::cerr << "ERROR: initial_specification is a mandatory paramenter\n" << std::endl;

    double threshold = 1e-5;
    if(thrpar != NULL)
      threshold = thrpar->getDouble();
    int maxiter = 500;
    if(maxiterpar != NULL)
      maxiter = maxiterpar->getInt();

    ProbabilisticModelCreatorClient creator;
    std::string name = initmodelpar->getString();
    ProbabilisticModelPtr m = creator.create(name);
    SequenceEntryList sample_set;
    AlphabetPtr alphabet = m->alphabet();
    readSequencesFromFile(sample_set, alphabet, trainpar->getString());
    SequenceList seqs;
    for(int i = 0; i < (int)sample_set.size(); i++)
      seqs.push_back(sample_set[i]->getSequence());
    m->trainBaumWelch(seqs, maxiter, threshold);
    return m;
  }
};
