# Supplementary material for: ToPS: A Framework to Manipulate Probabilistic Models of Sequence Data
Source: PLoS Comput Biol. 2013 Oct 3;9(10):e1003234. doi: 10.1371/journal.pcbi.1003234 (PMC3789777; doi:10.1371/journal.pcbi.1003234)
Supplement: Software S1 — Source code for ToPS. A compressed file containing the source code for ToPS. (GZ) [file pcbi.1003234.s001.gz › tops/src/TrainInterpolatedPhasedMarkovChain.cpp]

/*
 *       TrainInterpolatedPhasedMarkovChain.cpp
 *
 *       Copyright 2011 Andre Yoshiaki Kashiwabara <akashiwabara@usp.br>
 *                      Ígor Bonadio <ibonadio@ime.usp.br>
 *                      Vitor Onuchic <vitoronuchic@gmail.com>
 *                      Alan Mitchell Durham <aland@usp.br>
 *
 *       This program is free software; you can redistribute it and/or modify
 *       it under the terms of the GNU  General Public License as published by
 *       the Free Software Foundation; either version 3 of the License, or
 *       (at your option) any later version.
 *
 *       This program is distributed in the hope that it will be useful,
 *       but WITHOUT ANY WARRANTY; without even the implied warranty of
 *       MERCHANTABILITY or FITNESS FOR A PARTICULAR PURPOSE.  See the
 *       GNU General Public License for more details.
 *
 *       You should have received a copy of the GNU General Public License
 *       along with this program; if not, write to the Free Software
 *       Foundation, Inc., 51 Franklin Street, Fifth Floor, Boston,
 *       MA 02110-1301, USA.
 */

#include "ContextTree.hpp"
#include "TrainInterpolatedPhasedMarkovChain.hpp"
#include "InhomogeneousMarkovChain.hpp"
#include "ProbabilisticModelParameter.hpp"
#include "ProbabilisticModelCreatorClient.hpp"
namespace tops {

    ProbabilisticModelPtr TrainInterpolatedPhasedMarkovChain::create(
                                                                     ProbabilisticModelParameters & parameters, double & loglikelihood,
                                                                     int & sample_size) const {
        ProbabilisticModelParameterValuePtr alphabetpar =
            parameters.getMandatoryParameterValue("alphabet");
        ProbabilisticModelParameterValuePtr trainingsetpar =
            parameters.getMandatoryParameterValue("training_set");
        ProbabilisticModelParameterValuePtr trainingsetpar1 =
            parameters.getOptionalParameterValue("training_set_1");
        ProbabilisticModelParameterValuePtr trainingsetpar2 =
            parameters.getOptionalParameterValue("training_set_2");


        ProbabilisticModelParameterValuePtr orderpar =
            parameters.getMandatoryParameterValue("order");
        ProbabilisticModelParameterValuePtr number_of_phasespar =
            parameters.getMandatoryParameterValue("number_of_phases");
        ProbabilisticModelParameterValuePtr pseudocountspar = parameters.getOptionalParameterValue("pseudo_counts");
        ProbabilisticModelParameterValuePtr aprioripar = parameters.getOptionalParameterValue("apriori");
        ProbabilisticModelParameterValuePtr weightspar = parameters.getOptionalParameterValue("weights");
        std::map <std::string, double> weights;
        if(weightspar != NULL) {
          readMapFromFile(weights, weightspar->getString());
        }

        double pseudocounts = 0;
        if(pseudocountspar != NULL)
            pseudocounts = pseudocountspar->getDouble();
        ProbabilisticModelPtr apriori;
        if(aprioripar != NULL)
            {
                ProbabilisticModelCreatorClient c;
                apriori = c.create(aprioripar->getString());
            }


        if ((alphabetpar == NULL) || (trainingsetpar == NULL)
            || (orderpar == NULL) || (number_of_phasespar == NULL)) {
            std::cerr << help() << std::endl;
            exit(-1);
        }
        AlphabetPtr alphabet = AlphabetPtr(new Alphabet());
        alphabet->initializeFromVector(alphabetpar ->getStringVector());
        SequenceEntryList sample_set;
        readSequencesFromFile(sample_set, alphabet, trainingsetpar->getString());
        SequenceEntryList sample_set_1;
        if(trainingsetpar1 != NULL)
            {
                readSequencesFromFile(sample_set_1, alphabet, trainingsetpar1->getString());
            }
        SequenceEntryList sample_set_2;
        if(trainingsetpar2 != NULL)
            {
                readSequencesFromFile(sample_set_2, alphabet, trainingsetpar1->getString());
            }

        int order = orderpar->getInt();
        int length = number_of_phasespar->getInt() ;
        std::vector<ContextTreePtr> positional_distribution;
        positional_distribution.resize(length);
        sample_size = 0;

        for (int i = 0; i < length; i++) {
            SequenceEntryList positionalSample;
            for(int j = 0; j < (int)sample_set.size(); j++)
                {
                    int nseq = 0;
                    std::string name = sample_set[j]->getName();
                    while(true)
                        {
                            int start = (length) * nseq - order + i;
                            if(start < 0) {
                                nseq++;
                                continue;
                            }
                            int end = (length) * nseq + i;
                            if(end >= (int)(sample_set[j]->getSequence()).size())
                                break;
                            Sequence s;
                            for(int k = start; k <= end; k++)
                                s.push_back((sample_set[j]->getSequence())[k]);
                            SequenceEntryPtr entry = SequenceEntryPtr (new SequenceEntry(alphabet));
                            entry->setSequence(s);
                            entry->setName(name);
                            positionalSample.push_back(entry);
                            nseq++;
                        }
                }


            for(int j = 0; j < (int)sample_set_1.size(); j++)
                {
                    int nseq = 0;
                    std::string name = sample_set_1[j]->getName();
                    while(true)
                        {
                            int start = (length) * nseq - order + i -1;
                            if(start < 0) {
                                nseq++;
                                continue;
                            }
                            int end = (length) * nseq + i -1;
                            if(end >= (int)(sample_set_1[j]->getSequence()).size())
                                break;
                            Sequence s;
                            for(int k = start; k <= end; k++)
                                s.push_back((sample_set_1[j]->getSequence())[k]);
                            SequenceEntryPtr entry = SequenceEntryPtr (new SequenceEntry(alphabet));
                            entry->setSequence(s);
                            entry->setName(name);
                            positionalSample.push_back(entry);
                            nseq++;
                        }
                }

            for(int j = 0; j < (int)sample_set_2.size(); j++)
                {
                    int nseq = 0;
                    std::string name = sample_set_2[j]->getName();
                    while(true)
                        {
                            int start = (length) * nseq - order + i -2;
                            if(start < 0) {
                                nseq++;
                                continue;
                            }
                            int end = (length) * nseq + i -2;
                            if(end >= (int)(sample_set_2[j]->getSequence()).size())
                                break;
                            Sequence s;
                            for(int k = start; k <= end; k++)
                                s.push_back((sample_set_2[j]->getSequence())[k]);
                            SequenceEntryPtr entry = SequenceEntryPtr (new SequenceEntry(alphabet));
                            entry->setSequence(s);
                            entry->setName(name);
                            positionalSample.push_back(entry);
                            nseq++;
                        }
                }

            ContextTreePtr tree = ContextTreePtr(new ContextTree(alphabet));

            if(apriori != NULL){
              tree->initializeCounter(positionalSample, order, 0, weights);
                tree->pruneTreeSmallSampleSize(400);
                tree->normalize(apriori, pseudocounts, i);

            } else {
              tree->initializeCounter(positionalSample, order, pseudocounts, weights);
                tree->pruneTreeSmallSampleSize(400);
                tree->normalize();
            }

            positional_distribution[i] = tree;
        }
        InhomogeneousMarkovChainPtr model = InhomogeneousMarkovChainPtr(
                                                                        new InhomogeneousMarkovChain());
        model->setPositionSpecificDistribution(positional_distribution);
        model->phased(1);
        model->setAlphabet(alphabet);
        loglikelihood = 0.0;

        for (int j = 0; j < (int) sample_set.size(); j++) {
            sample_size += (sample_set[j]->getSequence()).size();

            loglikelihood += model->evaluate((sample_set[j]->getSequence()), 0, (sample_set[j]->getSequence()).size()
                                             - 1);
        }
        return model;

    }
    ProbabilisticModelPtr TrainInterpolatedPhasedMarkovChain::create(
                                                                     ProbabilisticModelParameters & parameters) const {
        int size;
        double loglikelihood;
        return create(parameters, loglikelihood, size);
    }
}
