# Supplementary material for: ToPS: A Framework to Manipulate Probabilistic Models of Sequence Data
Source: PLoS Comput Biol. 2013 Oct 3;9(10):e1003234. doi: 10.1371/journal.pcbi.1003234 (PMC3789777; doi:10.1371/journal.pcbi.1003234)
Supplement: Software S1 — Source code for ToPS. A compressed file containing the source code for ToPS. (GZ) [file pcbi.1003234.s001.gz › tops/tops-R-package/DESCRIPTION]

Package: ToPS
Type: Package
Title: This package provides an interface to access ToPS using R
Version: 1.0
Date: 2010-04-13
Author: Andr� Yoshiaki Kashiwabara
Maintainer: Andr� Yoshiaki Kashiwabara <akashiwabara@usp.br>
Description: ToPS is an object oriented framework written in C++ that provides a set of probabilistic model to analyze sequence data.
License: GPL 
LazyLoad: yes
