# Supplementary material for: ToPS: A Framework to Manipulate Probabilistic Models of Sequence Data
Source: PLoS Comput Biol. 2013 Oct 3;9(10):e1003234. doi: 10.1371/journal.pcbi.1003234 (PMC3789777; doi:10.1371/journal.pcbi.1003234)
Supplement: Software S1 — Source code for ToPS. A compressed file containing the source code for ToPS. (GZ) [file pcbi.1003234.s001.gz › tops/tops-R-package/R/zzz.R]

.initToPS <- function (where) {
  setClass("tops", representation(modelName="character", parameters="list"),where=where)
}
.First.lib <- function(libname, pkgname, where ) {
  if( !require(methods) ) stop("we require methods for package tops")
  where <- match(paste("package:", pkgname, sep=""), search())
  .initToPS(where)
  library.dynam("ToPS", pkgname, libname)
}
