# Supplementary material for: ToPS: A Framework to Manipulate Probabilistic Models of Sequence Data
Source: PLoS Comput Biol. 2013 Oct 3;9(10):e1003234. doi: 10.1371/journal.pcbi.1003234 (PMC3789777; doi:10.1371/journal.pcbi.1003234)
Supplement: Software S1 — Source code for ToPS. A compressed file containing the source code for ToPS. (GZ) [file pcbi.1003234.s001.gz › tops/tops-R-package/src/Makevars]

PKG_CPPFLAGS=-I/usr/local/include/tops/ -I/usr/local/include -I/opt/local/include
PKG_LIBS=-L/usr/local/lib/ -lToPS
