# Supplementary material for: ToPS: A Framework to Manipulate Probabilistic Models of Sequence Data
Source: PLoS Comput Biol. 2013 Oct 3;9(10):e1003234. doi: 10.1371/journal.pcbi.1003234 (PMC3789777; doi:10.1371/journal.pcbi.1003234)
Supplement: Software S1 — Source code for ToPS. A compressed file containing the source code for ToPS. (GZ) [file pcbi.1003234.s001.gz › tops/tops-R-package/src/tops_to_R.cpp]

#include "ProbabilisticModel.hpp"
#include "ToPSWrapperClient.hpp"
#include "tops_to_R.hpp"

SEXP parametersToSEXP (tops::ProbabilisticModelPtr model) {
  SEXP r;
  ToPSWrapperClient * client = new ToPSWrapperClient() ;
  r = client->convert (model);
  delete client;
  return r;
}
