# Supplementary material for: ToPS: A Framework to Manipulate Probabilistic Models of Sequence Data
Source: PLoS Comput Biol. 2013 Oct 3;9(10):e1003234. doi: 10.1371/journal.pcbi.1003234 (PMC3789777; doi:10.1371/journal.pcbi.1003234)
Supplement: Software S1 — Source code for ToPS. A compressed file containing the source code for ToPS. (GZ) [file pcbi.1003234.s001.gz › tops/tops-R-package/src/tops_to_R.hpp]

#ifndef TOPS_TO_R
#define TOPS_TO_R

#include <map>
#include <boost/shared_ptr.hpp>
#include "ProbabilisticModelParameter.hpp"
#include "ProbabilisticModel.hpp"

extern "C" {
#include <R.h>
#include <Rinternals.h>
#include <Rdefines.h>
#include <R_ext/Rdynload.h>
#include <Rembedded.h>
#include <Rinterface.h>
#include <R_ext/RS.h>
#include <R_ext/Error.h>
#include <R_ext/PrtUtil.h>
}

SEXP parametersToSEXP (tops::ProbabilisticModelPtr model);

#endif
