# Supplementary material for: ToPS: A Framework to Manipulate Probabilistic Models of Sequence Data
Source: PLoS Comput Biol. 2013 Oct 3;9(10):e1003234. doi: 10.1371/journal.pcbi.1003234 (PMC3789777; doi:10.1371/journal.pcbi.1003234)
Supplement: Software S1 — Source code for ToPS. A compressed file containing the source code for ToPS. (GZ) [file pcbi.1003234.s001.gz › tops/tops-R-package/src/train.cpp]

#include "ProbabilisticModel.hpp"
#include "DecodableModel.hpp"
#include "SequenceEntry.hpp"
#include "SequenceFormat.hpp"

#include "ProbabilisticModelCreatorClient.hpp"


extern "C" {
#include <R.h>
#include <Rinternals.h>
#include <Rdefines.h>
#include <R_ext/Rdynload.h>
#include <Rembedded.h>
#include <Rinterface.h>
#include <R_ext/RS.h>
#include <R_ext/Error.h>
#include <R_ext/PrtUtil.h>
}
#include "tops_to_R.hpp"
using namespace tops;
SEXP train_model(SEXP exp) 
{
  int nargs = length(exp);
  const char * f;
  if (nargs >= 2) {
    exp = CDR(exp);
    f = CHAR(STRING_ELT(CAR(exp), 0));
    std::string filename(f);
      
    ProbabilisticModelCreatorClient creator;
    ProbabilisticModelPtr model = creator.train(filename);
    if(model != NULL) 
      {
	SEXP r = parametersToSEXP(model);
	return r;
      }
  }
  return R_NilValue;
}
