# Supplementary figures and images for: ToPS: A Framework to Manipulate Probabilistic Models of Sequence Data
Source: PLOS journal article supplement (doi:10.1371/journal.pcbi.1003234), 2013-10-03

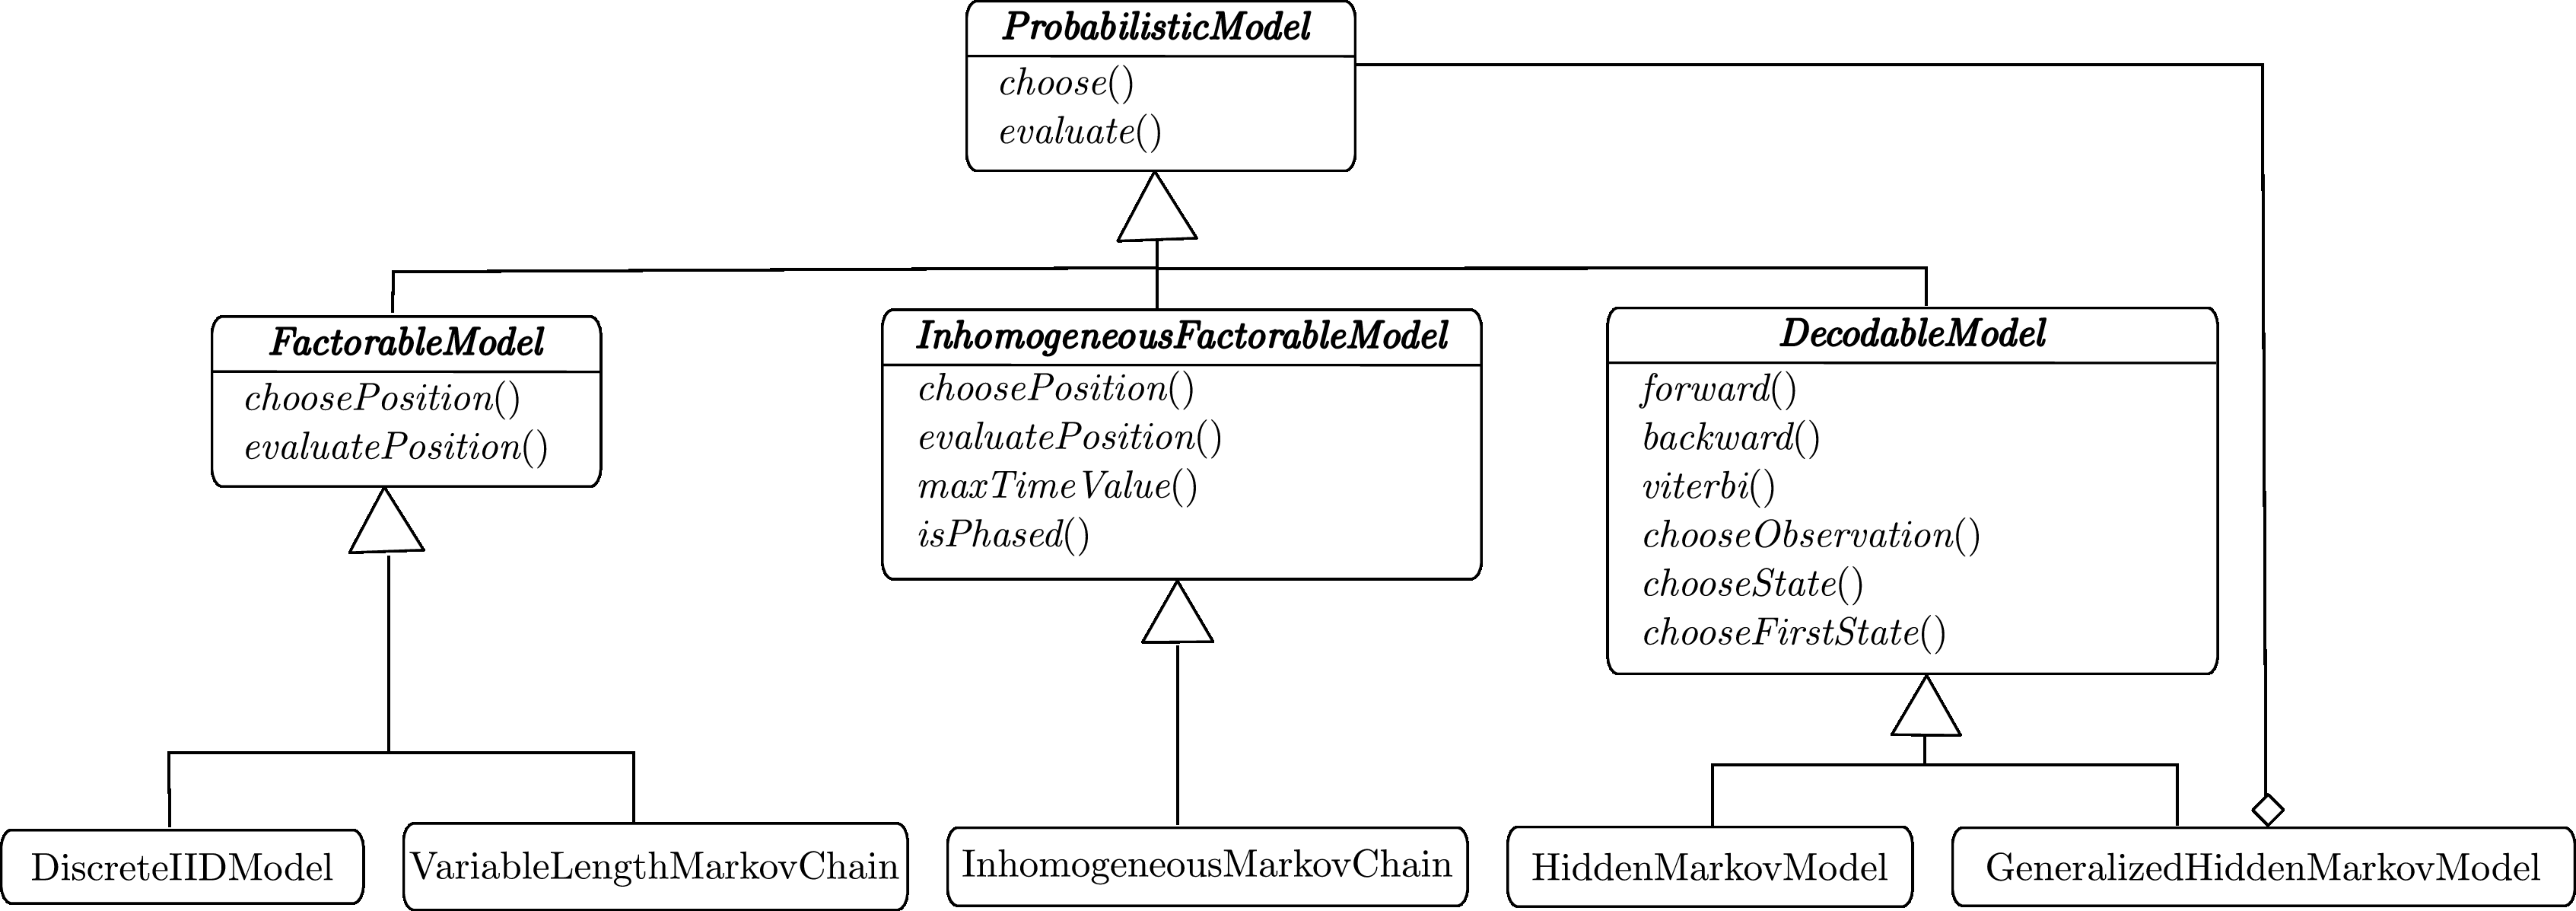

Supplement: S1 (10.1371/journal.pcbi.1003234.s001) [file journal.pcbi.1003234.s001]

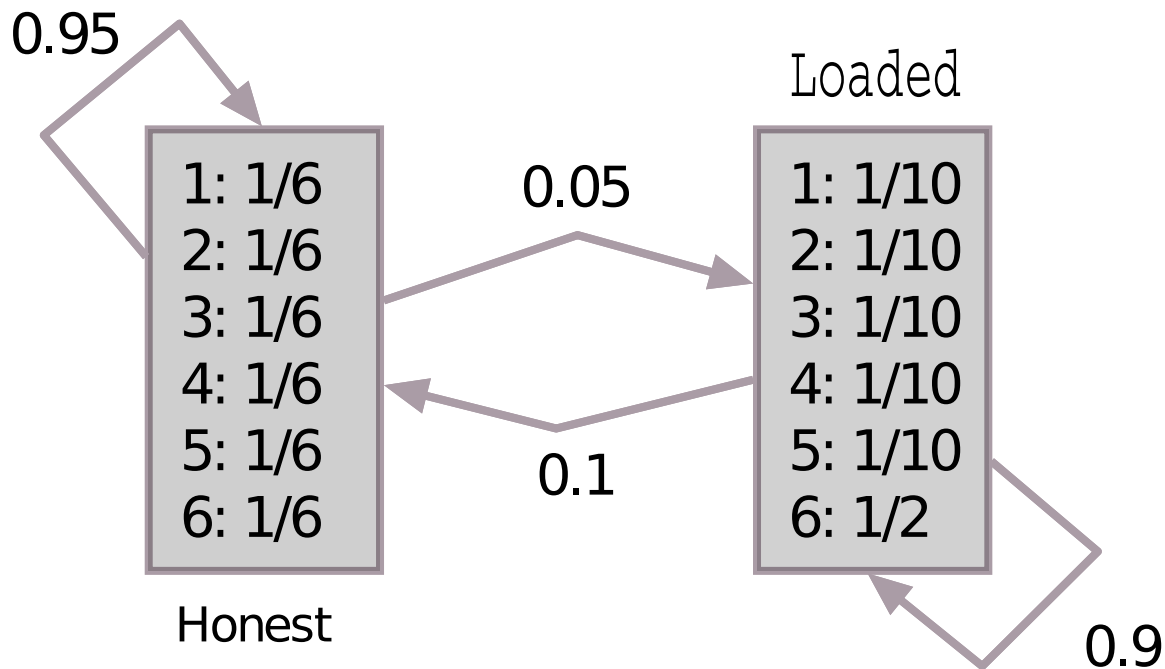

Supplement: S1 (10.1371/journal.pcbi.1003234.s001) [file journal.pcbi.1003234.s001]

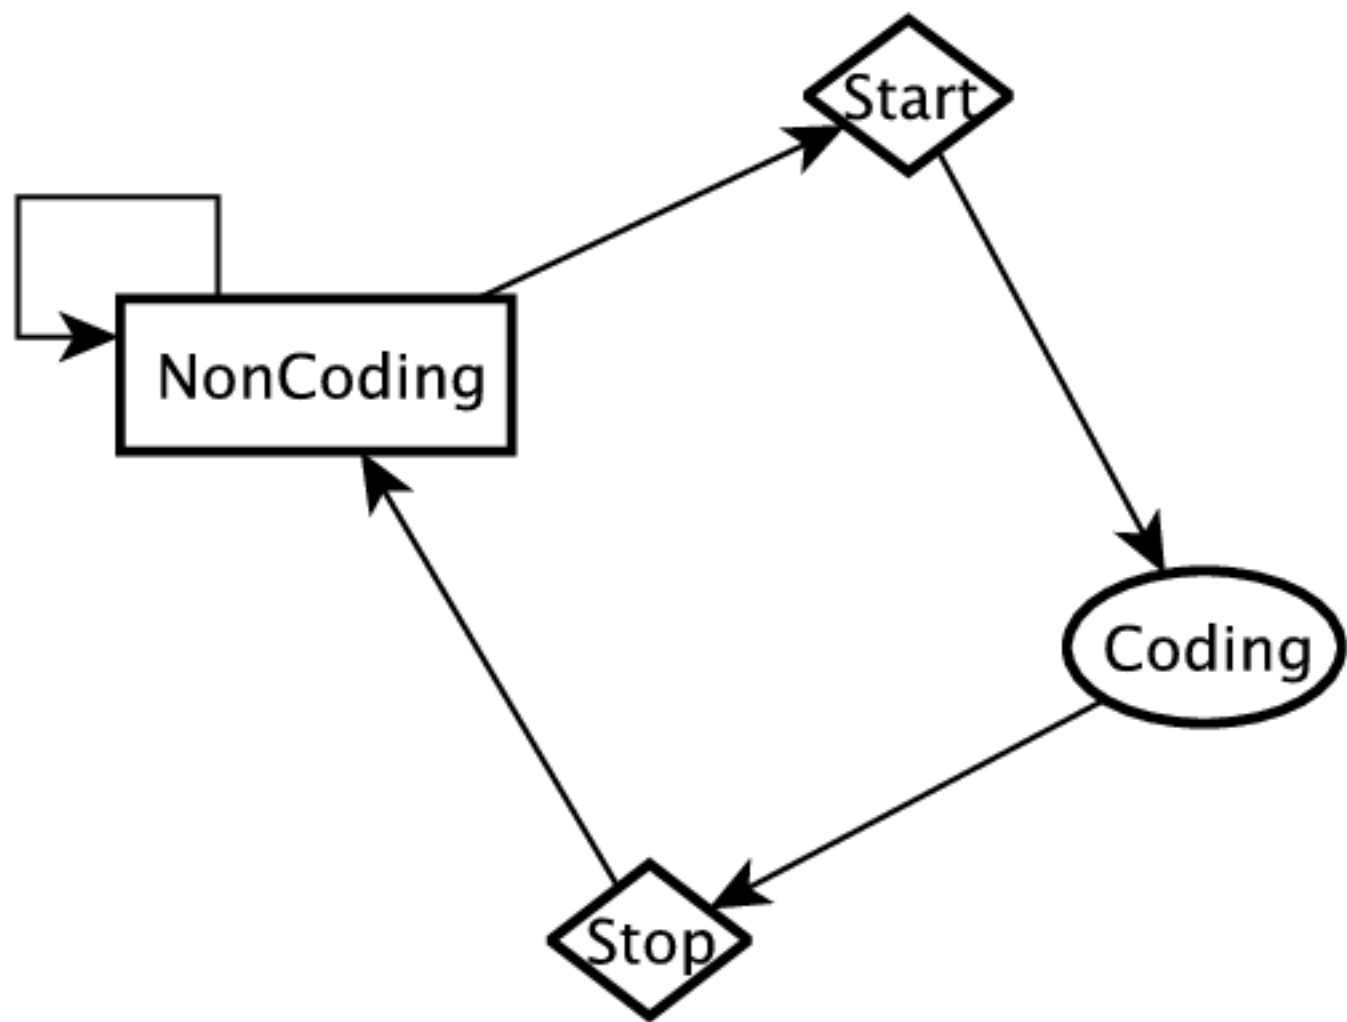

Supplement: S1 (10.1371/journal.pcbi.1003234.s001) [file journal.pcbi.1003234.s001]

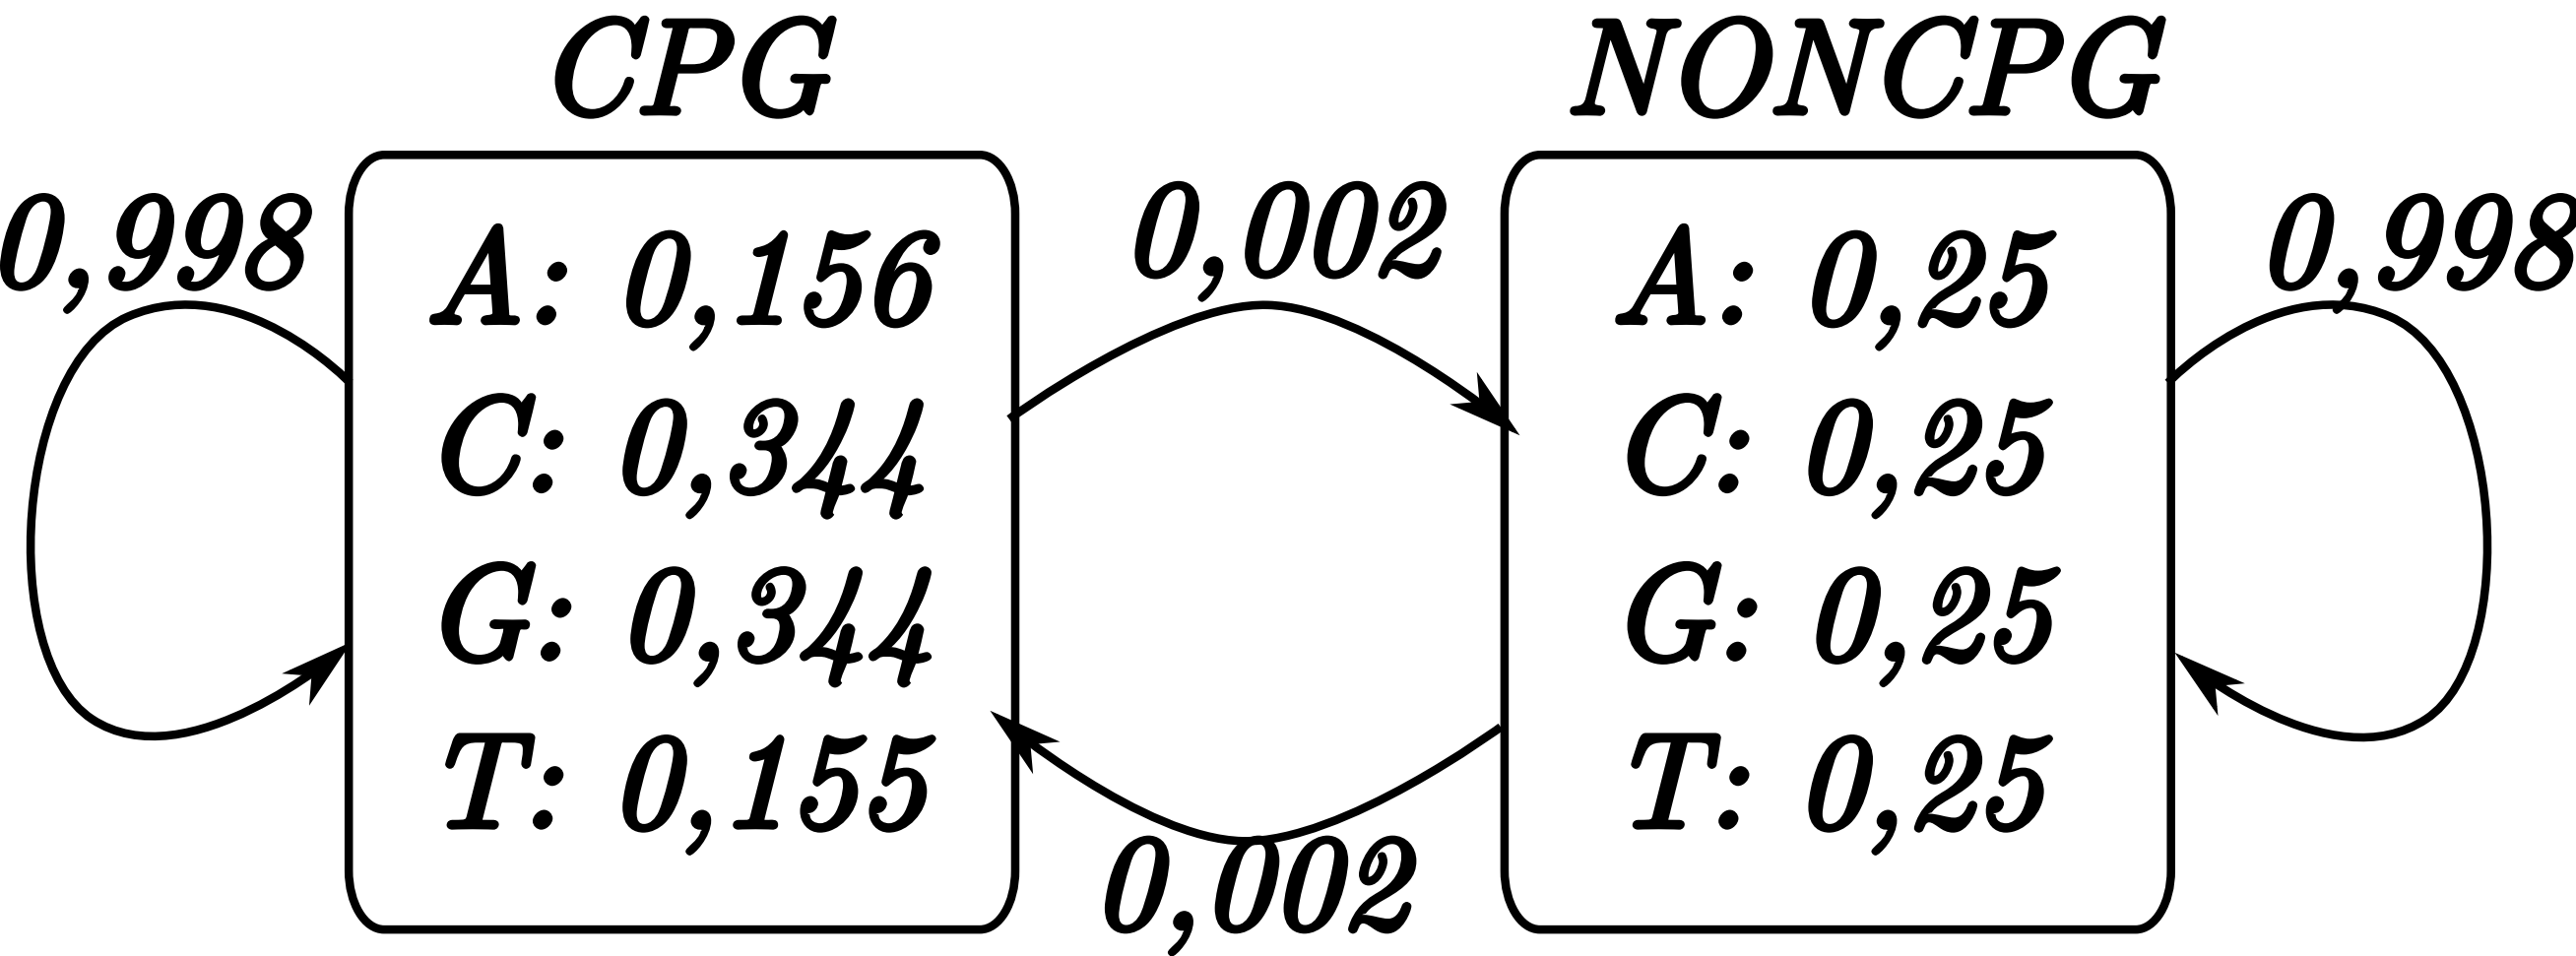

Supplement: S1 (10.1371/journal.pcbi.1003234.s001) [file journal.pcbi.1003234.s001]
